# Supplementary material for: Sites for Dynamic Protein-Carbohydrate Interactions of O- and C-Linked Mannosides on the E. coli FimH Adhesin
Source: MDPI journal article supplement (doi:10.3390/molecules22071101), 2017-07-03
Supplement: s1 [file s1]

## Supporting Information

Sites for dynamic protein-carbohydrate interactions of *O*- and *C*-linked mannosides on the *E. coli* FimH adhesin

Mohamed Touaibia,<sup>†,‡,\*</sup> Eva-Maria Krammer,<sup>§,\*</sup> Tze C. Shiao,<sup>†</sup> Nao Yamakawa,<sup>§</sup> Qingan Wang,<sup>†</sup> Anja Glinschert,<sup>⊥</sup> Alex Papadopoulos,<sup>†</sup> Leila Mousavifar,<sup>†</sup> Emmanuel Maes,<sup>§</sup> Stefan Oscarson,<sup>⊥</sup> Gerard Vergoten,<sup>§</sup> Marc F. Lensink,<sup>§</sup> René Roy,<sup>†,¶</sup> Julie Bouckaert,<sup>§,¶</sup>

<sup>‡</sup> M. Touaibia

Department of Chemistry and Biochemistry, Université de Moncton, Moncton, New Brunswick, Canada

<sup>§</sup> E.-M. Krammer, N. Yamakawa, E. Maes, G. Vergoten, M. F. Lensink, J. Bouckaert

Univ. Lille, CNRS, UMR 8576 - UGSF - Unité de Glycobiologie Structurale et Fonctionnelle, F-59000 Lille, France Fax +33 (0) 320 43 65 55 E-mail: [julie.bouckaert@univ-lille1.fr](mailto:julie.bouckaert@univ-lille1.fr)

<sup>†</sup> T.C. Shiao, Q. Wang, A. Papadopoulos, L. Mousavifar, R. Roy

Pharmaqam, Department of Chemistry, Université du Québec à Montréal, P. O. Box 8888, Succ. Centre-ville, Montréal, Québec, H3C 3P8, Canada

Fax: (+1) 514-987-4054, E-mail: [roy.rene@uqam.ca](mailto:roy.rene@uqam.ca)

<sup>⊥</sup> A. Glinschert, S. Oscarson

Center for Synthesis and Chemical Biology (CSCB), University College Dublin, Belfield, Dublin 4, Ireland

Corresponding Authors

Phone: +1 514987 3000 ext 2546. Email: [roy.rene@uqam.ca](mailto:roy.rene@uqam.ca);

Phone: +33 362 53 17 29. E-mail: [julie.bouckaert@univ-lille1.fr](mailto:julie.bouckaert@univ-lille1.fr)

|                                                                                                                    |                                     |
|--------------------------------------------------------------------------------------------------------------------|-------------------------------------|
| <b>TABLE OF FIGURES .....</b>                                                                                      | <b>4</b>                            |
| <b>TABLE OF SCHEMES .....</b>                                                                                      | <b>ERROR! BOOKMARK NOT DEFINED.</b> |
| <b>SYNTHESIS OF O- AND C-LINKED MANNOPYRANOSIDE LIBRARIES .....</b>                                                | <b>6</b>                            |
| <b>RATIONAL FOR DESIGN AND RESULTS OF THE SYNTHESSES .....</b>                                                     | <b>6</b>                            |
| <b>FULL DETAILS OF SYNTHETIC PROTOCOLS AND STRUCTURAL CHARACTERIZATION FOR COMPOUNDS 18-123 .....</b>              | <b>12</b>                           |
| GENERAL METHODS.....                                                                                               | 12                                  |
| GENERAL PROCEDURE OF HECK COUPLING FOR SYNTHESIS OF PROTECTED O- AND C-MANNOSIDES <b>18-21, 111-114</b> .....      | 12                                  |
| GENERAL PROCEDURE FOR DE-O-ACETYLATION.....                                                                        | 12                                  |
| GENERAL PROCEDURE FOR HYDROGENATION ( <b>26-29, 119-123</b> ) .....                                                | 12                                  |
| GENERAL PROCEDURE OF THE RADICAL ADDITION FOR SYNTHESIS OF PROTECTED SULFUR SERIES <b>30-34, 101-105</b> .....     | 13                                  |
| GENERAL PROCEDURE OF SONOGASHIRA COUPLING FOR SYNTHESIS OF PROTECTED O- AND C-MANNOSIDES <b>42-49, 59-60</b> ..... | 13                                  |
| GENERAL PROCEDURE FOR SYNTHESIS OF PROTECTED SULFAMIDE SERIES <b>64-69</b> .....                                   | 13                                  |
| GENERAL PROCEDURE FOR SYNTHESIS OF PROTECTED AMIDE SERIES <b>81-98</b> .....                                       | 13                                  |
| GENERAL PROCEDURE FOR DEBENZYLATION: SYNTHESIS OF UNPROTECTED AMIDES SERIES <b>91-96</b> .....                     | 13                                  |
| IMPROVED PROCEDURE FOR THE PREPARATION OF N-HEPTYL $\alpha$ -D-MANNOPYRANOSIDE <b>5</b> .....                      | 14                                  |
| <b>PROTON NMR STRUCTURAL ANALYSIS OF ALL COMPOUNDS .....</b>                                                       | <b>14</b>                           |
| Compound <b>18</b> .....                                                                                           | 14                                  |
| Compound <b>19</b> .....                                                                                           | 14                                  |
| Compound <b>20</b> .....                                                                                           | 15                                  |
| Compound <b>21</b> .....                                                                                           | 15                                  |
| Compound <b>22</b> .....                                                                                           | 15                                  |
| Compound <b>23</b> .....                                                                                           | 16                                  |
| Compound <b>24</b> .....                                                                                           | 16                                  |
| Compound <b>25</b> .....                                                                                           | 16                                  |
| Compound <b>26</b> .....                                                                                           | 17                                  |
| Compound <b>27</b> .....                                                                                           | 17                                  |
| Compound <b>28</b> .....                                                                                           | 17                                  |
| Compound <b>29</b> .....                                                                                           | 17                                  |
| Compound <b>30</b> .....                                                                                           | 18                                  |
| Compound <b>31</b> .....                                                                                           | 18                                  |
| Compound <b>32</b> .....                                                                                           | 18                                  |
| Compound <b>33</b> .....                                                                                           | 19                                  |
| Compound <b>35</b> .....                                                                                           | 18                                  |
| Compound <b>34</b> .....                                                                                           | 19                                  |
| Compound <b>36</b> .....                                                                                           | 20                                  |
| Compound <b>37</b> .....                                                                                           | 20                                  |
| Compound <b>38</b> .....                                                                                           | 20                                  |
| Compound <b>39</b> .....                                                                                           | 21                                  |
| Compound <b>40</b> .....                                                                                           | 21                                  |
| Compound <b>41</b> .....                                                                                           | 21                                  |
| Compound <b>42</b> .....                                                                                           | 21                                  |
| Compound <b>43</b> .....                                                                                           | 21                                  |
| Compound <b>44</b> .....                                                                                           | 22                                  |
| Compound <b>45</b> .....                                                                                           | 22                                  |
| Compound <b>46</b> .....                                                                                           | 22                                  |
| Compound <b>47</b> .....                                                                                           | 23                                  |
| Compound <b>48</b> .....                                                                                           | 23                                  |

|                                                     |    |
|-----------------------------------------------------|----|
| Compound 49.....                                    | 23 |
| Compound 50.....                                    | 24 |
| Compound 51.....                                    | 24 |
| Compound 52.....                                    | 24 |
| Compound 53.....                                    | 24 |
| Compound 54.....                                    | 25 |
| Compound 55.....                                    | 25 |
| Compound 56.....                                    | 25 |
| Compound 57.....                                    | 25 |
| Compound 59.....                                    | 26 |
| Compound 60.....                                    | 26 |
| Compound 61.....                                    | 26 |
| Compound 62.....                                    | 27 |
| Compound 63.....                                    | 27 |
| Compound 64.....                                    | 27 |
| Compound 65.....                                    | 27 |
| Compound 66.....                                    | 28 |
| Compound 67.....                                    | 28 |
| Compound 68.....                                    | 28 |
| Compound 69.....                                    | 29 |
| Compound 70.....                                    | 29 |
| Compound 71.....                                    | 29 |
| Compound 72.....                                    | 29 |
| Compound 73.....                                    | 30 |
| Compound 74.....                                    | 30 |
| Compound 75.....                                    | 30 |
| Compound 76.....                                    | 31 |
| Compound 77 : full structural characterization..... | 31 |
| Compound 78: full structural characterization.....  | 33 |
| Compound 79 .....                                   | 37 |
| Compound 80.....                                    | 37 |
| Compound 81.....                                    | 37 |
| Compound 82.....                                    | 38 |
| Compound 83.....                                    | 38 |
| Compound 84.....                                    | 38 |
| Compound 85.....                                    | 39 |
| Compound 86.....                                    | 39 |
| Compound 87.....                                    | 39 |
| Compound 88.....                                    | 40 |
| Compound 89 : full structural characterization..... | 39 |
| Compound 90.....                                    | 42 |
| Compound 91.....                                    | 42 |
| Compound 92.....                                    | 42 |
| Compound 93.....                                    | 42 |
| Compound 94.....                                    | 43 |
| Compound 95.....                                    | 43 |
| Compound 96.....                                    | 43 |
| Compound 97.....                                    | 44 |
| Compound 98.....                                    | 43 |
| Compound 99.....                                    | 44 |
| Compound 100.....                                   | 45 |
| Compound 101.....                                   | 46 |
| Compound 102.....                                   | 46 |

|                                                                                                                                                                                                    |           |
|----------------------------------------------------------------------------------------------------------------------------------------------------------------------------------------------------|-----------|
| Compound 103.....                                                                                                                                                                                  | 46        |
| Compound 104.....                                                                                                                                                                                  | 47        |
| Compound 105.....                                                                                                                                                                                  | 47        |
| Compound 106.....                                                                                                                                                                                  | 47        |
| Compound 107.....                                                                                                                                                                                  | 48        |
| Compound 108.....                                                                                                                                                                                  | 48        |
| Compound 109.....                                                                                                                                                                                  | 48        |
| Compound 110.....                                                                                                                                                                                  | 48        |
| Compound 111.....                                                                                                                                                                                  | 49        |
| Compound 112.....                                                                                                                                                                                  | 49        |
| Compound 113.....                                                                                                                                                                                  | 49        |
| Compound 114.....                                                                                                                                                                                  | 50        |
| Compound 115.....                                                                                                                                                                                  | 50        |
| Compound 116.....                                                                                                                                                                                  | 49        |
| Compound 117 : full structural characterization.....                                                                                                                                               | 50        |
| Compound 118.....                                                                                                                                                                                  | 52        |
| Compound 119.....                                                                                                                                                                                  | 54        |
| Compound 120.....                                                                                                                                                                                  | 54        |
| Compound 121.....                                                                                                                                                                                  | 54        |
| Compound 122.....                                                                                                                                                                                  | 55        |
| Compound 123.....                                                                                                                                                                                  | 55        |
| <b>SURFACE PLASMON RESONANCE SOLUTION AFFINITY .....</b>                                                                                                                                           | <b>55</b> |
| <b>SYNTHESIS OF 8-AMINOCTYL A-D-MANNOPYRANOSIDE (5B) AS A COMPETITIVE STEADY STATE BINDER.....</b>                                                                                                 | <b>55</b> |
| <b>STEADY STATE AFFINITY MEASUREMENT WITH COMPOUND 8-AMINOCTYL A-D-MANNOPYRANOSIDE (5B) .....</b>                                                                                                  | <b>57</b> |
| <b>SOLUTION AFFINITY OF LIGANDS FOR THE FIMH ADHESIN .....</b>                                                                                                                                     | <b>57</b> |
| <b>COMPETITION METHOD .....</b>                                                                                                                                                                    | <b>57</b> |
| <b>SPR MEASUREMENTS AND SOLUTION AFFINITY FITS FOR LEAD COMPOUNDS OLIGOMANNOSE-3, N-HEPTYL A-D-MANNOPYRANOSIDE (5) AND 8-AMINOCTYL A-D-MANNOPYRANOSIDE (5A) .....</b>                              | <b>57</b> |
| <b>HAEMAGGLUTINATION INHIBITION ASSAY (HAI) .....</b>                                                                                                                                              | <b>60</b> |
| <b>COMPARISONS OF THE POTENCY OF COMPOUNDS USING INHIBITION ASSAYS BASED ON WHOLE CELL INTERACTIONS (HAI) VS BASED ON MOLECULAR INTERACTIONS EITHER VIA COMPETITION (SPR) OR DIRECT (ITC).....</b> | <b>60</b> |
| <b>MOLECULAR DYNAMICS SIMULATIONS .....</b>                                                                                                                                                        | <b>61</b> |
| <b>REFERENCES.....</b>                                                                                                                                                                             | <b>62</b> |

## Index of Figures, Tables and Movies

|                                                                                                                                                                                        |           |
|----------------------------------------------------------------------------------------------------------------------------------------------------------------------------------------|-----------|
| <b>FIGURE S1. 600 MHz <sup>1</sup>H- AND <sup>13</sup>C-NMR (CDCl<sub>3</sub>) OF 77 .....</b>                                                                                         | <b>32</b> |
| <b>FIGURE S2. 600 MHz COSY <sup>1</sup>H-NMR (CDCl<sub>3</sub>) OF 77 ILLUSTRATING THE PROTONS CORRELATION .....</b>                                                                   | <b>32</b> |
| <b>FIGURE S3. 600 MHz HMQC-NMR (CDCl<sub>3</sub>) OF 77 ILLUSTRATING THE PROTON-CARBON CORRELATION USED FOR THE TOTAL SIGNAL ASSIGNMENTS.....</b>                                      | <b>33</b> |
| <b>FIGURE S4. 600 MHz 1D-NOE NMR (CDCl<sub>3</sub>) OF 77 CLEARLY ILLUSTRATING THE CONNECTIVITY BETWEEN H1-H6A-H4, THUS ILLUSTRATING THAT IT IS IN A SKEWED-BOAT CONFORMATION.....</b> | <b>33</b> |

|                                                                                                                                                                                                                 |       |
|-----------------------------------------------------------------------------------------------------------------------------------------------------------------------------------------------------------------|-------|
| <b>FIGURE S5-S8: CONFORMATIONAL ANALYSIS OF 78</b> .....                                                                                                                                                        | 33-35 |
| <b>Figure S9-S10: Conformational analysis of 78</b> .....                                                                                                                                                       | 40    |
| <b>Figure S11-S12: Conformational analysis of 98</b> .....                                                                                                                                                      | 43-44 |
| <b>FIGURE S13.</b> 600 MHz <sup>1</sup> H-NMR (CDCl <sub>3</sub> ) OF <b>89</b> ILLUSTRATING THE COMPLETE SIGNAL ANALYSIS OF H1 AND ITS CONNECTIVITY (NOE) TO H6A AND H4, HENCE A SKEWED-BOAT CONFORMATION..... | 50    |
| <b>FIGURE S14.</b> 600 MHz <sup>1</sup> H-NMR (CDCl <sub>3</sub> ) OF <b>89</b> WITH INSET SHOWING THE EXO-METHYLENE HAB SYSTEM.....                                                                            | 51    |
| <b>FIGURE S15.</b> HIGH FIELD (900 MHz) NMR ROESY SPECTRA OF <b>117</b> IN DMSO-D <sub>6</sub> .....                                                                                                            | 51    |
| <b>FIGURE S16-S17.</b> <sup>1</sup> H-NMR ANALYSIS OF <b>117</b> IN DMSO-D <sub>6</sub> .....                                                                                                                   | 52    |
| <b>TABLE S1.</b> RESULTS FROM THE DETAILED ANALYSIS OF 117 BY 600 MHz NMR.....                                                                                                                                  | 53    |
| <b>FIGURE S18.</b> STEADY STATE AFFINITY (K <sub>b</sub> = 16.9 nM ± 0.4, CHI <sup>2</sup> = 3.37) OF FIMH LECTIN WITH <b>5b</b> .....                                                                          | 57    |
| <b>FIGURE S19.</b> INHIBITION CURVES AND FITTED EQUILIBRIUM CONSTANTS FOR LEAD COMPOUNDS WITH FIMH.....                                                                                                         | 58    |
| <b>FIGURE S20.</b> EX. OF A LINEAR TITRATION CURVE (FUCHSIA) THAT DOES NOT FOLLOW A SIGMOIDAL FIT (BLACK LINE).....                                                                                             | 59    |
| <b>TABLE S2:</b> COMPARISON OF AFFINITY TRENDS USING THREE COMPLEMENTARY METHODS.....                                                                                                                           | 60    |
| <b>FIGURE S21.</b> MOLECULAR DYNAMICS SIMULATIONS.....                                                                                                                                                          | 61    |
| <b>MOVIE S1.</b> .....                                                                                                                                                                                          | 61    |

## Index of Schemes

|                                                                                                                                                                                                                                                                                                                                                                                                                                                                                                                                                                                                                                                                                  |    |
|----------------------------------------------------------------------------------------------------------------------------------------------------------------------------------------------------------------------------------------------------------------------------------------------------------------------------------------------------------------------------------------------------------------------------------------------------------------------------------------------------------------------------------------------------------------------------------------------------------------------------------------------------------------------------------|----|
| <b>SCHEME S1.</b> REAGENTS AND CONDITIONS: I) Ar-I, Pd(OAc) <sub>2</sub> , NaHCO <sub>3</sub> , Bu <sub>4</sub> NBr, DMF, 60°C, II) MeONA, MeOH, RT, III) H <sub>2</sub> , Pd(OH) <sub>2</sub> /C MeOH, IV) R1SH, AIBN, Dioxane, 80°C.....                                                                                                                                                                                                                                                                                                                                                                                                                                       | 7  |
| <b>SCHEME S2.</b> REAGENTS AND CONDITIONS: I) Pd(PPh <sub>3</sub> ) <sub>2</sub> Cl <sub>2</sub> , R-I, Et <sub>3</sub> N, DMF, 60°C, II) MeONA, MeOH, RT; III) Pd(PPh <sub>3</sub> ) <sub>2</sub> Cl <sub>2</sub> , HC≡CCH <sub>2</sub> OH (59) OR HC≡CCH <sub>2</sub> OMe (60), Et <sub>3</sub> N, DMF, 60°C.....                                                                                                                                                                                                                                                                                                                                                              | 8  |
| <b>SCHEME S3.</b> REAGENTS AND CONDITIONS: I) R <sub>1</sub> -SO <sub>2</sub> Cl, Et <sub>3</sub> N, DMF, 60°C, II) MeONA, MeOH, RT.....                                                                                                                                                                                                                                                                                                                                                                                                                                                                                                                                         | 9  |
| <b>SCHEME S4.</b> REAGENTS AND CONDITIONS: I) O <sub>3</sub> , CH <sub>2</sub> Cl <sub>2</sub> -MeOH (8:2), -78°C, Me <sub>2</sub> S; II) Jones reagent, Acetone, RT; III) BOP, DIEPA, R <sub>1</sub> NH <sub>2</sub> , CH <sub>2</sub> Cl <sub>2</sub> , RT; IV) H <sub>2</sub> , Pd(OH) <sub>2</sub> /C MeOH; V) NH <sub>3</sub> (L), Li, THF, -78°C, then C <sub>5</sub> H <sub>5</sub> N, Ac <sub>2</sub> O; VI) R'SH, AIBN, Dioxane, 80°C; VII) MeONA, MeOH, RT; VIII) Ar-I, Pd(OAc) <sub>2</sub> , NaHCO <sub>3</sub> , Bu <sub>4</sub> NBr, DMF, 60°C; IX) O <sub>3</sub> , CH <sub>2</sub> Cl <sub>2</sub> , -78°C, Zn, AcOH; X) KMnO <sub>4</sub> , <i>t</i> -BuOH..... | 11 |
| <b>SCHEME S5.</b> REAGENTS: (I) BzCl, DMAP, Pyridine, 0° C → RT, 36 h, quant.; (II) HBr (33% in AcOH), AcOH, 0° C → RT, 36 h; (III) AgOTf, DCM, 0° C → RT, 24 h, 85% over 2 steps; (IV) NaOMe, MeOH, RT, 2 h, 95%; (V) Pd/C, H <sub>2</sub> , MeOH, (H-Cube), 80%.....                                                                                                                                                                                                                                                                                                                                                                                                           | 55 |

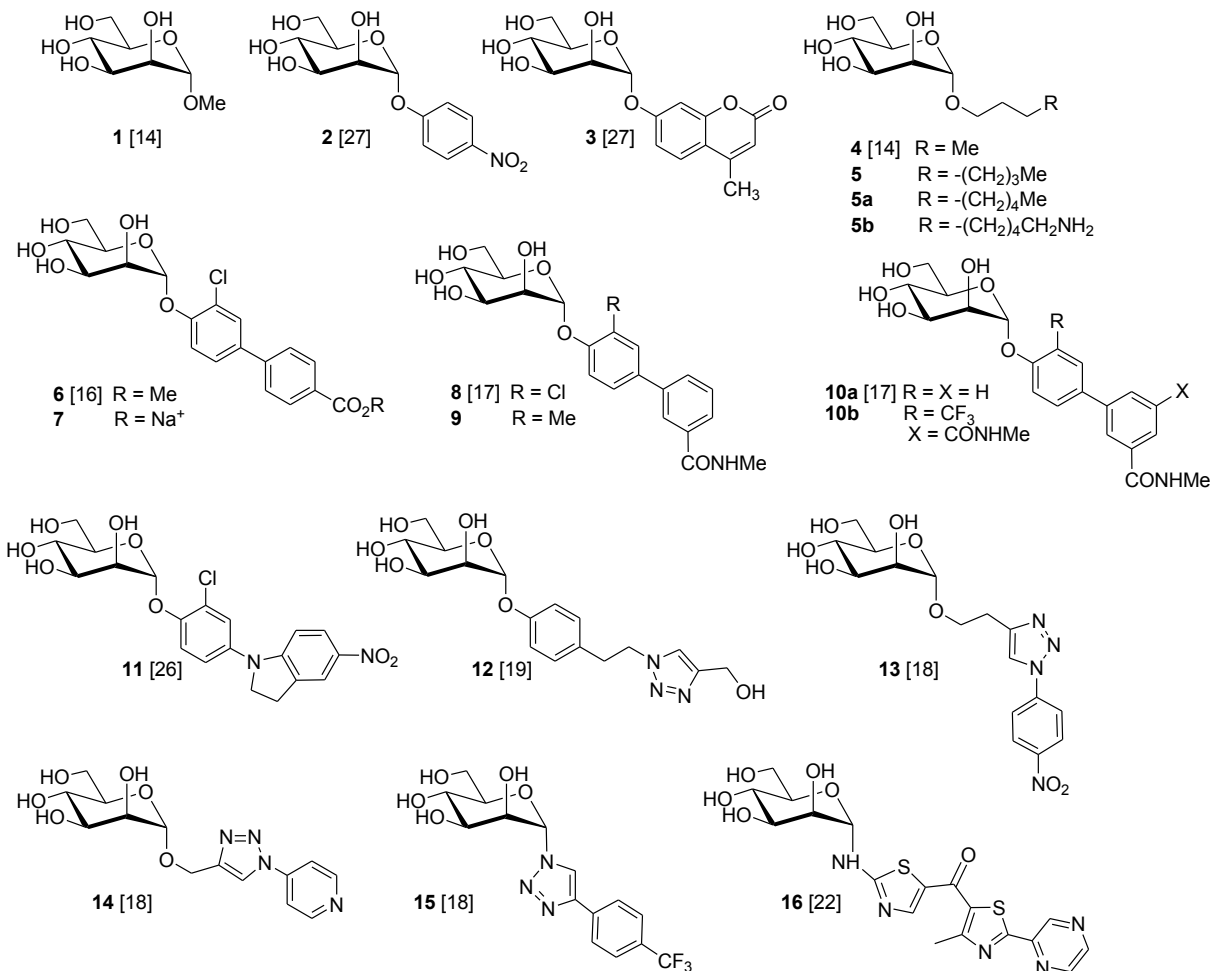

## List of known FimH ligands

## Synthesis of *O*- and *C*-linked mannopyranoside libraries

### Rational for design and results of the syntheses

As shown in **Scheme S1**, key-starting material 3-(tetra-*O*-acetyl- $\alpha$ -D-mannopyranosyl)-1-propene **17** was converted to a series of (*E*)-styrene derivatives **18-21** in good yields. All acylated *O*-glycosides **18-21** were deprotected using a catalytic amount of sodium methoxide in methanol to provide unprotected derivatives **22-25** in almost quantitative yields. Catalytic hydrogenation of **22-25** was then used to afford saturated derivatives **26-29** in good to excellent yields. In parallel, treatment of *O*-allyl mannopyranoside **17** with a series of mercaptans in the presence of AIBN (thiol-ene) gave the sulfur-containing *O*-mannopyranosides **30-34** which after de-*O*-acetylation under Zemplén conditions (MeONa, MeOH) as above provided *O*-mannopyranosides **35-39**.

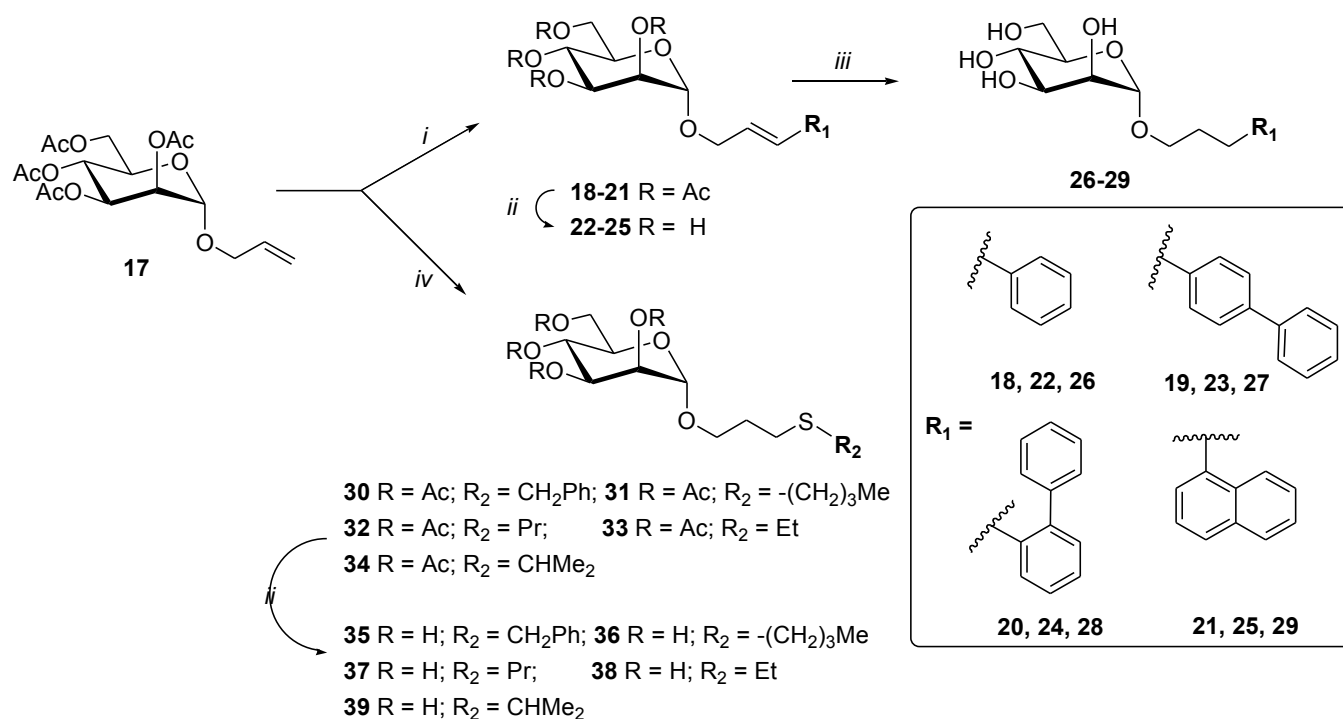

**Scheme S1.** Reagents and conditions: i), Ar-I, Pd(OAc)<sub>2</sub>, NaHCO<sub>3</sub>, Bu<sub>4</sub>NBr, DMF, 60°C, ii) MeONa, MeOH, rt, iii) H<sub>2</sub>, Pd(OH)<sub>2</sub>/C MeOH, iv) R<sub>1</sub>SH, AIBN, Dioxane, 80°C.

Given that alkyne spacers are even less flexible than the aliphatic or alkene linkages used above, we also considered using them to further exploit the relative positioning of the pharmacophoric aryl moieties within the tyrosine gate. Toward this goal, we selected alkynyl mannopyranoside **40** as the starting point for the next family of analogs. Thus, the use of Sonogashira cross-coupling conditions (triethylamine, copper iodide, (Ph<sub>3</sub>)<sub>2</sub>PdCl<sub>2</sub>) with a range of iodoaryl derivatives and prop-2-ynyl 2,3,4,6-tetra-*O*-acetyl- $\alpha$ -D-mannopyranoside **40** [2,37] resulted into *O*-glycoside derivatives **42-49** in good yields. Their usual de-*O*-acetylation (MeONa, MeOH) uneventfully afforded the desired *O*-propargyl mannopyranoside derivatives **50-57** (Scheme S2).

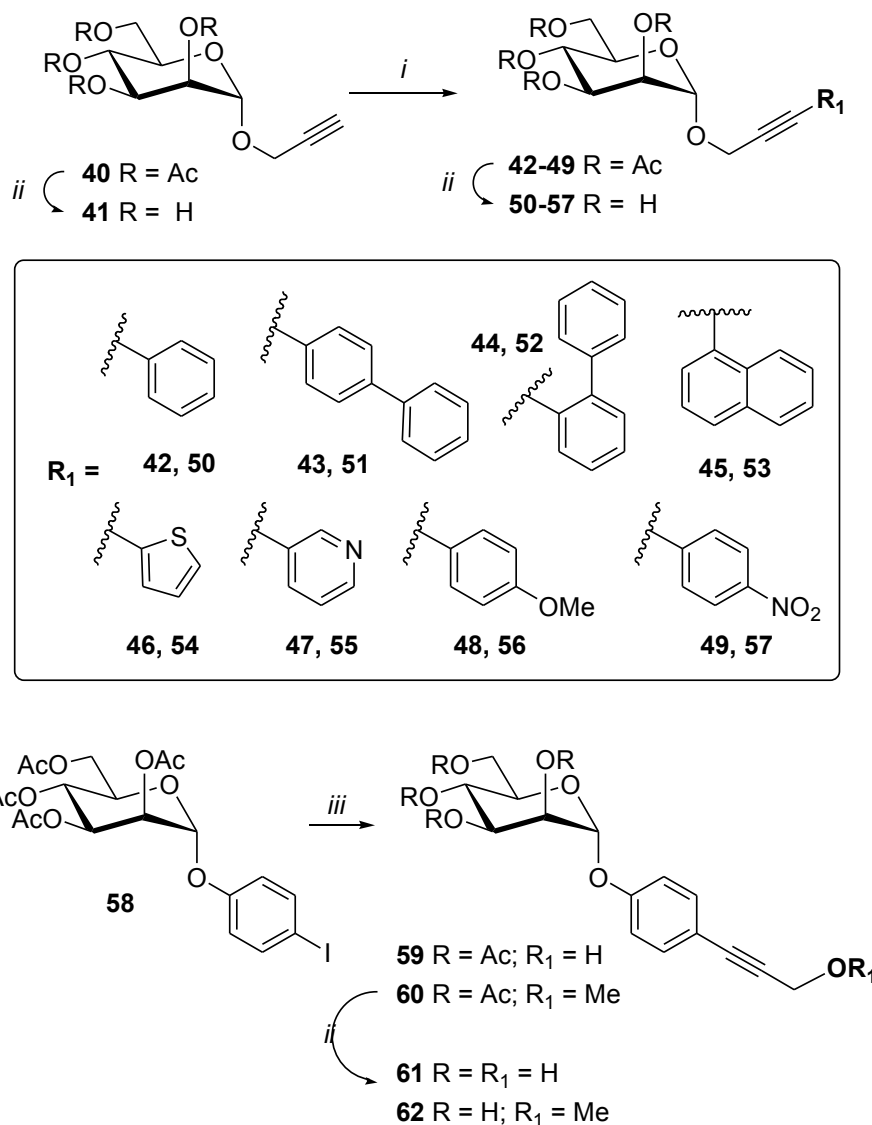

**Scheme S2.** Reagents and conditions: i)  $\text{Pd}(\text{PPh}_3)_2\text{Cl}_2$ , R-I,  $\text{Et}_3\text{N}$ , DMF,  $60^\circ\text{C}$ , ii) MeONa, MeOH, rt; iii)  $\text{Pd}(\text{PPh}_3)_2\text{Cl}_2$ ,  $\text{HC}\equiv\text{CCH}_2\text{OH}$  (**59**) or  $\text{HC}\equiv\text{CCH}_2\text{OMe}$  (**60**),  $\text{Et}_3\text{N}$ , DMF,  $60^\circ\text{C}$ .

The effect of the relative positioning of the hydrophobic aglyconic residues upon binding to FimH and its tyrosine gate in particular was further deepened by interchanging the orders of alkyne-aryl introduction. To this end, analogs **61** and **62** were synthesized from the known p-iodophenyl 2,3,4,6-tetra-O-acetyl  $\alpha$ -D-mannopyranoside **58** [38] using palladium-catalyzed Sonogashira cross-coupling (Scheme 2) and either propargyl alcohol or its methyl ether derivative.

Progressing toward the construction of other flexible O-linked ligands (family C, Figure 2), based on versatile 2-aminoethyl  $\alpha$ -D-mannopyranoside **63**, may further increase our understanding of FimH O-



mannopyranosides with enhanced potencies. To this end, we next describe our efforts in identifying a novel class of sulfonamide containing *O*-mannopyranosides (**Scheme 3**). The new *O*-linked arylsulfonamides **64-69** were accordingly prepared by treatment of 2-aminoethyl 2,3,4,6-tetra-*O*-acetyl- $\alpha$ -D-mannopyranoside **63** [39] with the respective sulfonyl chlorides (**Scheme 3**), which upon standard de-*O*-acetylation (MeONa, MeOH) provided the expected analogs **70-75**.

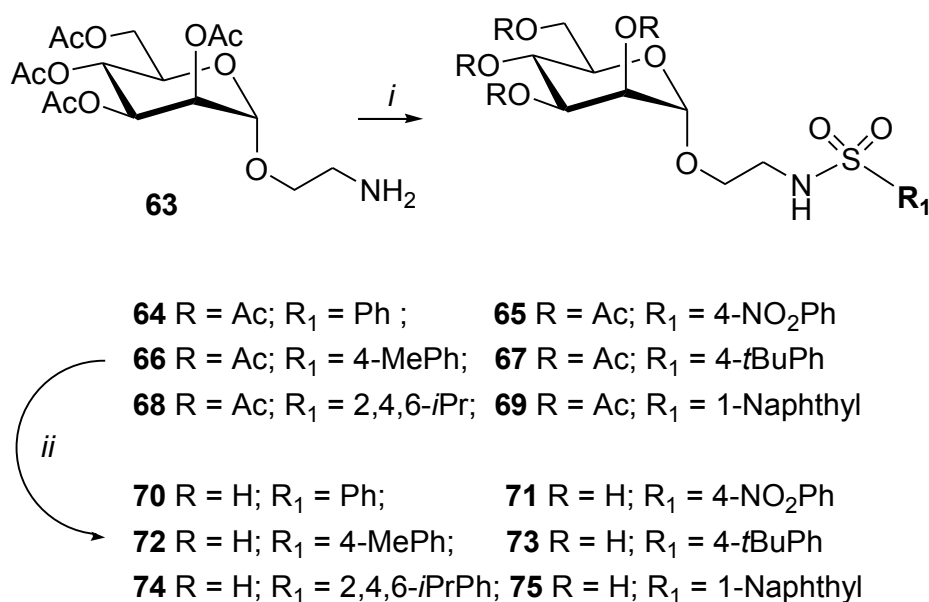

**Scheme S3.** Reagents and conditions: i) R<sub>1</sub>-SO<sub>2</sub>Cl, Et<sub>3</sub>N, DMF, 60°C, ii) MeONa, MeOH, rt.

Moving into the more biologically and chemically stable *C*-linked analogs (family D and E, **Figure 2**) and by similarity to their *O*-linked counterparts **25-29**, the next series of *C*-mannopyranoside derivatives have been synthesized according to **Scheme 4**. Key to the divergent synthesis of the inhibitors was the preparation of the peracetylated intermediate **77** from which several of the targeted compounds could be synthesized. Accordingly, *C*-allyl glycoside **77** was obtained as a pure  $\alpha$ -anomer by debenzoylation of known 3-(tetra-*O*-benzyl- $\alpha$ -D-mannopyranosyl)-1-propene **76** under Birch reduction conditions (Li, NH<sub>3</sub>) and reprotection of the resulting alcohol with acetyl groups (Ac<sub>2</sub>O, pyridine). This procedure was deemed necessary since inseparable mixture of anomers was obtained when the direct *C*-allylation was conducted from methyl tetra-*O*-acetyl- $\alpha$ -D-mannopyranoside under the Hosomi-Sakurai reaction conditions (BF<sub>3</sub>, allyl trimethylsilane) [40]. Initially, ozonolysis of perbenzylated **76** followed by treatment with Jones reagent afforded the known 2-(2,3,4,6-tetra-*O*-benzyl- $\alpha$ -D-mannopyranosyl) acetic acid **79** [41]. As shown in **Scheme 4**, coupling with a systematic series of aromatic amines produced perbenzylated amides **81-86**, which could be readily converted to their corresponding unprotected mannopyranosides **91-96** by

classical benzyl deprotection ( $\text{H}_2, \text{Pd}(\text{OH})_2/\text{C}$ ). Analogously, peracetylated derivative **77** served as precursor toward known 2-(2,3,4,6-tetra-O-acetyl- $\alpha$ -D-mannopyranosyl) acetic acid **80**. As for perbenzylated amides **81-86**, coupling with a series of aromatic amines produced peracetylated amides **87-90**, which could be readily converted to unprotected *C*-mannosides **97-100** via acetyl deprotection ( $\text{MeONa}$ ,  $\text{MeOH}$ ).

In our ongoing effort to synthesize stable *C*-mannopyranosides that might surpass the potency of lead compound **5** ( $K_d = 5$  nM), we next chose to prepare the nearest *C*-glycoside analogs **101-118** (family E, **Figure 2**) related to their *O*-linked counterparts (family A, **Figure 2**). Hence, the synthesis of sulfur-containing *C*-mannopyranosides harboring either aliphatic or aromatic substituents is summarized in **Scheme 4**. Key intermediate **77** was treated under thiol-ene conditions with a range of alkyl and aryl mercaptans in the presence of AIBN as radical initiator to give thioethers **101-105**, which upon standard de-*O*-acetylation under Zemplén conditions ( $\text{MeONa}$ ,  $\text{MeOH}$ ) afforded **106-110**. The next series was also prepared from **77** with the difference that the alkene was treated under palladium-catalyzed Heck conditions in the presence of aryl iodide to give (family E)-styrene derivatives **111-114**. Acylated glycosides **111-114** were deprotected using a catalytic amount of sodium methoxide in methanol as above to provide derivatives **115-118** in essentially quantitative yields. Finally, catalytic hydrogenation of *C*-glycosides **115-118** and **78** afforded their analogous saturated derivatives **119-122** and **123**, respectively in good yield.

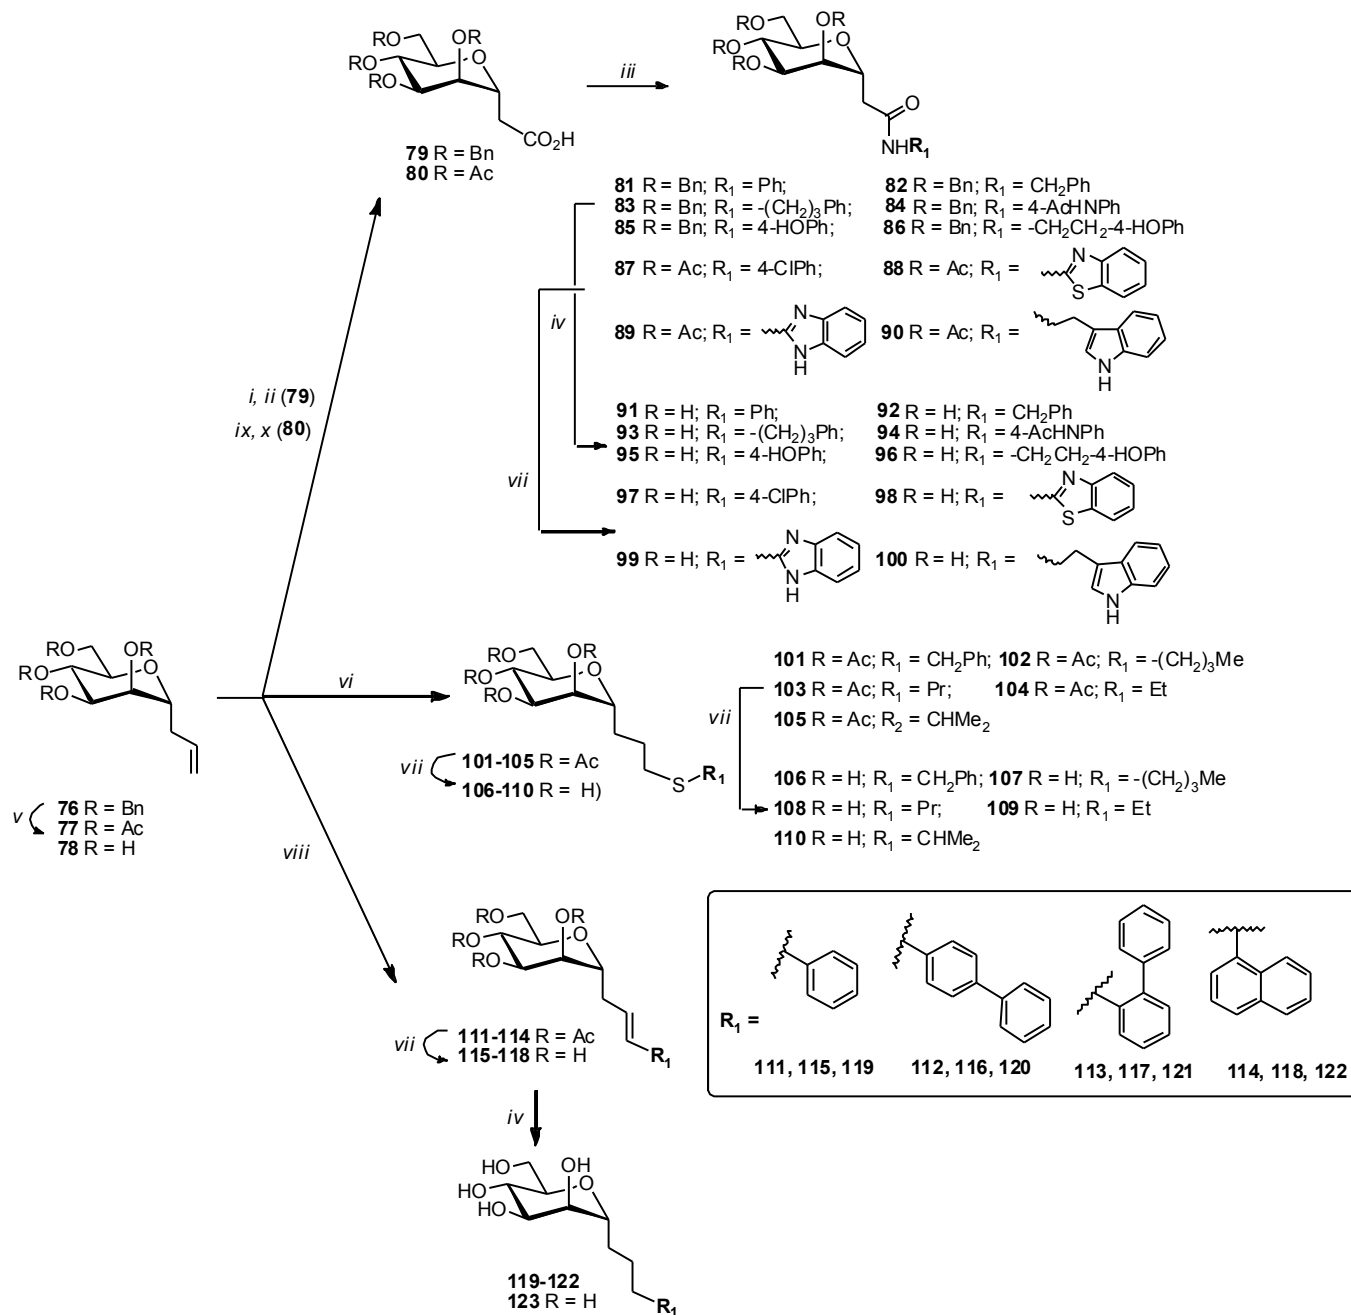

**Scheme S4.** Reagents and conditions: i) O<sub>3</sub>, CH<sub>2</sub>Cl<sub>2</sub>-MeOH (8:2), -78°C, Me<sub>2</sub>S; ii) Jones reagent, Acetone, rt; iii) BOP, DIEPA, R<sub>1</sub>NH<sub>2</sub>, CH<sub>2</sub>Cl<sub>2</sub>, rt; iv) H<sub>2</sub>, Pd(OH)<sub>2</sub>/C MeOH; v) NH<sub>3</sub>(l), Li, THF, -78°C, then C<sub>5</sub>H<sub>5</sub>N, Ac<sub>2</sub>O; vi) R'SH, AIBN, Dioxane, 80°C; vii) MeONa, MeOH, rt; viii) Ar-I, Pd(OAc)<sub>2</sub>, NaHCO<sub>3</sub>, Bu<sub>4</sub>NBr, DMF, 60°C; ix) O<sub>3</sub>, CH<sub>2</sub>Cl<sub>2</sub>, -78°C, Zn, AcOH; x) KMnO<sub>4</sub>, *t*-BuOH.

## **Full details of synthetic protocols and structural characterization for compounds 18-123**

### **General Methods**

$^1\text{H}$  NMR spectra were recorded using a Varian and Bruker ULTRASHIELD<sup>TM</sup> 300 MHz, Bruker Avance III HD 600 MHz, or Bruker Avance III 900 US2 spectrometers. Chemical shifts are reported in parts per million (d).  $^1\text{H}$  Chemical shifts in  $\text{CDCl}_3$  were referenced to the residual  $\text{CHCl}_3$  (7.27 ppm);  $^{13}\text{C}$  chemical shifts were referenced to the solvent ( $\text{CDCl}_3$ , 77.03 ppm). Where necessary, DEPT, APT, NOE, NOESY and two-dimensional  $^1\text{H}$ - $^1\text{H}$  COSY and HSQC experiments were performed for complete signal assignments. Accurate mass measurements were performed on a LC-MSD-Tof instrument from Agilent technologies in positive electrospray. Either protonated ions  $(\text{M}+\text{H})^+$  or sodium adducts  $(\text{M}+\text{Na})^+$  were used for empirical formula confirmation. Flash chromatography was performed using Merck silica gel 60 (40-63  $\mu\text{m}$ ). TLC was performed on Kieselgel 60 F254 plates from Merck. Detection was carried out under UV light or by spraying with 20% ethanolic sulfuric acid or molybdate solution followed by heating. Solvents were dried by distillation from drying agents as follows: THF and  $\text{Et}_2\text{O}$  (sodium/benzophenone),  $\text{CH}_2\text{Cl}_2$  ( $\text{P}_2\text{O}_5$ ),  $\text{Et}_3\text{N}$  and pyridine ( $\text{CaH}_2$ ).

### **General procedure of Heck coupling for synthesis of protected *O*- and *C*-mannosides 18-21, 111-114**

To a 0.16 M solution of mannoside **17** or **76** in DMF were added iodoaryl (2 equiv), 10% palladium(II) acetate, tetrabutylammonium bromide (1 equiv), and sodium bicarbonate (3 equiv). The reaction mixture was heated at 85  $^\circ\text{C}$  under  $\text{N}_2$ . The course of reaction was followed by TLC. The solution was evaporated under reduced pressure and the residue was purified by flash column chromatography on silica gel (0-20%  $\text{AcOEt}$ -Hexanes).

### **General procedure for de-*O*-acetylation**

The acetylated acetylated mannoside was dissolved in dry MeOH (3 mL), a solution of sodium methoxide (1 M in MeOH, 0.5 equiv) was added and the reaction mixture was stirred at room temperature until disappearance of the starting material. The solution was neutralized by addition of ion-exchange resin (Amberlite IR 120), filtered, washed with MeOH and then the solvent was removed in vacuo. The residue was then lyophilized to yield the fully deprotected mannoside.

### **General procedure for hydrogenation (26-29, 119-123)**

To a solution of a mixture of mannosides **22-25**, **78**, or **115-118** (0.06 mmol) in  $\text{CH}_3\text{OH}$  (1 mL) and  $\text{AcOEt}$  (1 mL) was added 20 wt % of  $\text{Pd}(\text{OH})_2/\text{C}$  (8 mg). The solution was stirred under 1 atm of  $\text{H}_2$  for 4 h at room temperature. The catalyst was then removed by filtration through celite followed by washing

with CH<sub>3</sub>OH. The filtrate was then concentrated and lyophilized to yield the fully hydrogenated mannoside.

#### **General procedure of the radical addition for synthesis of protected sulfur series 30-34, 101-105**

A mixture of allyl intermediate **17** or **77**, thiol (1.5 equiv), and AIBN (0.5 equiv) in dioxane (3 mL) was heated for 3 h at 80°C. The solution was cooled and evaporated to dryness. Sulfur derivatives were purified by column chromatography (0-20% AcOEt-Hexanes).

#### **General procedure of Sonogashira coupling for synthesis of protected *O*- and *C*-mannosides 42-49, 59-60**

To a solution of mannopyranoside **40** or **58**, dichlorobis(triphenylphosphine)palladium(II) (5 mol%) and CuI (2.5 mol%) in 3 mL of dry DMF was degassed under nitrogen atmosphere using ultrasonic cleaner. After 5 min, propargyl alcohol (2 equiv.) and triethylamine (3 mL) were added into the solution. The reaction mixture was stirred at room temperature. The TLC (hexane/AcOEt 1:1) showed the complete disappearance of the starting material. The solvent and triethylamine were evaporated under reduced pressure. AcOEt (30 mL) was added to the reaction mixture and washed with saturated aqueous NH<sub>4</sub>Cl (3x 50 mL), brine (3x 50 mL) and water (3x 50 mL). The organic layers were dried over MgSO<sub>4</sub> and evaporated under reduced pressure, the resulting crude product was purified by flash chromatography on silica gel (hexane/AcOEt 1:1) to give the desired mannoside.

#### **General procedure for synthesis of protected sulfamide series 64-69**

1-*O*-(2'-Aminoethyl)- 2,3,4,6-tetra-*O*-acetyl- $\alpha$ -d-mannopyranoside **63** and triethylamine (1.2 equiv) were dissolved in dry DCM. Sulfonyl chloride (1.2equiv per amine) was added to the mixture at 0°C. After stirring for 12 h at rt the solution was diluted with DCM and the organic layer washed with water and brine. After drying (MgSO<sub>4</sub>) and concentration, amide derivatives were purified by column chromatography (0–10% MeOH-DCM).

#### **General procedure for synthesis of protected amide series 81-98**

Mannopyranosyl acid **79** or **80**, amine derivative (1.2 equiv as free amine or HCl salt) were dissolved in dry DCM. BOP (1.2equiv per amine) and DIPEA (3 equiv) were added to the mixture. After stirring for 16h at rt the solution was diluted with DCM and the organic layer washed with 1N KHSO<sub>4</sub>, water and brine. After drying (MgSO<sub>4</sub>) and concentration, amide derivatives were purified by column chromatography (0–5% MeOH-DCM).

#### **General procedure for debenzylation: synthesis of unprotected amides series 91-96**

To a solution of a mixture of benzylated mannoside (0.06 mmol) in CH<sub>3</sub>OH (1 mL) and AcOEt (1 mL) was added 20 wt % of Pd(OH)<sub>2</sub>/C (8 mg). The solution was stirred under 1 atm of H<sub>2</sub> for 4 h at room

temperature. The catalyst was then removed by filtration through Celite followed by washing with CH<sub>3</sub>OH. The filtrate was then concentrated and lyophilized to yield the fully deprotected product in a ~90% yield.

#### **Improved procedure for the preparation of n-heptyl $\alpha$ -D-mannopyranoside 5**

A solution of D-mannose (180 mg, 1.00 mmol) and a catalytic amount of CSA in 1-heptanol (2.0 mL) was heated under reflux for 2 h. Then, the reaction was kept at 120 °C for 5 h. The crude reaction mixture was directly purified by flash chromatography on silica gel using DCM-EtOAc-MeOH 8:1:1 or CH<sub>3</sub>CN-H<sub>2</sub>O (98:2) then lyophilized to give the title compound **4** as a white solid (217 mg, 0.78 mmol, 78%).  $R_f$  = 0.20, DCM-EtOAc-MeOH 8:1:1 ;  $R_f$  = 0.33, CH<sub>3</sub>CN-H<sub>2</sub>O 98:2 ; m.p.: 64-66 °C ;  $[\alpha]_D^{23} + 58$  ( $c$ =1.0, MeOH) ; <sup>1</sup>H NMR (600 MHz, D<sub>2</sub>O, 23 °C):  $\delta$  = 4.82 (sl, 1H, H-1), 3.92 (sl, 1H, H-2), 3.88-3.68 (m, 5H, H-3, 4, 6a and OCH<sub>2</sub>), 3.55 (m, 1H, H-6b), 3.45 (m, 1H, H-5), 1.68-1.55 (m, 2H, OCH<sub>2</sub>CH<sub>2</sub>), 1.41-1.13 (m, 8H, 4 x CH<sub>2</sub>), 0.91 ppm (t, 3H, <sup>3</sup>J<sub>H-H</sub> = 6.5 Hz, CH<sub>3</sub>) ; <sup>13</sup>C NMR (150 MHz, D<sub>2</sub>O, 23 °C):  $\delta$  = 99.5 (d, <sup>1</sup>J<sub>C-1,H1</sub> = 169.3 Hz, C-1), 72.2 (C-5), 70.5 (C-2), 70.0 (C-3), 67.1 (C-4), 65.9 (OCH<sub>2</sub>), 60.2 (C-6), 31.2, 28.8, 28.6, 25.5 (4 x CH<sub>2</sub>), 22.1 (CH<sub>2</sub>CH<sub>3</sub>), 13.3 ppm (CH<sub>3</sub>). ESI<sup>+</sup>-HRMS:  $m/z$  calcd for C<sub>13</sub>H<sub>30</sub>NO<sub>6</sub> [M + NH<sub>4</sub>]<sup>+</sup>: 296.2068; found: 296.2065.

#### **Proton NMR structural analysis of all compounds**

##### **Compound 18**

Compound **18** was prepared according to general procedure for Heck cross coupling described above. Colourless oil, 102 mg, 86% yield.  $R_f$ : 0.52 (AcOEt: Hexanes 3: 7);  $[\alpha]_D^{20} + 57.5$  ( $c$  = 1, CHCl<sub>3</sub>). <sup>1</sup>H NMR (300 MHz, CDCl<sub>3</sub>):  $\delta$  7.42-7.32 (5 H, m, Har), 6.66-6.61 (1 H, d,  $J$  = 15.6 Hz, H-3'), 6.31-6.22 (1 H, m, H-2'), 5.43-5.38 (1 H, dd,  $J$  = 3.4, 10.0 Hz), 5.36-5.28 (2 H, m), 4.943-4.937 (1 H, d,  $J$  = 1.6 Hz, H-1), 4.39-4.27 (2 H, m, H-1'), 4.24-4.20 (1 H, dd,  $J$  = 6.8, 12.6 Hz), 4.15-4.10 (1 H, dd,  $J$  = 2.4, 12.3 Hz), 4.09-4.04 (1 H, m), 2.16-2.00 (12 H, 4 x s, 4 x OAc); <sup>13</sup>C NMR (75 MHz, CDCl<sub>3</sub>):  $\delta$  170.6, 169.9, 169.8, 169.7, 136.1, 134.0, 128.6, 128.0, 126.5, 123.8, 96.4, 69.6, 69.1, 68.5, 68.3, 66.1, 62.4, 20.8, 20.7, 20.6; MS (ESI): 487.32 [M+Na]<sup>+</sup>, calcd. 487.16 for C<sub>23</sub>H<sub>28</sub>O<sub>10</sub> + Na<sup>+</sup>

##### **Compound 19**

Compound **19** was prepared according to general procedure for Heck cross coupling described above. Colourless oil, 285 mg, 82% yield.  $R_f$ : 0.31 (AcOEt: Hexanes 3: 7);  $[\alpha]_D^{20} + 17.3$  ( $c$  = 1, CHCl<sub>3</sub>). <sup>1</sup>H NMR (300 MHz, CDCl<sub>3</sub>):  $\delta$  7.62-7.57 (4 H, m, Har), 7.49-7.45 (4 H, m, Har), 7.42-7.35 (1 H, m, Har), 6.66

(1H, d,  $J = 15.8$  Hz, CH=CHPh), 6.35-6.28 (1 H, m, CH=CHPh), 5.44-5.29 (3 H, m, H-4, H-3, H-2), 4.96-4.95 (1 H, d,  $J = 1.6$  Hz, H-1), 4.41-4.24 (2 H, m, H-5, H-6), 4.12-4.04 (3 H, m, H-6, OCH<sub>2</sub>), 2.17, 2.13, 2.08, 2.06 (12 H, 4 x s, 4 x OAc); <sup>13</sup>C NMR (75 MHz, CDCl<sub>3</sub>):  $\delta$  171.4, 170.7, 170.4, 170.2, 133.6, 128.8, 127.4, 127.3, 127.0, 126.9, 123.9, 118.5, 96.5, 69.6, 69.1, 68.6, 68.4, 66.2, 62.5, 20.9, 20.9, 20.7, 20.7; MS (ESI): 563.3 [M+Na]<sup>+</sup>, calcd. 563.2 for C<sub>29</sub>H<sub>32</sub>O<sub>10</sub> + Na<sup>+</sup>

### Compound 20

Compound **20** was prepared according to general procedure for Heck cross coupling described above. Colourless oil, 281 mg, 81% yield. Rf: 0.27 (AcOEt: Hexanes 3: 7);  $[\alpha]_D^{20} +44.3$  ( $c = 1$ , CHCl<sub>3</sub>). <sup>1</sup>H NMR (300 MHz, CDCl<sub>3</sub>):  $\delta$  7.65-7.62 (1 H, m, Har), 7.42-7.29 (8 H, m, Har), 6.61 (1H, d,  $J = 15.9$  Hz, CH=CHPh), 6.25-6.16 (1 H, m, CH=CHPh), 5.41-5.26 (3 H, m, H-4, H-3, H-2), 4.88-4.78 (1 H, m, H-1), 4.29-4.25 (2 H, m, H-5, H-6), 4.14-3.79 (3 H, m, H-6, OCH<sub>2</sub>), 2.15, 2.11, 2.08, 2.06 (12 H, 4 x s, 4 x OAc); <sup>13</sup>C NMR (75 MHz, CDCl<sub>3</sub>):  $\delta$  170.57, 169.96, 169.78, 169.68, 141.04, 134.11, 133.29, 130.17, 129.70, 128.04, 127.89, 127.49, 127.07, 126.16, 124.78, 96.42, 69.61, 69.06, 68.57, 68.48, 66.19, 62.48, 20.83, 20.64, 20.58; MS (ESI): 563.3 [M+Na]<sup>+</sup>, calcd. 563.2 for C<sub>29</sub>H<sub>32</sub>O<sub>10</sub> + Na<sup>+</sup>

### Compound 21

Compound **21** was prepared according to general procedure for Heck cross coupling described above. Colourless oil, 430 mg, 93% yield. Rf: 0.52 (CH<sub>2</sub>Cl<sub>2</sub>-acetone 96:4);  $[\alpha]_D^{20} +19.3$  ( $c = 1$ , CHCl<sub>3</sub>). <sup>1</sup>H NMR (300 MHz, CDCl<sub>3</sub>):  $\delta$  8.10 (2 H, d,  $J = 7.7$  Hz, Har), 7.87-7.79 (2 H, m, Har), 7.63-7.37 (5 H, m, 4 Har, CH=CHPh), 6.33-6.28 (1 H, m, CH=CHPh), 5.47-5.43 (3 H, m, H-4, H-3, H-2), 5.02-5.01 (1 H, m, H-1), 4.46-4.31 (2 H, m, H-5, H-6), 4.18-4.09 (3 H, m, H-6, OCH<sub>2</sub>), 2.19, 2.15, 2.09, 2.03 (12 H, 4 x s, 4 x OAc); <sup>13</sup>C NMR (75 MHz, CDCl<sub>3</sub>):  $\delta$  170.62, 170.0, 169.85, 169.63, 142.64, 140.31, 133.08, 131.04, 128.49, 128.26, 127.61, 127.13, 126.78, 125.51, 123.94, 109.42, 96.49, 69.61, 68.82, 68.35, 66.14, 62.47, 61.85, 20.85, 20.79, 20.69, 20.64; HRMS (ESI): 537.1722 [M+Na]<sup>+</sup>, calcd. 537.1731 for C<sub>27</sub>H<sub>30</sub>O<sub>10</sub> + Na<sup>+</sup>

### Compound 22

Compound **22** was prepared according to general procedure of de-*O*-acetylation described above. 33 mg, 95% yield.  $[\alpha]_D^{20} +80.2$  ( $c = 1$ , CH<sub>3</sub>OH). <sup>1</sup>H NMR (300 MHz, CD<sub>3</sub>OD):  $\delta$  7.41-7.38 (2 H, m, Har), 7.31-7.21 (3 H, m, Har), 6.66-6.61 (1 H, d,  $J = 15.9$  Hz, CH=CHPh), 6.37-6.28 (1 H, td,  $J = 6.0, 15.9$  Hz, CH=CHPh), 4.86 (1 H, H-1), 4.39-4.32 (1 H, d,  $J = 1.4$  Hz, H-1), 4.20-4.13 (1 H, ddd,  $J = 12.9, 6.5$  Hz, H-6), 3.88-3.81 (2 H, m, H-5, H-2), 3.77-3.70 (3 H, m, H-6, H-4, H-3), 3.66-3.60 (2 H, m, OCH<sub>2</sub>); <sup>13</sup>C

NMR (75 MHz, CDCl<sub>3</sub>):  $\delta$  138.1, 133.9, 129.6, 128.7, 127.5, 126.3, 100.7, 74.7, 72.6, 72.2, 68.6, 62.9; HMS (ESI): 319.1150 [M+Na]<sup>+</sup>, calcd. 319.1152 for C<sub>15</sub>H<sub>20</sub>O<sub>6</sub> + Na<sup>+</sup>

### Compound 23

Compound **23** was prepared according to general procedure of de-*O*-acetylation described above. 22.5 mg, 94% yield.  $[\alpha]_D^{20} +55.8$  ( $c = 1$ , CH<sub>3</sub>OH). <sup>1</sup>H NMR (300 MHz, DMSO-d<sub>6</sub>):  $\delta$  7.68-7.32 (9 H, m, Har), 6.64 (1 H, d,  $J = 16.2$  Hz, CH=CHPh), 6.49-6.40 (1 H, m, CH=CHPh), 4.75-4.73 (1 H, m, H-1), 4.59-4.49 (2 H, m, H-2, H-3), 4.32-4.26 (1 H, m, H-4), 4.15-4.08 (1 H, m, H-6), 3.71-3.65 (3 H, m, H-5, OCH<sub>2</sub>), 3.48-3.42 (1 H, m, H-6); <sup>13</sup>C NMR (75 MHz, DMSO-d<sub>6</sub>):  $\delta$  139.59, 139.22, 135.54, 131.07, 128.94, 127.46, 126.96, 126.82, 126.45, 99.21, 74.15, 71.01, 70.32, 67.07, 66.62, 61.31, HRMS (ESI): 359.1470 [M+Na]<sup>+</sup>, calcd. 359.1465 for C<sub>21</sub>H<sub>24</sub>O<sub>6</sub> + Na<sup>+</sup>

### Compound 24

Compound **24** was prepared according to general procedure of de-*O*-acetylation described above. 38 mg, 93% yield.  $[\alpha]_D^{20} +68.3$  ( $c = 1$ , CH<sub>3</sub>OH). <sup>1</sup>H NMR (300 MHz, DMSO-d<sub>6</sub>):  $\delta$  7.65-7.61 (1H, m, Har), 7.44-7.23 (8 H, m, Har), 6.58 (1 H, d,  $J = 15.9$  Hz, CH=CHPh), 6.29-6.21 (1 H, m, CH=CHPh), 4.79 (1 H, d,  $J = 1.6$  Hz, H-1), 4.25 (1 H, dd,  $J = 12.9, 5.6$  Hz, H-6), 4.05 (1 H, dd,  $J = 12.9, 6.3$  Hz, H-5), 3.80 (1 H, dd,  $J = 2.4, 11.8$  Hz, H-2), 3.75-3.49 (3 H, m, H-6, H-4, H-3), 3.33-3.31 (2 H, m, OCH<sub>2</sub>); <sup>13</sup>C NMR (75 MHz, DMSO-d<sub>6</sub>):  $\delta$  142.31, 142.19, 135.85, 132.54, 131.09, 130.74, 129.21, 128.70, 128.59, 128.19, 127.37, 127.12, 100.67, 74.67, 72.58, 72.58, 72.16, 68.61; HRMS (ESI): 395.1470 [M+Na]<sup>+</sup>, calcd. 395.1465 for C<sub>21</sub>H<sub>24</sub>O<sub>6</sub> + Na<sup>+</sup>

### Compound 25

Compound **25** was prepared according to general procedure of de-*O*-acetylation described above. 166 mg, 90% yield. R<sub>f</sub>: 0.32 (CH<sub>2</sub>Cl<sub>2</sub>-acetone-MeOH 8:1:1);  $[\alpha]_D^{20} +48.2$  ( $c = 1$ , CH<sub>3</sub>OH). <sup>1</sup>H NMR (300 MHz, CDCl<sub>3</sub>):  $\delta$  8.17-8.07 (1 H, m, Har), 7.93-7.83 (2 H, m, Har), 7.80-7.69 (1 H, m, Har), 7.58-7.29 (3 H, m, Har), 6.76 (1 H, d,  $J = 15.6$  Hz, CH=CHPh), 6.51-6.32 (1 H, m, CH=CHPh), 4.88-4.82 (1 H, m, H-1), 4.62-4.53 (3 H, m, H-2, H-3, H-4), 4.22-4.13 (1 H, m, H-6), 3.79-3.69 (3 H, m, H-5, OCH<sub>2</sub>), 3.53-3.49 (1 H, m, H-6); <sup>13</sup>C NMR (75 MHz, CDCl<sub>3</sub>):  $\delta$  133.96, 133.63, 133.41, 131.49, 128.45, 128.13, 126.37, 126.14, 125.77, 123.53, 99.40, 72.44, 71.61, 71.01, 68.09, 66.22, 60.97 ppm ; HRMS (ESI): 369.1305 [M+Na]<sup>+</sup>, calcd. 369.1309 for C<sub>19</sub>H<sub>22</sub>O<sub>6</sub> + Na<sup>+</sup>



### Compound 26

Compound **26** was prepared according to general procedure of hydrogenation described above. 36 mg, 97% yield.  $[\alpha]_D^{20} +46.4$  ( $c = 1$ , CH<sub>3</sub>OH). <sup>1</sup>H NMR (300 MHz, CD<sub>3</sub>OD):  $\delta$  7.27-7.14 (5 H, m, Har), 4.723-4.718 (1 H, d,  $J = 1.73$  Hz, H-1), 3.81-3.59 (7 H, m, OCH<sub>2</sub>, H-6, H-4, H-3, H-2), 3.55-3.52 (1 H, m, H-5), 2.71-2.65 (2 H, m, OCH<sub>2</sub>CH<sub>2</sub>CH<sub>2</sub>), 1.93-1.86 (2 H, m, OCH<sub>2</sub>CH<sub>2</sub>CH<sub>2</sub>); <sup>13</sup>C NMR (75 MHz, CD<sub>3</sub>OD):  $\delta$  143.1, 129.4, 129.4, 126.8, 101.6, 74.6, 72.7, 72.2, 68.6, 67.8, 62.8, 33.4, 32.4; HRMS (ESI): 321.1301 [M+Na]<sup>+</sup>, calcd. 321.1308 for C<sub>15</sub>H<sub>22</sub>O<sub>6</sub> + Na<sup>+</sup>

### Compound 27

Compound **27** was prepared according to general procedure of hydrogenation described above. 63 mg, 91% yield.  $[\alpha]_D^{20} +21.8$  ( $c = 1$ , CH<sub>3</sub>OH). <sup>1</sup>H NMR (300 MHz, DMSO-d<sub>6</sub>):  $\delta$  7.47 (1 H, d,  $J = 7.9$  Hz, Har), 7.41 (1 H, d,  $J = 7.7$  Hz, Har), 3.27 (4 H, t,  $J = 7.8$  Hz, Har), 7.18-7.11 (3 H, m, Har), 4.63-4.60 (1 H, m, H-1), 4.58-4.52 (2 H, m, H-2, H-3), 4.29 (1 H, bs, H-4), 3.45-3.17 (4 H, m, 2 H-6, H-5, OCH<sub>2</sub>), 2.53-2.46 (2 H, m, OCH<sub>2</sub>CH<sub>2</sub>CH<sub>2</sub>), 1.72-1.65 (2 H, m, OCH<sub>2</sub>CH<sub>2</sub>CH<sub>2</sub>); <sup>13</sup>C NMR (75 MHz, DMSO-d<sub>6</sub>):  $\delta$  140.99, 140.09, 137.67, 128.90, 128.88, 127.14, 126.59, 126.47, 99.88, 74.03, 71.01, 70.39, 66.99, 61.24, 31.44, 30.76; HRMS (ESI): 397.1632 [M+Na]<sup>+</sup>, calcd. 397.1621 for C<sub>21</sub>H<sub>26</sub>O<sub>6</sub> + Na<sup>+</sup>

### Compound 28

Compound **28** was prepared according to general procedure of hydrogenation described above. 63 mg, 91% yield.  $[\alpha]_D^{20} +19.6$  ( $c = 1$ , CH<sub>3</sub>OH). <sup>1</sup>H NMR (300 MHz, DMSO-d<sub>6</sub>):  $\delta$  7.45-7.15 (9 H, m, Har), 4.48 (1 H, m, bs, H-1), 3.61-3.35 (4 H, m, H-5, H-4, H-3, H-2), 3.24-3.13 (4 H, m, H-6, OCH<sub>2</sub>), 2.62-2.48 (2 H, m, OCH<sub>2</sub>CH<sub>2</sub>CH<sub>2</sub>), 1.67-1.61 (2 H, m, OCH<sub>2</sub>CH<sub>2</sub>CH<sub>2</sub>); <sup>13</sup>C NMR (75 MHz, DMSO-d<sub>6</sub>):  $\delta$  141.32, 141.22, 129.76, 129.28, 128.87, 128.19, 127.43, 126.91, 125.88, 99.65, 73.86, 70.96, 70.27, 66.97, 65.59, 61.18, 30.51, 29.17; HRMS (ESI): 397.1609 [M+Na]<sup>+</sup>, calcd. 397.1621 for C<sub>21</sub>H<sub>26</sub>O<sub>6</sub> + Na<sup>+</sup>

### Compound 29

Compound **29** was prepared according to general procedure of hydrogenation described above. 18.5 mg, 93% yield.  $[\alpha]_D^{20} +52.3$  ( $c = 1$ , CH<sub>3</sub>OH). <sup>1</sup>H NMR (300 MHz, DMSO-d<sub>6</sub>):  $\delta$  8.07-8.04 (1 H, m, Har), 7.83-7.67 (2 H, m, Har), 7.51-7.38 (1 H, m, Har), 7.09-6.98 (3 H, m, Har), 4.87-4.83 (1 H, m, H-1), 3.87-3.76 (4 H, m, H-2, H-3, H-4, H-6), 3.74-3.58 (4 H, m, H-5, H-6, OCH<sub>2</sub>), 2.77-2.62 (2 H, m, OCH<sub>2</sub>CH<sub>2</sub>CH<sub>2</sub>), 1.77-1.72 (2 H, m, OCH<sub>2</sub>CH<sub>2</sub>CH<sub>2</sub>); <sup>13</sup>C NMR (75 MHz, DMSO-d<sub>6</sub>):  $\delta$  140.95, 139.18,

138.22, 137.96, 135.43, 129.96, 128.40, 128.07, 127.26, 124.74, 101.54, 74.62, 72.25, 68.07, 62.83, 34.44, 24.64; HRMS (ESI): 371.1462  $[M+Na]^+$ , calcd. 371.1465 for  $C_{19}H_{24}O_6 + Na^+$

### Compound 30

Compound **30** was prepared according to general procedure of radical addition described above. 274 mg, 83% yield. Rf: 0.19 (AcOEt: Hexanes 3: 7);  $[\alpha]_D^{20} +29.6$  ( $c = 1$ ,  $CHCl_3$ ).  $^1H$  NMR (300 MHz,  $CDCl_3$ ):  $\delta$  7.36-7.21 (5 H, m, Ph), 5.33-5.23 (2 H, m, H-3, H-4), 5.22 (1 H, dd,  $J = 1.9, 3.3$  Hz, H-2), 4.77 (1 H, d,  $J = 1.6$  Hz, H-1), 4.27 (1 H, dd,  $J = 5.2, 12.3$  Hz, H-6), 4.09 (1 H, dd,  $J = 2.2, 12.1$  Hz, H-6), 3.97-3.93 (1 H, m, H-5), 3.80-3.73 (1 H, m, OCHH), 3.70 (2 H, s,  $SCH_2$ ), 3.52-3.45 (1 H, m, OCHH), 2.51 (2 H, t,  $J = 7.1$  Hz,  $CH_2S$ ), 2.15-1.99 (12 H, 4 x s, 4 x OAc), 1.86-1.81 (2 H, m,  $OCH_2CH_2$ );  $^{13}C$  NMR (75 MHz,  $CDCl_3$ ):  $\delta$  170.48, 169.88, 169.71, 169.55, 138.16, 128.66, 128.36, 126.85, 97.41, 69.38, 68.93, 68.35, 66.41, 65.95, 62.26, 36.06, 28.49, 27.66, 20.74, 20.59, 20.53; MS (ESI): 535.4  $[M+Na]^+$ , calcd. 535.5 for  $C_{24}H_{32}O_{10}S + Na^+$

### Compound 31

Compound **31** was prepared according to general procedure of radical addition described above. 114 mg, 88% yield. Rf: 0.22 (AcOEt: Hexanes 4: 6);  $[\alpha]_D^{20} +38.4$  ( $c = 1$ ,  $CHCl_3$ ).  $^1H$  NMR (300 MHz,  $CDCl_3$ ):  $\delta$  5.32 (1 H, dd,  $J = 3.5, 9.6$  Hz, H-4), 5.30-5.22 (2 H, m, H-, H-2), 4.81-4.80 (1 H, d,  $J = 1.6$  Hz, H-1), 4.28 (1 H, dd,  $J = 5.2, 12.3$  Hz, H-6), 4.10 (1 H, dd,  $J = 2.4, 12.3$  Hz, H-6), 4.02-3.97 (1 H, m, H-5), 3.81 (1 H, dt,  $J = 6.0, 9.6$  Hz, OCHH), 3.53 (1 H, dt,  $J = 6.0, 9.7$  Hz, OCHH), 2.61 (2 H, t,  $J = 6.6$  Hz,  $CH_2S$ ), 2.52 (2 H, t,  $J = 7.1$  Hz,  $SCH_2$ ), 2.15-1.99 (12 H, 4 x s, 4 x OAc), 1.94-1.85 (2 H, m,  $OCH_2CH_2$ ), 1.61-1.51 (2 H, m,  $SCH_2CH_2$ ), 1.46-1.36 (2 H, m,  $SCH_2CH_2CH_2$ ), 0.91 (3 H, t,  $J = 7.4$  Hz,  $SCH_2CH_2CH_2CH_3$ );  $^{13}C$  NMR (75 MHz,  $CDCl_3$ ):  $\delta$  170.64, 170.04, 169.86, 169.70, 97.56, 69.56, 69.08, 68.48, 66.56, 66.12, 62.42, 31.77, 31.65, 28.98, 28.53, 21.95, 20.85, 20.72, 20.66, 13.63; MS (ESI): 501.29  $[M+Na]^+$ , calcd. 501.18 for  $C_{21}H_{34}O_{10}S + Na^+$

### Compound 32

Compound **32** was prepared according to general procedure of radical addition described above. 220 mg, 73% yield. Rf: 0.22 (AcOEt: Hexanes 3: 7);  $[\alpha]_D^{20} +42.8$  ( $c = 1$ ,  $CHCl_3$ ).  $^1H$  NMR (300 MHz,  $CDCl_3$ ):  $\delta$  5.29-5.18 (3 H, m, H-2, H-3, H-4), 4.77 (1 H, s, H-1), 4.23 (1 H, dd,  $J = 3.8, 11.0$  Hz, H-6), 4.06 (1 H, d,  $J = 12.1$  Hz, H-6), 3.98-3.94 (1 H, m, H-5), 3.82-3.74 (1 H, m, OCHH), 3.53-3.46 (1 H, m, OCHH), 2.56 (2 H, t,  $J = 8.1$  Hz,  $CH_2S$ ), 2.47-2.42 (2 H, m,  $SCH_2$ ), 2.11-1.94 (12 H, 4 x s, 4 x OAc), 1.88-1.82 (2 H, dd,  $J$

= 6.6, 12.3 Hz, OCH<sub>2</sub>CH<sub>2</sub>), 1.60-1.53 (2 H, dd, J = 7.7, 14.56 Hz, CH<sub>2</sub>CH<sub>3</sub>), 0.97-0.92 (3 H, t, J = 7.42 Hz, CH<sub>2</sub>CH<sub>3</sub>); <sup>13</sup>C NMR (75 MHz, CDCl<sub>3</sub>): δ 170.48, 169.89, 169.72, 169.56, 97.42, 69.42, 68.95, 68.36, 66.39, 65.98, 62.28, 33.99, 28.86, 28.32, 22.74, 20.73, 20.60, 20.53, 13.32; MS (ESI): 465.1 [M+H]<sup>+</sup>, calcd. 464.9 for C<sub>20</sub>H<sub>32</sub>O<sub>10</sub>S + H<sup>+</sup>

### Compound 33

Compound **33** was prepared according to general procedure of radical addition described above. 112.5 mg, 88% yield. Rf: 0.19 (AcOEt: Hexanes 3: 7); [α]<sub>D</sub><sup>20</sup> +48.4 (c = 1, CHCl<sub>3</sub>). <sup>1</sup>H NMR (300 MHz, CDCl<sub>3</sub>): δ 5.33-5.20 (3 H, m, H-2, H-3, H-4), 4.79 (1 H, d, J = 1.65 Hz, H-1), 4.26 (1 H, dd, J = 5.2, 12.3 Hz, H-6), 4.09 (1 H, dd, J = 2.2, 12.1 Hz, H-6), 4.01-3.95 (1 H, m, H-5), 3.80 (1 H, dt, J = 5.7, 9.9 Hz, OCHH), 3.52 (1 H, dt, J = 6.0, 9.8 Hz, OCHH), 2.60 (2 H, t, J = 6.6 Hz, SCH<sub>2</sub>CH<sub>3</sub>), 2.52 (2 H, dd, J = 7.4, 14.5 Hz, OCH<sub>2</sub>CH<sub>2</sub>CH<sub>2</sub>), 2.14-1.97 (12 H, 4 x s, 4 x OAc), 1.93-1.83 (2 H, m, OCH<sub>2</sub>CH<sub>2</sub>), 1.24 (3 H, t, J = 6.6 Hz, SCH<sub>2</sub>CH<sub>3</sub>); <sup>13</sup>C NMR (75 MHz, CDCl<sub>3</sub>): δ 170.57, 169.98, 169.81, 169.65, 97.50, 69.51, 69.03, 68.46, 66.50, 66.08, 62.38, 28.87, 27.98, 25.80, 20.80, 20.67, 20.60, 20.61, 14.63; MS (ESI): 473.31 [M+Na]<sup>+</sup>, calcd. 473.14 for C<sub>19</sub>H<sub>30</sub>O<sub>10</sub>S + Na<sup>+</sup>

### Compound 34

Compound **34** was prepared according to general procedure of radical addition described above. 245 mg, 82% yield. Rf: 0.19 (AcOEt: Hexanes 3: 7); [α]<sub>D</sub><sup>20</sup> +30.4 (c = 1, CHCl<sub>3</sub>). <sup>1</sup>H NMR (300 MHz, CDCl<sub>3</sub>): δ 5.31 (1 H, dd, J = 3.57, 9.89 Hz, H-4), 5.29-5.25 (1 H, m, H-3), 5.21 (1 H, dd, J = 1.6, 3.3 Hz, H-2), 4.79 (1 H, d, J = 1.9 Hz, H-1), 4.29-4.23 (1H, dd, J = 5.5, 12.3 Hz, H-6), 4.12-4.07 (1 H, dd, J = 2.2, 13.1 Hz, H-6), 4.02-3.97 (1 H, m, H-5), 3.81 (1 H, dt, J = 6.8, 9.6 Hz, OCHH), 3.51 (1 H, dt, J = 6.3, 9.8 Hz, OCHH), 2.89 (1 H, q, J = 7.6 Hz, SCH), 2.61 (2 H, dt, J = 2.2, 7.4 Hz, CH<sub>2</sub>S), 2.14-1.97 (12 H, 4 x s, 4 x OAc), 1.93-1.82 (2 H, m, OCH<sub>2</sub>CH<sub>2</sub>), 1.25 (6 H, dd, J = 1.1, 6.8 Hz, 2 x CH<sub>3</sub>); <sup>13</sup>C NMR (75 MHz, CDCl<sub>3</sub>): δ 170.57, 169.99, 169.81, 169.65, 97.48, 69.52, 69.04, 68.44, 66.51, 66.08, 62.37 (OCH<sub>2</sub>), 34.80 (SCH), 29.09, 26.87, 23.29, 23.28, 20.82, 20.69, 20.62; MS (ESI): 465.0 [M+H]<sup>+</sup>, calcd. 464.9 for C<sub>20</sub>H<sub>32</sub>O<sub>10</sub>S + H<sup>+</sup>

### Compound 35

Compound **35** was prepared according to general procedure of de-O-acetylation described above. 35 mg, 91% yield. [α]<sub>D</sub><sup>20</sup> +46.6 (c = 1, CH<sub>3</sub>OH). <sup>1</sup>H NMR (300 MHz, D<sub>2</sub>O): δ 6.99-6.89 (5 H, m, Har), 4.57 (1 H, m, H-1), 3.71-3.54 (6 H, m, 2 H-6, H-5, H-2, OCH<sub>2</sub>), 3.45-3.42 (2 H, m, H-4, H-3), 3.34 (2 H, s, CH<sub>2</sub>Ph),

2.16 (2 H, t,  $J = 6.8$  Hz,  $\text{CH}_2\text{S}$ ), 1.52-1.48 (2 H, m,  $\text{OCH}_2\text{CH}_2$ );  $^{13}\text{C}$  NMR (75 MHz,  $\text{D}_2\text{O}$ ):  $\delta$  134.93, 128.41, 128.04, 126.51, 99.32, 72.23, 70.41, 69.80, 65.99, 65.43, 60.30, 34.96, 28.10, 27.12; HRMS (ESI): 367.1187  $[\text{M}+\text{Na}]^+$ , calcd. 367.1185 for  $\text{C}_{16}\text{H}_{24}\text{O}_6\text{S} + \text{Na}^+$

### Compound 36

Compound **36** was prepared according to general procedure of de-*O*-acetylation described above. 59 mg, 92% yield.  $[\alpha]_{\text{D}}^{20} +19.6$  ( $c = 1$ ,  $\text{CH}_3\text{OH}$ ).  $^1\text{H}$  NMR (300 MHz,  $\text{D}_2\text{O}$ ):  $\delta$  4.74 (1 H, bs, H-1), 3.80-3.79 (1 H, m, H-6), 3.70-3.55 (5 H, m, H-6, H-4, H-3, H-2), 3.47-3.42 (2 H, m,  $\text{OCH}_2$ ), 2.49 (2 H, t,  $J = 7.1$  Hz,  $\text{CH}_2\text{S}$ ), 2.42 (2 H, t,  $J = 7.3$  Hz,  $\text{SCH}_2$ ), 1.79-1.74 (2 H, m,  $\text{OCH}_2\text{CH}_2$ ), 1.49-1.40 (2 H, m,  $\text{SCH}_2\text{CH}_2$ ), 1.34-1.25 (2 H, m,  $\text{SCH}_2\text{CH}_2\text{CH}_2$ ), 0.79 (3 H, t,  $J = 7.4$  Hz,  $\text{CH}_3$ );  $^{13}\text{C}$  NMR (75 MHz,  $\text{D}_2\text{O}$ ):  $\delta$  99.45, 72.26, 70.36, 69.81, 65.99, 65.68, 60.30, 30.95, 30.80, 28.63, 27.79, 21.27, 12.92; HRMS (ESI): 333.1342  $[\text{M}+\text{Na}]^+$ , calcd. 333.1342 for  $\text{C}_{13}\text{H}_{26}\text{O}_6\text{S} + \text{Na}^+$

### Compound 37

Compound **37** was prepared according to general procedure of de-*O*-acetylation described above. 66 mg, 92% yield.  $[\alpha]_{\text{D}}^{20} +19.3$  ( $c = 1$ ,  $\text{CH}_3\text{OH}$ ).  $^1\text{H}$  NMR (300 MHz,  $\text{D}_2\text{O}$ ):  $\delta$  4.71 (1 H, bs, H-1), 3.79-3.75 (3 H, m, H-6, H-5, H-2), 3.71-3.63 (3 H, m, H-6, H-4, H-3), 3.59-3.41 (2 H, m,  $\text{OCH}_2$ ), 2.51 (2H, t,  $J = 7.1$  Hz,  $\text{OCH}_2\text{CH}_2\text{CH}_2$ ), 2.41 (2 H, t,  $J = 7.2$  Hz,  $\text{SCH}_2\text{CH}_2\text{CH}_3$ ), 1.78-1.74 (2 H, m,  $\text{OCH}_2\text{CH}_2\text{CH}_2$ ), 1.52-1.39 (2 H, m,  $\text{SCH}_2\text{CH}_2\text{CH}_3$ ), 0.81 (3 H, t,  $J = 7.2$  Hz,  $\text{SCH}_2\text{CH}_2\text{CH}_3$ );  $^{13}\text{C}$  NMR (75 MHz,  $\text{D}_2\text{O}$ ):  $\delta$  99.31, 72.29, 70.21, 69.67, 66.21, 65.70, 60.41, 32.92, 28.23, 27.39, 21.87, 12.36; HRMS (ESI): 297.1375  $[\text{M}+\text{H}]^+$ , calcd. 297.1366 for  $\text{C}_{12}\text{H}_{24}\text{O}_6\text{S} + \text{H}^+$

### Compound 38

Compound **38** was prepared according to general procedure of de-*O*-acetylation described above. 52 mg, 93% yield.  $[\alpha]_{\text{D}}^{20} +21.8$  ( $c = 1$ ,  $\text{CH}_3\text{OH}$ ).  $^1\text{H}$  NMR (300 MHz,  $\text{D}_2\text{O}$ ):  $\delta$  4.73 (1 H, bs, H-1), 3.81-3.79 (2 H, m, H-6, H-2), 3.77-3.60 (4 H, m, H-6, H-5, H-4, H-3), 3.53-3.43 (2 H, m,  $\text{OCH}_2$ ), 2.53 (2 H, t,  $J = 7.1$  Hz,  $\text{OCH}_2\text{CH}_2\text{CH}_2$ ), 2.45 (2 H, q,  $J = 7.4$  Hz,  $\text{SCH}_2\text{CH}_3$ ), 1.82-1.73 (2 H, m,  $\text{OCH}_2\text{CH}_2\text{CH}_2$ ), 1.10 (3 H, t,  $J = 7.4$  Hz,  $\text{SCH}_2\text{CH}_3$ );  $^{13}\text{C}$  NMR (75 MHz,  $\text{D}_2\text{O}$ ):  $\delta$  99.27, 72.28, 70.21, 69.66, 66.22, 65.71, 60.42, 28.13, 26.93, 24.73, 13.51; HRMS (ESI): 305.1034  $[\text{M}+\text{Na}]^+$ , calcd. 305.1020 for  $\text{C}_{11}\text{H}_{22}\text{O}_6\text{S} + \text{Na}^+$

### Compound 39

Compound **39** was prepared according to general procedure of de-*O*-acetylation described above. 131 mg, 94% yield.  $[\alpha]_D^{20} +41.2$  ( $c = 1$ , CH<sub>3</sub>OH). <sup>1</sup>H NMR (300 MHz, D<sub>2</sub>O):  $\delta$  4.72 (1 H, bs, H-1), 3.80-3.78 (1 H, m, H-6), 3.75 (1 H, dd,  $J = 9.8, 7.9$  Hz, H-2), 3.69-3.61 (2 H, m, H-6, H-5), 3.57-3.41 (2 H, m, H-4, H-3), 2.88 (1 H, sep,  $J = 6.8$  Hz, SCH), 2.54 (2 H, t,  $J = 7.4$  Hz, CH<sub>2</sub>S), 1.78-1.75 (2 H, m, OCH<sub>2</sub>CH<sub>2</sub>), 1.25 (6 H, d,  $J = 6.6$  Hz, 2 x CH<sub>3</sub>); <sup>13</sup>C NMR (75 MHz, D<sub>2</sub>O):  $\delta$  99.29, 72.25, 70.15, 69.61, 66.17, 65.77, 60.37, 34.14, 28.33, 25.93, 22.06; HRMS (ESI): 319.1191 [M+Na]<sup>+</sup>, calcd. 319.1185 for C<sub>12</sub>H<sub>24</sub>O<sub>6</sub>S + Na<sup>+</sup>

Compound **40** was prepared according to a published procedure [1].

### Compound 41

Compound **41** was prepared according to general procedure of de-*O*-acetylation described above. White solid, mp 122-123 °C, 93 mg, 83% yield.  $[\alpha]_D^{20} +19.6$  ( $c = 1$ , CH<sub>3</sub>OH). <sup>1</sup>H NMR (300 MHz, CD<sub>3</sub>OD):  $\delta$  4.95 (1 H, d,  $J = 1.4$  Hz, H-1), 4.26 (2 H, d,  $J = 2.4$  Hz OCH<sub>2</sub>), 3.85-3.77 (2 H, m, H-6, H-5), 3.72-3.65 (2 H, m, H-6, H-2), 3.57-3.49 (2 H, m, H-4, H-3); <sup>13</sup>C NMR (75 MHz, CD<sub>3</sub>OD):  $\delta$  99.8, 80.0, 75.9, 75.1, 72.5, 72.0, 68.5, 62.8, 54.8; MS (ESI): calcd for C<sub>9</sub>H<sub>14</sub>O<sub>6</sub>Na [M + Na]<sup>+</sup> : 241.1 ; found : 241.1.

### Compound 42

Compound **42** was prepared according to general procedure for Sonogashira coupling described above. Colourless oil, 08 mg, 82% yield. Rf: 0.19 (AcOEt: Hexanes 3: 7);  $[\alpha]_D^{20} +18.3$  ( $c = 1$ , CHCl<sub>3</sub>). <sup>1</sup>H NMR (300 MHz, CDCl<sub>3</sub>):  $\delta$  7.46-7.43 (2 H, m, Har), 7.34-7.29 (3 H, m, Har), 5.39 (1 H, dd,  $J = 10.1, 3.4$  Hz, H-3), 5.37-5.29 (2 H, m, H-4, H-2), 5.12 (1 H, bs, H-1), 4.50 (2 H, s, OCH<sub>2</sub>), 4.31 (1 H, dd,  $J = 12.1, 5.2$  Hz, H-6), 4.14-4.05 (2 H, m, H-6, H-5), 2.17, 2.09, 2.03, 2.01 (12 H, 4 x s, 4 x OAc); <sup>13</sup>C NMR (75 MHz, CDCl<sub>3</sub>):  $\delta$  170.64, 169.92, 169.84, 169.69, 131.81, 128.75, 128.32, 122.05, 96.19, 87.14, 83.10, 69.42, 68.98, 68.95, 66.04, 62.32, 55.70, 20.86, 20.69, 20.67, 20.64; MS (ESI): 485.41 [M+Na]<sup>+</sup>, calcd. 485.14 for C<sub>23</sub>H<sub>26</sub>O<sub>10</sub> + Na<sup>+</sup>

### Compound 43

Compound **43** was prepared according to general procedure for Sonogashira cross coupling described above. Colourless oil, 148 mg, 71% yield. Rf: 0.23 (AcOEt: Hexanes 3: 7);  $[\alpha]_D^{20} +12.7$  ( $c = 1$ , CHCl<sub>3</sub>). <sup>1</sup>H NMR (300 MHz, CDCl<sub>3</sub>):  $\delta$  7.79-7.34 (9H, m, Har), 5.44-5.30 (3H, m, H-3, 4, 2), 5.15 (1H, d,  $J = 1.6$

Hz, H-1), 4.53 (2H, s,  $\text{OCH}_2$ ), 4.33 (1H, dd,  $J = 12.2, 5.0$  Hz, H-6a), 4.17-4.07 (2H, m, H-6b and H-5), 2.18, 2.11, 2.06, 2.01 (12H, 4 x s, OAc) ;  $^{13}\text{C}$  NMR (75 MHz,  $\text{CDCl}_3$ ):  $\delta$  170.6, 169.9, 169.8, 169.7, 141.5, 140.2, 138.2, 132.2, 128.8, 127.7, 127.0, 120.9, 96.2, 87.0, 83.7, 69.4, 69.0, 69.0, 66.1, 62.3, 55.8, 20.9, 20.7, 20.7, 20.6; MS (ESI): 561.18  $[\text{M}+\text{Na}]^+$ , calcd. 561.18 for  $\text{C}_{29}\text{H}_{30}\text{O}_{10} + \text{Na}^+$

#### Compound 44

Compound **44** was prepared according to general procedure for Sonogashira cross coupling described above. Colourless oil, 88 mg, 66% yield. Rf: 0.19 (AcOEt: Hexanes 3: 7);  $[\alpha]_D^{20} +19.8$  ( $c = 1$ ,  $\text{CHCl}_3$ ).  $^1\text{H}$  NMR (300 MHz,  $\text{CDCl}_3$ ):  $\delta$  7.57-7.54 (3 H, m, Har), 7.44-7.29 (6 H, m, Har), 5.33 (1 H, dd,  $J = 10.1, 2.9$  Hz, H-3), 5.28-5.25 (2 H, m, H-4, H-2), 4.93 (1 H, d,  $J = 1.6$  Hz, H-1), 4.38 (2 H, s,  $\text{OCH}_2$ ), 4.25 (1 H, dd,  $J = 12.1, 5.1$  Hz, H-6), 4.03 (1 H, dd,  $J = 12.4, 2.3$  Hz, H-5), 3.97-3.93 (1 H, m, H-6), 2.17, 2.05, 2.03, 2.01 (12 H, 4 x s, 4 x OAc);  $^{13}\text{C}$  NMR (75 MHz,  $\text{CDCl}_3$ ):  $\delta$  170.59, 169.81, 169.65, 143.99, 142.16, 133.21, 129.50, 129.09, 128.90, 127.91, 127.51, 126.99, 120.38, 95.89, 86.76, 85.83, 69.28, 69.03, 68.80, 65.95, 62.28, 55.41, 20.86, 20.65, 20.63; MS (ESI): 561.31  $[\text{M}+\text{Na}]^+$ , calcd. 561.17 for  $\text{C}_{29}\text{H}_{30}\text{O}_{10} + \text{Na}^+$

#### Compound 45

Compound **45** was prepared according to general procedure for Sonogashira cross coupling described above. Colourless oil, 144 mg, 72% yield. Rf: 0.19 (AcOEt: Hexanes 3: 7);  $[\alpha]_D^{20} +22.3$  ( $c = 1$ ,  $\text{CHCl}_3$ ).  $^1\text{H}$  NMR (300 MHz,  $\text{CDCl}_3$ ):  $\delta$  8.28 (1 H, d,  $J = 7.9$  Hz, Har), 7.84 (2 H, d,  $J = 8.2$  Hz, Har), 7.59-7.40 (3 H, m, Har), 5.41 (1 H, dd,  $J = 9.8, 3.1$  Hz, H-3), 5.37-5.29 (2 H, m, H-4, H-2), 5.23 (1 H, d,  $J = 1.4$  Hz, H-1), 4.66 (2 H, s,  $\text{OCH}_2$ ), 4.32 (1 H, dd,  $J = 12.6, 5.2$  Hz, H-6), 4.16-4.12 (2 H, m, H-5, H-6), 2.16, 2.10, 2.05, 2.01 (12 H, 4 x s, 4 x OAc);  $^{13}\text{C}$  NMR (75 MHz,  $\text{CDCl}_3$ ):  $\delta$  170.59, 169.87, 169.83, 169.65, 133.21, 133.02, 130.89, 129.23, 128.23, 126.93, 126.45, 125.91, 125.08, 119.63, 96.24, 78.89, 85.23, 69.42, 68.99, 66.02, 62.30, 55.84, 20.82, 20.64, 20.62; MS (ESI): 513.18  $[\text{M}+\text{H}]^+$ , calcd. 513.17 for  $\text{C}_{27}\text{H}_{28}\text{O}_{10} + \text{H}^+$

#### Compound 46

Compound **46** was prepared according to general procedure for Sonogashira cross coupling described above. Colourless oil, 65 mg, 53% yield. Rf: 0.27 (AcOEt: Hexanes 1: 1);  $[\alpha]_D^{20} +43.6$  ( $c = 1$ ,  $\text{CHCl}_3$ ).  $^1\text{H}$  NMR (300 MHz,  $\text{CDCl}_3$ ):  $\delta$  7.26-7.21 (1 H, m, H-3'), 7.23-7.21 (1 H, m, H-5'), 6.97-6.93 (1 H, m, H-4'), 5.35 (1 H, dd,  $J = 10.1, 3.2$  Hz, H-3), 5.37-5.26 (2 H, m, H-4, H-2), 5.06 (1 H, d,  $J = 1.1$  Hz, H-1), 4.48 (2 H, s,  $\text{OCH}_2$ ), 4.32 (1 H, dd,  $J = 12.3, 4.9$  Hz, H-6), 4.08 (1 H, dd,  $J = 12.1, 2.4$  Hz, H-5), 4.07-4.04 (1 H, m,

H-6), 2.14, 2.11, 2.05, 2.02 (12 H, 4 x s, 4 x OAc);  $^{13}\text{C}$  NMR (75 MHz,  $\text{CDCl}_3$ ):  $\delta$  170.45, 169.81, 169.74, 169.59, 132.84, 127.77, 126.93, 121.79, 96.28, 87.15, 80.37, 69.26, 68.91, 65.89, 62.19, 55.73, 20.77, 20.63, 20.59, 20.55; MS (ESI): 491.34  $[\text{M}+\text{Na}]^+$ , calcd. 491.10 for  $\text{C}_{21}\text{H}_{24}\text{O}_{10}\text{S} + \text{Na}^+$

### Compound 47

Compound **47** was prepared according to general procedure for Sonogashira cross coupling described above. Colourless oil, 112 mg, 94% yield. Rf: 0.27 (AcOEt: Hexanes 1: 1);  $[\alpha]^{20}_{\text{D}} +13.7$  ( $c = 1$ ,  $\text{CHCl}_3$ ).  $^1\text{H}$  NMR (300 MHz,  $\text{CDCl}_3$ ):  $\delta$  8.61 (1H, d,  $J = 1.3$  Hz, Har), 8.49 (1H, dd,  $J = 4.9, 1.5$  Hz, Har), 7.68 (1H, m, Har), 7.23-7.19 (1H, m, Har), 5.34-5.21 (3H, m, H-3,4,2), 5.04 (1H, d,  $J = 1.5$  Hz, H-1), 4.45 (2H, m,  $\text{OCH}_2$ ), 4.24 (1H, dd,  $J = 12.2, 5.1$  Hz, H-6a), 4.08-3.97 (2H, m, H-6b and H-5), 2.10, 2.03, 1.99, 1.93 (4 x s, OAc);  $^{13}\text{C}$  NMR (75 MHz,  $\text{CDCl}_3$ ):  $\delta$  170.5, 169.9, 169.8, 169.6, 152.3, 150.0, 138.8, 123.0, 119.2, 96.1, 86.6, 83.8, 69.3, 69.0, 68.8, 65.9, 62.2, 55.4, 20.8, 20.6, 20.6, 20.6; MS (ESI): 464.32  $[\text{M}+\text{H}]^+$ , calcd. 464.16 for  $\text{C}_{22}\text{H}_{25}\text{NO}_{10} + \text{H}^+$

### Compound 48

Compound **48** was prepared according to general procedure for Sonogashira cross coupling described above. Colourless oil, 81 mg, 63% yield. Rf: 0.21 (AcOEt: Hexanes 3: 7);  $[\alpha]^{20}_{\text{D}} +31.6$  ( $c = 1$ ,  $\text{CHCl}_3$ ).  $^1\text{H}$  NMR (300 MHz,  $\text{CDCl}_3$ ):  $\delta$  7.38 (2 H, dd,  $J = 6.8, 2.2$  Hz, Har), 6.83 (2 H, dd,  $J = 6.8, 2.2$  Hz, Har), 5.37 (1 H, dd,  $J = 9.9, 3.3$  Hz, H-3), 5.34-5.30 (2 H, m, H-4, H-2), 5.11 (1 H, d,  $J = 1.6$  Hz, H-1), 4.48 (2 H, s,  $\text{OCH}_2$ ), 4.29 (1 H, dd,  $J = 12.6, 5.2$  Hz, H-6), 4.13-4.03 (2 H, m, H-6, H-5), 3.81 (3 H, s,  $\text{OCH}_3$ ), 2.16, 2.08, 2.04, 2.01 (12 H, 4 x s, 4 x OAc);  $^{13}\text{C}$  NMR (75 MHz,  $\text{CDCl}_3$ ):  $\delta$  170.64, 169.91, 169.83, 169.68, 159.92, 133.34, 114.08, 113.93, 96.10, 87.13, 81.73, 69.43, 69.01, 68.89, 66.02, 62.30, 55.78, 55.24, 20.85, 20.69, 20.66, 20.63; MS (ESI): 515.27  $[\text{M}+\text{Na}]^+$ , calcd. 515.15 for  $\text{C}_{24}\text{H}_{28}\text{O}_{11} + \text{Na}^+$

### Compound 49

Compound **49** was prepared according to general procedure for Sonogashira cross coupling described above. Colourless oil, 187 mg, 85% yield. Rf: 0.13 (AcOEt: Hexanes 3: 7);  $[\alpha]^{20}_{\text{D}} +24.8$  ( $c = 1$ ,  $\text{CHCl}_3$ ).  $^1\text{H}$  NMR (300 MHz,  $\text{CDCl}_3$ ):  $\delta$  8.19 (2 H, dd,  $J = 6.8, 2.2$  Hz, Har), 7.60 (2 H, dd,  $J = 6.8, 2.2$  Hz, Har), 5.38 (1 H, dd,  $J = 9.8, 3.1$  Hz, H-3), 5.35-5.29 (2 H, m, H-4, H-2), 5.09 (1 H, d,  $J = 1.6$  Hz, H-1), 4.58-4.46 (2 H, bs,  $\text{OCH}_2$ ), 4.30 (1 H, dd,  $J = 12.3, 5.1$  Hz, H-6), 4.12 (1 H, dd,  $J = 12.3, 2.4$  Hz, H-5), 4.07-4.02 (1 H, m, H-6), 3.81 (3 H, s,  $\text{OCH}_3$ ), 2.17, 2.11, 2.05, 2.02 (12 H, 4 x s, 4 x OAc);  $^{13}\text{C}$  NMR (75 MHz,  $\text{CDCl}_3$ ):  $\delta$  170.54, 169.95, 169.85, 169.62, 147.39, 132.55, 128.82, 123.57, 96.23, 88.40, 85.19, 69.35, 69.07,

68.801, 65.93, 62.26, 55.39, 20.84, 20.68, 20.64, 20.62; MS (ESI): 530.32  $[M+Na]^+$ , calcd. 530.13 for  $C_{23}H_{25}NO_{12} + Na^+$

### Compound 50

Compound **50** was prepared according to general procedure of de-*O*-acetylation described above. 12 mg, 86% yield.  $[\alpha]_D^{20} +43.2$  ( $c = 1$ ,  $CH_3OH$ ).  $^1H$  NMR (300 MHz,  $CD_3OD$ ):  $\delta$  7.43-7.38 (2 H, m, Har), 7.35-7.31 (3 H, m, Har), 5.03 (1 H, d,  $J = 1.6$  Hz, H-1), 4.49 (2 H, s,  $OCH_2$ ), 3.87-3.82 (2 H, m, H-6, H-5), 3.74-3.63 (2 H, m, H-6, H-2), 3.60-3.53 (2 H, m, H-4, H-3);  $^{13}C$  NMR (75 MHz,  $CD_3OD$ ):  $\delta$  132.69, 129.66, 129.50, 123.88, 99.97, 87.08, 85.43, 75.14, 72.51, 72.08, 68.48, 62.84, 55.54; MS (ESI): 611.30  $[M+Na]^+$ , calcd. 611.21 for  $C_{15}H_{18}O_6 + Na^+$

### Compound 51

Compound **51** was prepared according to general procedure of de-*O*-acetylation described above. 69 mg, 87% yield.  $[\alpha]_D^{20} +19.2$  ( $c = 1$ ,  $CH_3OH$ ).  $^1H$  NMR (300 MHz,  $DMSO-d_6$ ):  $\delta$  7.70-7.67 (3 H, m, Har), 7.55-7.35 (6 H, m, Har), 4.85 (1 H, bs, H-1), 4.54-4.52 (2 H, m,  $OCH_2$ ), 3.71-3.64 (2 H, m, H-6, H-5), 3.49-3.35 (4 H, m, H-6, H-4, H-3, H-2);  $^{13}C$  NMR (75 MHz,  $DMSO-d_6$ ):  $\delta$  140.37, 139.07, 132.09, 129.05, 127.94, 126.89, 126.67, 120.82, 98.36, 86.34, 85.40, 74.51, 70.94, 70.12, 66.87, 61.14, 53.73; HRMS (ESI): 393.1313  $[M+Na]^+$ , calcd. 393.1308 for  $C_{21}H_{22}O_6 + Na^+$

### Compound 52

Compound **52** was prepared according to general procedure of de-*O*-acetylation described above. 49 mg, 91% yield.  $[\alpha]_D^{20} +9.1$  ( $c = 1$ ,  $CH_3OH$ ).  $^1H$  NMR (300 MHz,  $CD_3OD$ ):  $\delta$  7.54-7.51 (3 H, m, Har), 7.44-7.28 (6 H, m, Har), 4.91 (1 H, d,  $J = 1.6$  Hz, H-1), 4.36 (2 H, bs,  $OCH_2$ ), 3.80 (1 H, dd,  $J =$  Hz, H-5), 3.76-3.70 (2 H, m, H-6, H-2), 3.64-3.46 (3 H, m, H-6, H-4, H-3);  $^{13}C$  NMR (75 MHz,  $CD_3OD$ ):  $\delta$  145.37, 141.73, 134.27, 130.58, 130.16, 129.94, 129.12, 128.65, 128.18, 122.04, 99.64, 88.45, 86.73, 75.01, 72.50, 72.03, 68.45, 62.81, 55.26; MS (ESI): 339.40  $[M+Na]^+$ , calcd. 339.39 for  $C_{21}H_{22}O_6 + Na^+$

### Compound 53

Compound **53** was prepared according to general procedure of de-*O*-acetylation described above. 69 mg, 87% yield.  $[\alpha]_D^{20} +21.3$  ( $c = 1$ ,  $CH_3OH$ ).  $^1H$  NMR (300 MHz,  $CD_3OD$ ):  $\delta$  8.17 (1 H, dd,  $J = 7.9, 0.8$  Hz, Har), 7.78-7.72 (2 H, m, Har), 7.55 (1 H, dd,  $J = 7.1, 1.1$  Hz, Har), 7.49-7.30 (3 H, m, Har), 5.04 (1 H, d,  $J = 1.6$  Hz, H-1), 4.56 (2 H, s,  $OCH_2$ ), 3.79-3.75 (2 H, m, H-6, H-5), 3.67-3.60 (2 H, m, H-6, H-2), 3.58-3.52



(2 H, m, H-4, H-3);  $^{13}\text{C}$  NMR (75 MHz,  $\text{CD}_3\text{OD}$ ):  $\delta$  134.66, 134.53, 132.61, 131.73, 130.16, 129.43, 129.23, 129.15, 128.76, 127.97, 127.76, 127.58, 126.82, 126.27, 121.27, 100.06, 90.54, 85.06, 75.22, 72.55, 72.12, 68.50, 62.86, 55.70, 55.63; HRMS (ESI): 345.13329  $[\text{M}+\text{H}]^+$ , calcd. 345.13326 for  $\text{C}_{21}\text{H}_{22}\text{O}_6 + \text{H}^+$

#### Compound 54

Compound **54** was prepared according to general procedure of de-*O*-acetylation described above. 37 mg, 92% yield.  $[\alpha]_D^{20} +41.2$  ( $c = 1$ ,  $\text{CH}_3\text{OH}$ ).  $^1\text{H}$  NMR (300 MHz,  $\text{CD}_3\text{OD}$ ):  $\delta$  7.41-7.38 (1 H, m, H-3'), 7.23-7.21 (1 H, m, H-5'), 7.01-6.98 (1 H, m, H-4'), 5.0 (1 H, d,  $J = 1.4$  Hz, H-1), 4.51 (2 H, s,  $\text{OCH}_2$ ), 3.78-3.81 (2 H, m, H-6, H-5), 3.72-3.63 (2 H, m, H-6, H-2), 3.57-3.52 (2 H, m, H-4, H-3);  $^{13}\text{C}$  NMR (75 MHz,  $\text{CD}_3\text{OD}$ ):  $\delta$  133.67, 128.84, 128.16, 123.44, 100.08, 89.42, 80.25, 75.15, 72.49, 72.03, 68.43, 62.80, 55.63; MS (ESI): 323.30  $[\text{M}+\text{Na}]^+$ , calcd. 323.32 for  $\text{C}_{13}\text{H}_{16}\text{O}_6\text{S} + \text{Na}^+$

#### Compound 55

Compound **55** was prepared according to general procedure of de-*O*-acetylation described above. 29 mg, 93% yield.  $[\alpha]_D^{20} +46.2$  ( $c = 1$ ,  $\text{CH}_3\text{OH}$ ).  $^1\text{H}$  NMR (300 MHz,  $\text{CD}_3\text{OD}$ ):  $\delta$  8.62-8.52 (2 H, m, H-3', H-6'), 7.88 (1 H, d,  $J = 7.7$  Hz, H-4'), 7.44-7.41 (1 H, m, H-5'), 5.02 (1 H, bs, H-1), 4.53 (2 H, s,  $\text{OCH}_2$ ), 3.85 (1 H, dd,  $J = 9.1, 1.9$  Hz, H-5), 3.73-3.64 (2 H, m, H-6, H-2), 3.63-3.57 (3 H, m, H-6, H-4, H-3);  $^{13}\text{C}$  NMR (75 MHz,  $\text{CD}_3\text{OD}$ ):  $\delta$  - 152.60, 149.48, 140.76, 125.13, 100.23, 89.71, 83.24, 75.22, 72.47, 72.00, 68.46, 62.85, 55.45, 30.73; MS (ESI): 296.40  $[\text{M}+\text{H}]^+$ , calcd. 296.30 for  $\text{C}_{14}\text{H}_{17}\text{NO}_6 + \text{H}^+$

#### Compound 56

Compound **56** was prepared according to general procedure of de-*O*-acetylation described above. 26 mg, 93% yield.  $[\alpha]_D^{20} +11.7$  ( $c = 1$ ,  $\text{CH}_3\text{OH}$ ).  $^1\text{H}$  NMR (300 MHz,  $\text{CD}_3\text{OD}$ ):  $\delta$  7.34 (2 H, d,  $J = 8.7$  Hz, Har), 6.86 (2 H, d,  $J = 8.7$  Hz, Har), 5.03 (1 H, bs, H-1), 4.65 (2 H, s,  $\text{OCH}_2$ ), 3.86-3.82 (2 H, m, H-6, H-5), 3.78 (3 H, s,  $\text{OCH}_3$ ), 3.73-3.63 (2 H, m, H-6, H-2), 3.60-3.55 (2 H, m, H-4, H-3);  $^{13}\text{C}$  NMR (75 MHz,  $\text{CD}_3\text{OD}$ ):  $\delta$  161.85, 134.08, 115.88, 113.58, 99.46, 86.68, 83.96, 74.78, 72.29, 72.06, 68.12, 62.53, 56.06, 55.94; MS (ESI): 347.4  $[\text{M}+\text{Na}]^+$ , calcd. 347.1 for  $\text{C}_{16}\text{H}_{20}\text{O}_7 + \text{Na}^+$

#### Compound 57

Compound **57** was prepared according to general procedure of de-*O*-acetylation described above. 77.8 mg, 88% yield.  $[\alpha]_D^{20} +22.3$  ( $c = 1$ ,  $\text{CH}_3\text{OH}$ ).  $^1\text{H}$  NMR (300 MHz,  $\text{CD}_3\text{OD}$ ):  $\delta$  8.22 (2 H, d,  $J = 8.2$  Hz,

Har), 7.66 (2 H, d,  $J = 8.2$  Hz, Har), 5.01 (1 H, d,  $J = 1.6$  Hz, H-1), 4.55 (2 H, s,  $\text{OCH}_2$ ), 3.87-3.82 (2 H, m, H-6, H-5), 3.73-3.67 (2 H, m, H-6, H-2), 3.58-3.56 (2 H, m, H-4, H-3);  $^{13}\text{C}$  NMR (75 MHz,  $\text{CD}_3\text{OD}$ ):  $\delta$  - 148.79, 133.70, 130.55, 124.673, 100.325, 90.90, 85.21, 75.24, 72.48, 72.01, 68.47, 62.85, 55.48; MS (ESI): 3632.3  $[\text{M}+\text{Na}]^+$ , calcd. 362.1 for  $\text{C}_{15}\text{H}_{17}\text{NO}_8 + \text{Na}^+$

### Compound 59

Compound **59** was prepared according to general procedure for Sonogashira coupling described above 106 mg, 98%.  $R_f = 0.28$  (hexane/AcOEt 1:1); mp 63-64°C;  $[\alpha]_D^{20} +70.3$  ( $c$  1.0,  $\text{CHCl}_3$ ).  $^1\text{H}$  NMR ( $\text{CDCl}_3$ )  $\delta$  7.38 (d, 2H,  $J = 8.8$  Hz, Har), 7.03 (d, 2H,  $J = 8.8$  Hz, Har), 5.54 (dd, 1H,  $J = 3.3, 10.0$  Hz, H-3), 5.52 (d, 1H,  $J = 1.9$  Hz, H-1), 5.43 (dd, 1H,  $J_{1,2} 1.9$  Hz,  $J = 3.3$  Hz, H-2), 5.35 (t, 1H,  $J = 10.0$  Hz, H-4), 4.48 (d, 2H,  $J = 6.1$  Hz,  $\text{CCH}_2\text{O}$ ), 4.27 (dd, 1H,  $J = 5.9, 12.6$  Hz, H-6a), 4.08-4.03 (m, 2H, H-5 and H-6b), 1.94 (t, 1H,  $J = 6.1$  Hz, OH), 2.20, 2.05, 2.04, 2.03 ppm (4s, 4x3H,  $\text{COCH}_3$ );  $^{13}\text{C}$  NMR ( $\text{CDCl}_3$ )  $\delta$  170.5, 170.0, 169.9, 169.7, 155.5, 133.2, 117.2, 116.4, 95.6, 86.7, 84.9, 69.2, 69.2, 68.7, 65.8, 62.0, 51.5, 20.8-20.6 ppm; MS (ESI): 479.1  $[\text{M}+\text{H}]^+$ , calcd. 479.1 for  $\text{C}_{23}\text{H}_{26}\text{O}_{11} + \text{H}^+$

### Compound 60

Compound **60** was prepared according to general procedure for Sonogashira cross coupling described above. Colourless oil, 105 mg, 94% yield.  $R_f$ : 0.5 (hexane/AcOEt 1:1);  $[\alpha]_D^{20} +43.3$  ( $c = 1$ ,  $\text{CHCl}_3$ ).  $^1\text{H}$  NMR (300 MHz,  $\text{CDCl}_3$ ,  $\text{CDCl}_3$ ):  $\delta$  7.39 (2 H, d,  $J = 8.7$  Hz, Har), 7.02 (2 H, d,  $J = 8.7$  Hz, Har), 5.55-5.43 (2 H, m, H-3, H-1), 5.43-5.31 (2 H, m, H-4, H-2), 4.29 (2 H, s,  $\text{OCH}_2$ ), 4.27 (1 H, dd,  $J = 12.3, 6.04$  Hz, H-6), 4.07-4.03 (2 H, m, H-6, H-5), 3.43 (3 H, s,  $\text{OCH}_3$ ), 2.19, 2.05, 2.03, 2.02 (12 H, 4 x s, 4 x OAc);  $^{13}\text{C}$  NMR (75 MHz,  $\text{CDCl}_3$ ,  $\text{CDCl}_3$ ):  $\delta$  170.44, 169.89, 169.86, 169.66, 155.44, 133.21, 117.26, 116.35, 95.85, 85.62, 84.30, 69.24, 69.20, 68.71, 65.81, 62.01, 60.35, 57.62, 20.78, 20.62, 20.59; MS (ESI): 493.0  $[\text{M}+\text{H}]^+$ , calcd. 493.1 for  $\text{C}_{24}\text{H}_{28}\text{O}_{11} + \text{H}^+$

### Compound 61

Compound **61** was prepared according to general procedure of de-*O*-acetylation described above. 58 mg, 91% yield.  $[\alpha]_D^{20} +38.6$  ( $c = 1$ ,  $\text{CH}_3\text{OH}$ ).  $^1\text{H}$  NMR (300 MHz,  $\text{CD}_3\text{OD}$ ):  $\delta$  7.36-7.31 (2 H, m, Har), 7.08-7.04 (2 H, m, Har), 5.49 (1 H, d,  $J = 1.6$  Hz, H-1), 4.36 (2 H, s,  $\text{CCH}_2\text{O}$ ), 3.99-3.81 (1 H, m, H-3), 3.87 (1 H, dd,  $J = 9.3, 3.4$  Hz, H-5), 3.76-3.66 (3 H, m, H-6, H-4, H-2), 3.57-3.53 (1 H, m, H-6);  $^{13}\text{C}$  NMR (75 MHz,  $\text{CD}_3\text{OD}$ ):  $\delta$  - 157.84, 134.00, 118.04, 117.69, 99.97, 87.72, 85.15, 75.47, 72.32, 71.83, 68.23, 62.59, 51.21; HRMS (ESI): 333.09488  $[\text{M}+\text{Na}]^+$ , calcd. 333.09447 for  $\text{C}_{15}\text{H}_{18}\text{O}_7 + \text{Na}^+$

### Compound 62

Compound **62** was prepared according to general procedure of de-*O*-acetylation described above. 49 mg, 93% yield.  $[\alpha]_D^{20} +32.8$  ( $c = 1$ , CH<sub>3</sub>OH). <sup>1</sup>H NMR (300 MHz, CD<sub>3</sub>OD):  $\delta$  7.38-7.33 (2 H, m, Har), 7.10-7.05 (2 H, m, Har), 5.50 (1 H, d,  $J = 1.9$  Hz, H-1), 4.28 (2 H, s, CCH<sub>2</sub>O), 4.0-3.98 (1 H, m, H-3), 3.87 (1 H, dd,  $J = 9.3, 3.2$  Hz, H-5), 3.77-3.63 (3 H, m, H-6, H-4, H-2), 3.57-3.51 (1 H, m, H-6); <sup>13</sup>C NMR (75 MHz, CD<sub>3</sub>OD):  $\delta$  - 157.97, 134.12, 117.71, 117.65, 99.93, 86.91, 84.75, 75.47, 72.30, 71.80, 68.20, 62.55, 61.01, 57.72; HRMS (ESI): 347.11012 [M+H]<sup>+</sup>, calcd. 347.11076 for C<sub>16</sub>H<sub>20</sub>O<sub>7</sub> + Na<sup>+</sup>

Compound **63** was prepared according to a published procedure [2].

### Compound 64

Compound **64** was prepared according to general procedure for sulfamide synthesis described above. Colourless oil, 68 mg, 89% yield. Rf: 0.27 (MeOH: CH<sub>2</sub>Cl<sub>2</sub> 5: 95);  $[\alpha]_D^{20} +48.3$  ( $c = 1$ , CHCl<sub>3</sub>). <sup>1</sup>H NMR (300 MHz, CDCl<sub>3</sub>):  $\delta$  7.91-7.86 (2 H, m, Har), 7.62-7.53 (3 H, m, Har), 4.25-5.19 (3 H, m, H-4, H-3, H-2), 4.71 (1 H, d,  $J = 1.3$  Hz, H-1), 4.24 (1 H, dd,  $J = 12.3, 5.3$  Hz, H-6), 4.06 (1 H, dd,  $J = 12.3, 2.4$  Hz, H-5), 3.95-3.89 (1 H, m, H-6), 3.79-3.72 (1 H, m, OCH<sub>2</sub>CH<sub>2</sub>N), 3.52-3.47 (1 H, m, OCH<sub>2</sub>CH<sub>2</sub>N), 3.32-3.17 (2 H, m, OCH<sub>2</sub>CH<sub>2</sub>N), 2.11, 2.08, 2.06, 2.04 (12 H, 4 x s, 4 x OAc); <sup>13</sup>C NMR (75 MHz, CDCl<sub>3</sub>):  $\delta$  170.62, 169.93, 169.63, 139.96, 132.74, 129.21, 126.93, 69.14, 68.86, 68.73, 67.25, 65.90, 62.35, 42.63, 20.78, 20.68, 20.636; MS (ESI): 554.37 [M+Na]<sup>+</sup>, calcd. 554.13 for C<sub>22</sub>H<sub>29</sub>NO<sub>12</sub>S + Na<sup>+</sup>

### Compound 65

Compound **65** was prepared according to general procedure for sulfamide synthesis described above. Colourless oil, 78 mg, 71% yield. Rf: 0.22 (MeOH: CH<sub>2</sub>Cl<sub>2</sub> 10: 90);  $[\alpha]_D^{20} +16.8$  ( $c = 1$ , CHCl<sub>3</sub>). <sup>1</sup>H NMR (300 MHz, CDCl<sub>3</sub>):  $\delta$  8.41-8.36 (2 H, m, Har), 8.11-8.07 (2 H, m, Har), 5.46-5.44 (1 H, m, NH), 5.29-5.14 (3 H, m, H-4, H-3, H-2), 4.72 (1 H, d,  $J = 1.3$  Hz, H-1), 4.25 (1 H, dd,  $J = 12.3, 5.3$  Hz, H-6), 4.09 (1 H, dd,  $J = 12.3, 2.7$  Hz, H-5), 3.93-3.87 (1 H, m, H-6), 3.83-3.80 (1 H, m, OCH<sub>2</sub>CH<sub>2</sub>N), 3.56-3.50 (1 H, m, OCH<sub>2</sub>CH<sub>2</sub>N), 3.32-3.21 (2 H, m, OCH<sub>2</sub>CH<sub>2</sub>N), 2.15, 2.07, 2.05, 2.0 (12 H, 4 x s, 4 x OAc); <sup>13</sup>C NMR (75 MHz, CDCl<sub>3</sub>):  $\delta$  170.66, 170.15, 170.02, 169.63, 150.131, 145.89, 128.25, 124.55, 97.73, 69.03, 68.85, 68.79, 67.02, 65.93, 62.44, 42.82, 20.78, 20.71, 20.64; MS (ESI): 599.3 [M+Na]<sup>+</sup>, calcd. 599.1 for C<sub>22</sub>H<sub>28</sub>N<sub>2</sub>O<sub>14</sub>S + Na<sup>+</sup>

### Compound 66

Compound **66** was prepared according to general procedure for sulfamide synthesis described above. Colourless oil, 48 mg, 69% yield. Rf: 0.27 (MeOH: CH<sub>2</sub>Cl<sub>2</sub> 5: 95); [ $\alpha$ ]<sub>D</sub><sup>20</sup> +29.4 (*c* = 1, CHCl<sub>3</sub>). <sup>1</sup>H NMR (300 MHz, CDCl<sub>3</sub>):  $\delta$  7.75 (2 H, d, *J* = 8.1 Hz, Har), 7.31 (2 H, d, *J* = 8.1 Hz, Har), 5.25-5.20 (3 H, m, H-4, H-3, H-2), 5.13-5.09 (1 H, m, NH), 4.71 (1 H, d, *J* = 1.3 Hz, H-1), 4.25 (1 H, dd, *J* = 12.1, 5.2 Hz, H-6), 4.09 (1 H, dd, *J* = 12.1, 2.3 Hz, H-5), 3.95-3.91 (1 H, m, H-6), 3.78-3.71 (1 H, m, OCH<sub>2</sub>CH<sub>2</sub>N), 3.52-3.45 (1 H, m, OCH<sub>2</sub>CH<sub>2</sub>N), 3.20-3.16 (2 H, m, OCH<sub>2</sub>CH<sub>2</sub>N), 2.42 (3 H, s, CH<sub>3</sub>), 2.12, 2.11, 2.09, 2.07 (12 H, 4 x s, 4 x OAc); <sup>13</sup>C NMR (75 MHz, CDCl<sub>3</sub>):  $\delta$  170.64, 169.92, 169.65, 143.57, 136.91, 129.81, 126.99, 97.78, 69.13, 68.85, 68.70, 67.28, 65.88, 62.33, 42.61, 29.63, 21.48, 20.80, 20.69, 20.65, 20.63; MS (ESI): 568.35 [M+Na]<sup>+</sup>, calcd. 568.14 for C<sub>23</sub>H<sub>31</sub>NO<sub>12</sub>S + Na<sup>+</sup>

### Compound 67

Compound **67** was prepared according to general procedure for sulfamide synthesis described above. Colourless oil, 68.6 mg, 91% yield. Rf: 0.20 (MeOH: CH<sub>2</sub>Cl<sub>2</sub> 5: 95); [ $\alpha$ ]<sub>D</sub><sup>20</sup> +16.3 (*c* = 1, CHCl<sub>3</sub>). <sup>1</sup>H NMR (300 MHz, CDCl<sub>3</sub>):  $\delta$  7.81-7.77 (2 H, m, Har), 7.55-7.52 (2 H, m, Har), 5.26-5.20 (3 H, m, H-4, H-3, H-2), 5.13-5.11 (1 H, m, NH), 4.73 (1 H, d, *J* = 1.3 Hz, H-1), 4.25 (1 H, dd, *J* = 12.2, 5.3 Hz, H-6), 4.07 (1 H, dd, *J* = 12.2, 2.3 Hz, H-5), 3.98-3.94 (1 H, m, H-6), 3.80-3.74 (1 H, m, OCH<sub>2</sub>CH<sub>2</sub>N), 3.54-3.47 (1 H, m, OCH<sub>2</sub>CH<sub>2</sub>N), 3.21-3.15 (2 H, m, OCH<sub>2</sub>CH<sub>2</sub>N), 2.14, 2.09, 2.05, 2.02 (12 H, 4 x s, 4 x OAc), 1.32 (9 H, s, C(CH<sub>3</sub>)<sub>3</sub>); <sup>13</sup>C NMR (75 MHz, CDCl<sub>3</sub>):  $\delta$  170.63, 169.93, 169.65, 156.54, 136.75, 126.82, 126.19, 69.16, 68.88, 68.73, 67.38, 65.91, 62.35, 42.61, 35.10, 31.01, 20.79, 20.68, 20.64; MS (ESI): 610.35 [M+Na]<sup>+</sup>, calcd. 610.19 for C<sub>26</sub>H<sub>37</sub>NO<sub>12</sub>S + Na<sup>+</sup>

### Compound 68

Compound **68** was prepared according to general procedure for sulfamide synthesis described above. Colourless oil, 61.4 mg, 73% yield. Rf: 0.22 (MeOH: CH<sub>2</sub>Cl<sub>2</sub> 5: 95); [ $\alpha$ ]<sub>D</sub><sup>20</sup> +22.7 (*c* = 1, CHCl<sub>3</sub>). <sup>1</sup>H NMR (300 MHz, CDCl<sub>3</sub>):  $\delta$  7.17 (2 H, s, Har), 5.29-5.21 (3 H, m, H-4, H-3, H-2), 4.89-4.85 (1 H, m, NH), 4.78 (1 H, d, *J* = 1.1 Hz, H-1), 4.25 (1 H, dd, *J* = 12.3, 5.4 Hz, H-6), 4.18-4.06 (3 H, m, H-6, 2 CH(CH<sub>3</sub>)<sub>2</sub>), 3.99-3.94 (1 H, m, H-6), 3.89-3.82 (1 H, m, OCH<sub>2</sub>CH<sub>2</sub>N), 3.58-3.52 (1 H, m, OCH<sub>2</sub>CH<sub>2</sub>N), 3.25-3.13 (2 H, m, OCH<sub>2</sub>CH<sub>2</sub>N), 2.94-2.85 (1 H, m, CH(CH<sub>3</sub>)<sub>2</sub>), 2.14, 2.09, 2.05, 2.02 (12 H, 4 x s, 4 x OAc), 1.28-1.24 (18 H, s, 3 CH(CH<sub>3</sub>)<sub>2</sub>); <sup>13</sup>C NMR (75 MHz, CDCl<sub>3</sub>):  $\delta$  170.60, 169.90, 169.75, 169.62, 152.88, 150.17, 131.91, 123.84, 97.85, 69.09, 68.82, 68.77, 67.34, 65.88, 62.31, 42.33, 34.08, 29.64,

29.57, 24.78, 23.51, 20.78, 20.66, 20.64, 20.59; MS (ESI): 680.44  $[M+Na]^+$ , calcd. 680.27 for  $C_{31}H_{47}NO_{12}S + Na^+$

### Compound 69

Compound **69** was prepared according to general procedure for sulfamide synthesis described above. Colourless oil, 50 mg, 62% yield. Rf: 0.19 (MeOH:  $CH_2Cl_2$  5: 95);  $[\alpha]_D^{20} +28.7$  ( $c = 1$ ,  $CHCl_3$ ).  $^1H$  NMR (300 MHz,  $CDCl_3$ ):  $\delta$  8.64 (1 H, d,  $J = 8.4$  Hz, Har), 8.26 (1 H, dd,  $J = 7.4, 1.1$  Hz, Har), 8.07 (1 H, d,  $J = 8.2$  Hz, Har), 7.94 (1 H, d,  $J = 8.4$  Hz, Har), 7.71-7.66 (1 H, m, Har), 7.60-7.52 (2 H, m, Har), 5.45-5.43 (1 H, m, NH), 5.21-5.11 (3 H, m, H-4, H-3, H-2), 4.59 (1 H, bs, H-1), 4.11 (1 H, dd,  $J = 12.3, 5.3$  Hz, H-6), 3.98 (1 H, dd,  $J = 12.3, 2.2$  Hz, H-5), 3.84-3.79 (1 H, m, H-6), 3.61-3.54 (1 H, m,  $OCH_2CH_2N$ ), 3.29-3.23 (1 H, m,  $OCH_2CH_2N$ ), 3.20-3.14 (2 H, m,  $OCH_2CH_2N$ ), 2.13, 2.10, 2.05, 1.99 (12 H, 4 x s, 4 x OAc);  $^{13}C$  NMR (75 MHz,  $CDCl_3$ ):  $\delta$  170.59, 169.86, 169.80, 169.60, 134.72, 134.35, 134.17, 129.47, 129.07, 128.52, 127.93, 126.89, 124.159, 97.77, 69.01, 68.82, 68.62, 67.17, 65.78, 62.24, 42.65, 20.77, 20.64, 20.61; MS (ESI): 604.3  $[M+Na]^+$ , calcd. 604.1 for  $C_{26}H_{31}NO_{12}S + Na^+$

### Compound 70

Compound **70** was prepared according to general procedure of de-*O*-acetylation described above. 42 mg, 88% yield.  $[\alpha]_D^{20} +18.2$  ( $c = 1$ ,  $CH_3OH$ ).  $^1H$  NMR (300 MHz,  $CD_3OD$ ):  $\delta$  7.76-7.72 (2H, m, Har), 7.51-7.44 (3H, m, Har), 4.52 (1H, d,  $J = 1.7$  Hz, H-1), 3.73-3.27 (7H, m, H-2,3,4,6<sub>a</sub>,6<sub>b</sub> and  $OCH_2$ ), 2.98-2.93 (3H, m,  $CH_2NH-S$ );  $^{13}C$  NMR (75 MHz,  $CD_3OD$ ):  $\delta$  133.6, 130.3, 130.2, 127.9, 101.8, 74.7, 72.4, 71.9, 68.5, 67.4, 62.8, 43.9; MS (ESI): 386.30  $[M+Na]^+$ , calcd. 386.37 for  $C_{14}H_{21}NO_8S + Na^+$

### Compound 71

Compound **71** was prepared according to general procedure of de-*O*-acetylation described above. 42 mg, 96% yield.  $[\alpha]_D^{20} +17.1$  ( $c = 1$ ,  $CH_3OH$ ).  $^1H$  NMR (300 MHz,  $CD_3OD$ ):  $\delta$  8.37 (2 H, d,  $J = 8.5$  Hz, Har), 8.04 (2 H, d,  $J = 8.5$  Hz, Har), 4.60 (1 H, bs, H-1), 3.76-3.58 (3 H, m, H-6, H-5, H-2), 3.52-3.28 (3 H, m, H-6, H-4, H-3);  $^{13}C$  NMR (75 MHz,  $CD_3OD$ ):  $\delta$  151.43, 148.71, 129.32, 125.45, 101.76, 74.74, 72.452, 71.88, 68.50, 67.43, 62.82, 43.98; MS (ESI): 431.30  $[M+Na]^+$ , calcd. 431.37 for  $C_{14}H_{20}N_2O_{10}S + Na^+$

### Compound 72

Compound **72** was prepared according to general procedure of de-*O*-acetylation described above. 24.5 mg, 98% yield.  $[\alpha]_D^{20} +23.6$  ( $c = 1$ ,  $CH_3OH$ ).  $^1H$  NMR (300 MHz,  $CD_3OD$ ):  $\delta$  7.73 (2 H, d,  $J = 8.1$  Hz,

Har), 7.37 (2 H, d,  $J = 8.1$  Hz, Har), 4.63 (1 H, d,  $J = 1.3$  Hz, H-1), 3.80-3.73 (2 H, m, H-3, H-2), 3.71-3.54 (4 H, m, H-6, H-5, H-4,  $\text{OCH}_2\text{CH}_2\text{N}$ ), 3.47-3.38 (2 H, m, H-6,  $\text{OCH}_2\text{CH}_2\text{N}$ ), 3.08-3.03 (2 H, m,  $\text{OCH}_2\text{CH}_2\text{N}$ ), 2.42 (3 H, s,  $\text{CH}_3$ );  $^{13}\text{C}$  NMR (75 MHz,  $\text{CD}_3\text{OD}$ ):  $\delta$  144.67, 139.10, 130.74, 128.00, 101.75, 74.64, 72.45, 71.89, 68.50, 67.38, 62.78, 43.83, 21.45; MS (ESI): 400.40  $[\text{M}+\text{Na}]^+$ , calcd. 400.40 for  $\text{C}_{15}\text{H}_{23}\text{NO}_8\text{S} + \text{Na}^+$

### Compound 73

Compound **73** was prepared according to general procedure of de-*O*-acetylation described above. 24.3 mg, 97% yield.  $[\alpha]_D^{20} +19.8$  ( $c = 1$ ,  $\text{CH}_3\text{OH}$ ).  $^1\text{H}$  NMR (300 MHz,  $\text{CD}_3\text{OD}$ ):  $\delta$  7.77 (2 H, d,  $J = 8.5$  Hz, Har), 7.60 (2 H, d,  $J = 8.5$  Hz, Har), 4.64 (1 H, d,  $J = 1.3$  Hz, H-1), 3.81-3.71 (2 H, m, H-3, H-2), 3.69-3.51 (4 H, m, H-6, H-5, H-4,  $\text{OCH}_2\text{CH}_2\text{N}$ ), 3.48-3.39 (2 H, m, H-6,  $\text{OCH}_2\text{CH}_2\text{N}$ ), 3.11-3.03 (2 H, m,  $\text{OCH}_2\text{CH}_2\text{N}$ ), 1.35 (9 H, s,  $\text{C}(\text{CH}_3)_3$ );  $^{13}\text{C}$  NMR (75 MHz,  $\text{CD}_3\text{OD}$ ):  $\delta$  157.52, 139.03, 127.86, 127.22, 101.77, 74.67, 72.47, 71.92, 68.51, 67.48, 62.80, 43.85, 36.00, 31.48; MS (ESI): 442.40  $[\text{M}+\text{Na}]^+$ , calcd. 442.48 for  $\text{C}_{18}\text{H}_{29}\text{NO}_8\text{S} + \text{Na}^+$

### Compound 74

Compound **74** was prepared according to general procedure of de-*O*-acetylation described above. 41.4 mg, 94% yield.  $[\alpha]_D^{20} +20.6$  ( $c = 1$ ,  $\text{CH}_3\text{OH}$ ).  $^1\text{H}$  NMR (300 MHz,  $\text{D}_2\text{O}$ ):  $\delta$  7.11 (2H, s, Har), 4.56 (1H, d,  $J = 1.7$  Hz, H-1), 4.07 (3H, m, CH), 3.71-2.78 (10H, m, H-2, 3, 4, 5, 6a, 6b,  $\text{OCH}_2$ ,  $\text{CH}_2\text{N}$ ), 1.13 ppm (18H, d,  $J = 6.9$  Hz,  $\text{CH}_3$ );  $^{13}\text{C}$  NMR (75 MHz,  $\text{CD}_3\text{OD}$ ):  $\delta$  151.7, 134.6, 124.9, 101.6, 74.7, 71.9, 68.5, 67.4, 62.8, 35.4, 30.6, 25.2, 24.0; MS (ESI): 512.40  $[\text{M}+\text{Na}]^+$ , calcd. 512.23 for  $\text{C}_{23}\text{H}_{39}\text{NO}_8\text{S} + \text{Na}^+$

### Compound 75

Compound **75** was prepared according to general procedure of de-*O*-acetylation described above. 30 mg, 96% yield.  $[\alpha]_D^{20} +23.5$  ( $c = 1$ ,  $\text{CH}_3\text{OH}$ ).  $^1\text{H}$  NMR (300 MHz,  $\text{CD}_3\text{OD}$ ):  $\delta$  9.62-8.60, 8.15-8.13, 8.09-8.07, 7.95-7.94, 7.62-7.52 (7H, m, Har), 5.27 (1H, sl, NH), 4.36, (1H, d,  $J = 1.0$  Hz, H-1), 3.47-3.00 ppm (10 H, m, H-2, 3, 4, 5, 6a, 6b,  $\text{OCH}_2$  and  $\text{CH}_2\text{N}$ );  $^{13}\text{C}$  NMR (75 MHz,  $\text{CD}_3\text{OD}$ ):  $\delta$ ; 135.2, 130.1, 130.0, 129.0, 128.0, 125.9, 125.3, 101.0, 74.6, 72.4, 71.8, 8.5, 67.3, 62.8, 43.7; MS (ESI): 436.10  $[\text{M}+\text{Na}]^+$ , calcd. 436.10 for  $\text{C}_{18}\text{H}_{23}\text{NO}_8\text{S} + \text{Na}^+$

## Compound 76

Compound **76** was prepared as described in the literature: A. Giannis, K. Sandhoff, K. *Tetrahedron Lett.* **1985**, 26, 1479-1482. ESI<sup>+</sup>-HRMS: [M+NH<sub>4</sub>]<sup>+</sup> calcd for C<sub>37</sub>H<sub>44</sub>NO<sub>5</sub>, 582.3214; found, 582.3226.

## Compound 77 : full structural characterization

To a solution of allyl-2,3,4,6-tetra-*O*-benzyl- $\alpha$ -mannopyranoside **76** (500 mg, 0.88 mmol) in THF (200 mL) cooled to -78°C was added lithium (10 eq, 62 mg) and NH<sub>3</sub> (100 mL) was condensed until the solution had a persistent blue color (5 h). The reaction mixture was stirred for 3 h and then quenched with ethanol. The mixture was allowed to warm to room temperature and was stirred overnight to allow the complete ammonia evaporation. The remaining solution was concentrated and then the crude product was dissolved in acetic anhydride (10 mL) and pyridine (15 mL) and catalytic DMAP was added. The mixture was stirred overnight and the crude product was extracted with CH<sub>2</sub>Cl<sub>2</sub> (3 x 20 mL). The crude product was then purified by flash column chromatography using 0-13% AcOEt: hexanes as the eluant, resulting in **77** (310 mg, 94%) as a white solid. Rf: 0.22 (AcOEt/Hexanes 3:7) <sup>1</sup>H NMR (600 MHz, CDCl<sub>3</sub>):  $\delta$  5.77 (1 H, J = 17.4, 10.2, 6.8 Hz, CH=CH<sub>2</sub>), 5.26 (1 H, dd, J<sub>2,3</sub> = 3.3, J<sub>3,4</sub> = 8.8 Hz, H-3), 5.20 (1H, dd, J<sub>1,2</sub> = 3.3 Hz, H-2), 5.19 (1 H, dd, J<sub>3,4</sub> = J<sub>4,5</sub> = 8.8 Hz, H-4), 5.18-5.12 (2H, m, CH=CH<sub>2</sub>), 4.32 (1 H, dd, J = 12.1, 6.4 Hz, H-6a), 4.11 (1 H, dd, J = 12.1, 2.9 Hz, H-6b), 4.04 (1 H, ddd, J<sub>1,2</sub> = 3.3 Hz, J<sub>1,CH2A</sub> = 15.2 Hz, J<sub>1,CH2B</sub> = 7.0 Hz, H-1), 3.93-3.86 (1 H, m, H-5), 2.52 (1 H, ddd, J<sub>1,CHA</sub> = 15.2 Hz, J<sub>CHA,CHB</sub> = 14.7 Hz, J<sub>CHA,CH</sub> = 6.4 Hz, CH<sub>2</sub>CH), 2.41 (1 H, ddd, J<sub>1,CHB</sub> = 7.0 Hz, J<sub>CHA,CHB</sub> = 14.7 Hz, J<sub>CHB,CH</sub> = 6.0 Hz, CH<sub>2</sub>CH), 2.12, 2.08, 2.06, 2.02 (12 H, 4 s, OAc); <sup>13</sup>C NMR (125 MHz, CDCl<sub>3</sub>):  $\delta$  170.9, 170.4, 170.1, 169.8 (C(O)), 132.7 (CH<sub>2</sub>CHC=CH<sub>2</sub>), 118.5 (CH<sub>2</sub>CHC=CH<sub>2</sub>), 74.3 (C-1), 70.8 (C-5), 70.2 (C-4), 70.0 (C-3), 67.2 (C-2), 62.6 (C-6), 33.8, 21.1, 21.0, 20.9 (OAc); MS (ESI): 373.14 [M+H]<sup>+</sup>, calcd. 373.13 for C<sub>17</sub>H<sub>24</sub>O<sub>9</sub> + H<sup>+</sup>

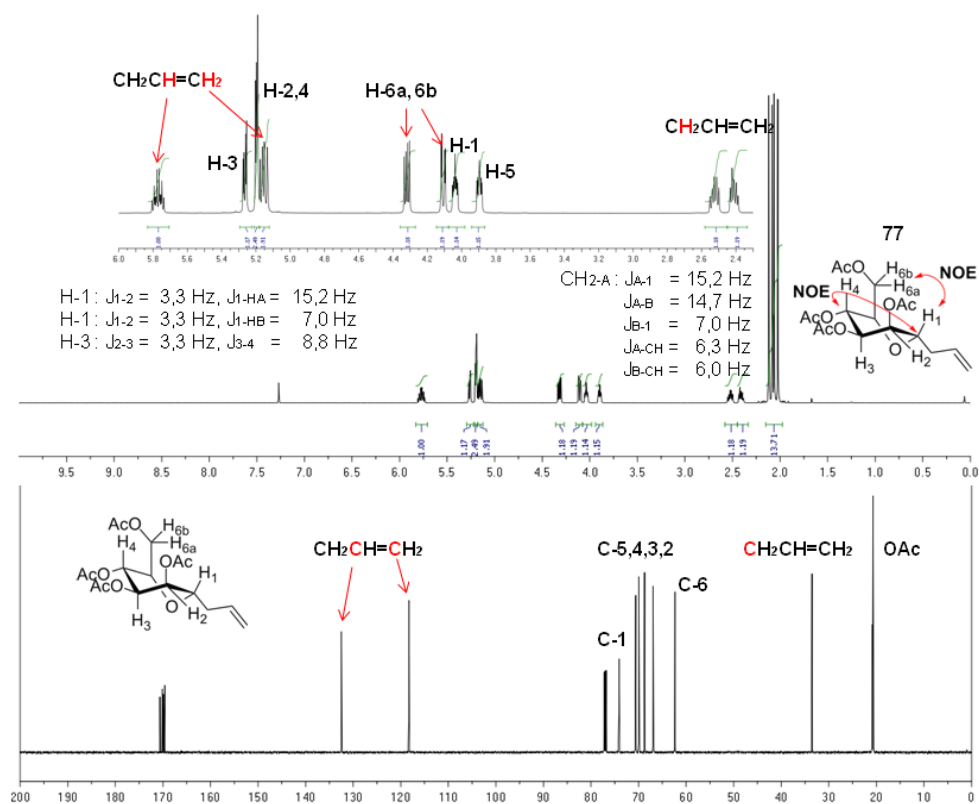

**Figure S1.** 600 MHz  $^1\text{H}$ - and  $^{13}\text{C}$ -NMR (CDCl<sub>3</sub>) of 77.

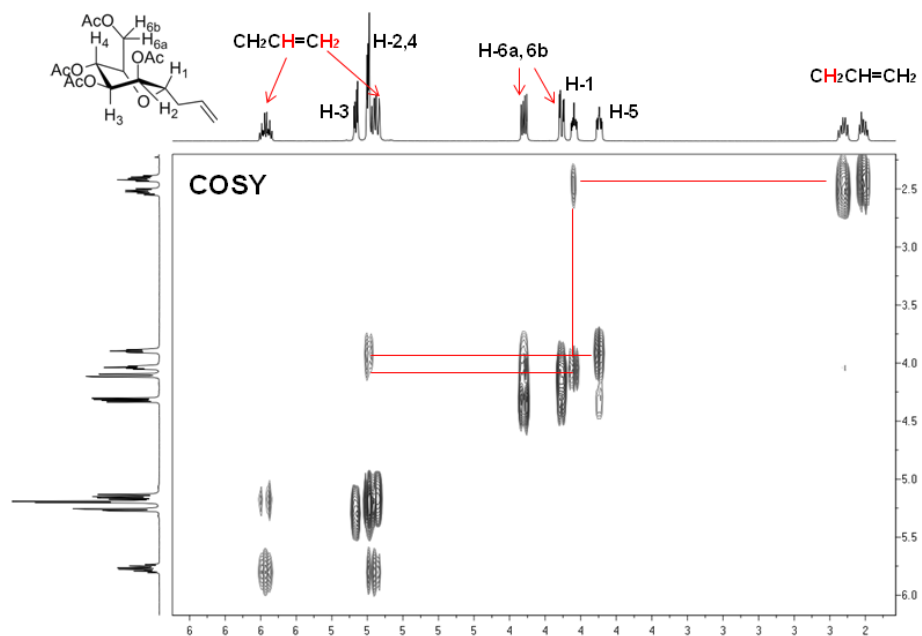

**Figure S2.** 600 MHz COSY  $^1\text{H}$ -NMR (CDCl<sub>3</sub>) of 77 illustrating the protons correlation.



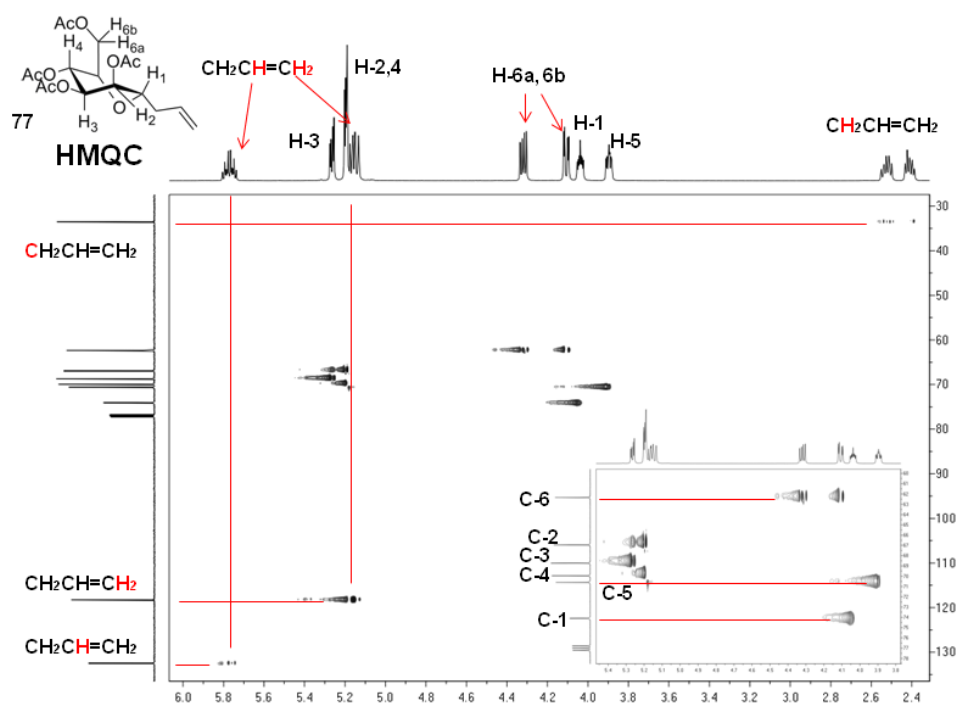

**Figure S3.** 600 MHz HMQC-NMR ( $\text{CDCl}_3$ ) of **77** illustrating the proton-carbon correlation used for the total signal assignments.

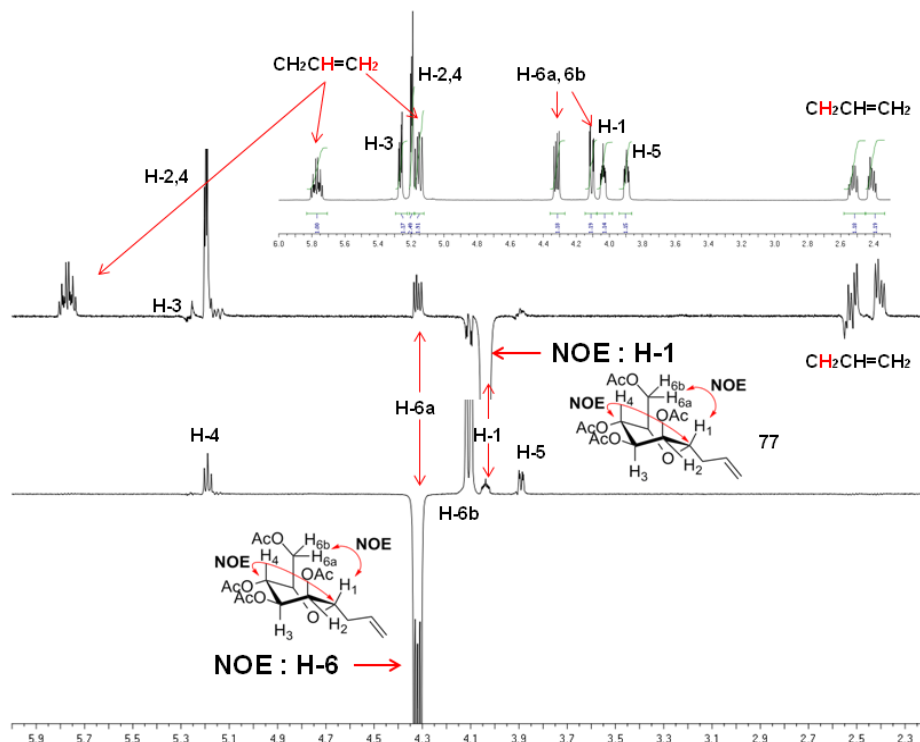

**Figure S4.** 600 MHz 1D-NOE NMR ( $\text{CDCl}_3$ ) of **77** clearly illustrating the connectivity between H1-H6a-H4, thus illustrating that it is in a skewed-boat conformation.

## Compound 78

Compound **78** was prepared according to general procedure of de-*O*-acetylation described above. 22 mg, 92% yield.  $[\alpha]_D^{20} +38.2$  ( $c = 1$ , CH<sub>3</sub>OH). <sup>1</sup>H NMR (300 MHz, D<sub>2</sub>O):  $\delta$  5.75-5.61 (1H, m, CH=CH<sub>2</sub>), 5.01 (2 H, m, CH=CH<sub>2</sub>), 3.86-3.81 (1 H, m, H-6), 3.76-3.74 (1 H, m, H-5), 3.71-3.64 (2 H, m, H-6, H-1), 3.59-3.39 (3 H, m, H-4, H-3, H-2), 2.44-2.33 (1 H, m, CH<sub>2</sub>CH=CH), 2.24-2.16 (1 H, m, CH<sub>2</sub>CH=CH); <sup>13</sup>C NMR (75 MHz, D<sub>2</sub>O):  $\delta$  133.69, 117.24, 77.15, 73.28, 70.26, 70.14, 66.80, 60.69, 32.11. <sup>1</sup>H NMR (900 MHz, DMSO-*d*<sub>6</sub>):  $\delta$  5.82 (1H,  $J_{b,c} = 17.2$ ,  $J_{b,c'} = 10.2$ ,  $J_{a,b} = 6.7$  Hz, CH=CH<sub>2</sub>), 5.08 (1H, dd,  $J_{b,c} = 17.2$ ,  $J_{c,c'} = 1.9$  Hz, CH=CH<sub>2</sub>), 5.01 (1H, dd,  $J_{b,c'} = 10.2$ ,  $J_{c,c'} = 1.9$  Hz, CH=CH<sub>2</sub>), 4.69 (1H, d,  $J = 5.2$  Hz, OH-4), 4.59 (1H, d,  $J = 4.8$  Hz, OH-3), 4.42 (1H, d,  $J = 4.6$  Hz, OH-2), 4.33 (1H, t,  $J = 5.9$  Hz, OH-6), 3.68 (1H, ddd,  $J = 7.8, 6.1, 3.4$  Hz, H-1), 3.58 (1H, ddd,  $J_{6a,6b} = 11.4$  Hz,  $J_{5,6a} = 3.3$  Hz,  $J_{6,OH} = 5.9$  Hz, H-6a), 3.52 (2H, m, H-2 and H-3), 3.48 (1H, ddd,  $J_{6a,6b} = 11.4$  Hz,  $J_{5,6b} = 5.9$  Hz,  $J_{6,OH} = 5.9$  Hz, H-6b), 3.42 (1H, td,  $J_{3,4} = J_{4,5} = 7.3$  Hz,  $J_{4,OH} = 5.2$  Hz, H-4), 3.30 (1H, ddd,  $J_{4,5} = 7.3$  Hz,  $J_{5,6b} = 5.9$  Hz,  $J_{5,6a} = 3.3$  Hz, H-5), 2.27 (2 H, td,  $J = 7.1, 6.7, 1.9$  Hz, CH<sub>2</sub>CH=CH); <sup>13</sup>C NMR (150 MHz, DMSO-*d*<sub>6</sub>):  $\delta$  136.1 (CH=CH<sub>2</sub>), 116.9 (CH=CH<sub>2</sub>), 76.4 (C-5), 75.3 (C-1), 71.4, 70.1 (C-2 and C-3), 68.6 (C-4), 61.6 (C-6) and 34.4 ppm (CH<sub>2</sub>CH=CH). HRMS (ESI): 205.0997 [M+H]<sup>+</sup>, calcd. 205.1070 for C<sub>9</sub>H<sub>16</sub>O<sub>5</sub> + H<sup>+</sup>

## Full conformational analysis of 78

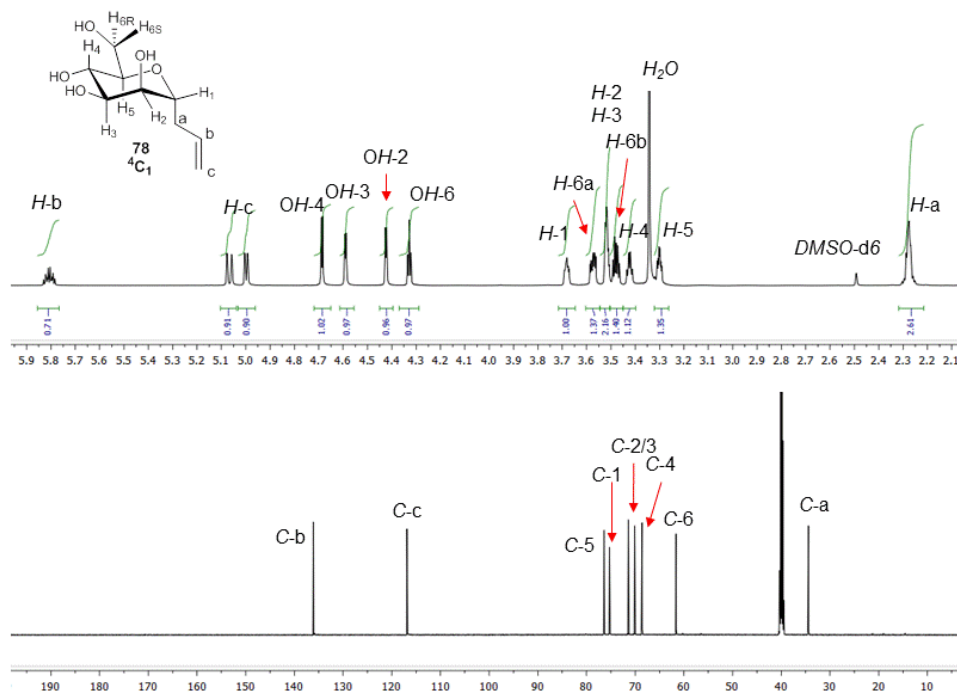

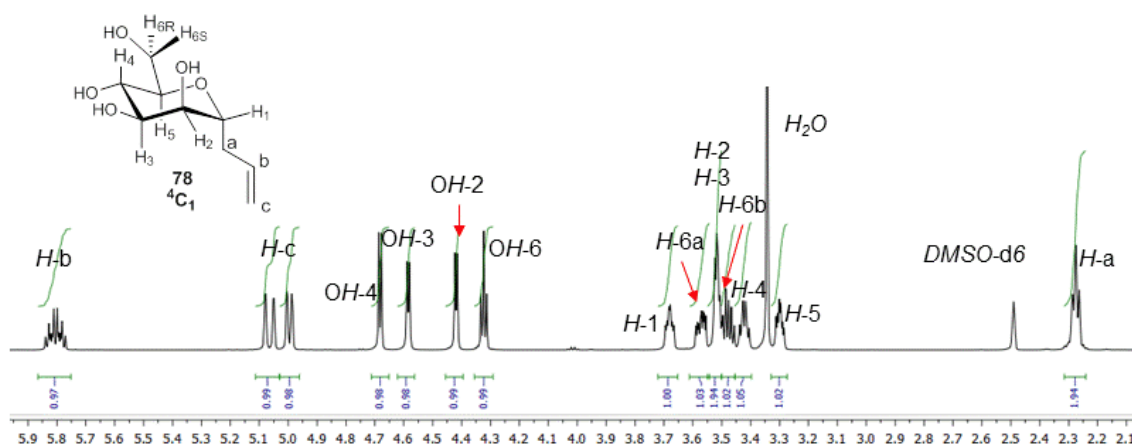

**Figure S5.** 900 (Top) and 600 (Bottom) MHz <sup>1</sup>H and <sup>13</sup>C-NMR in DMSO-d<sub>6</sub> of **78**.

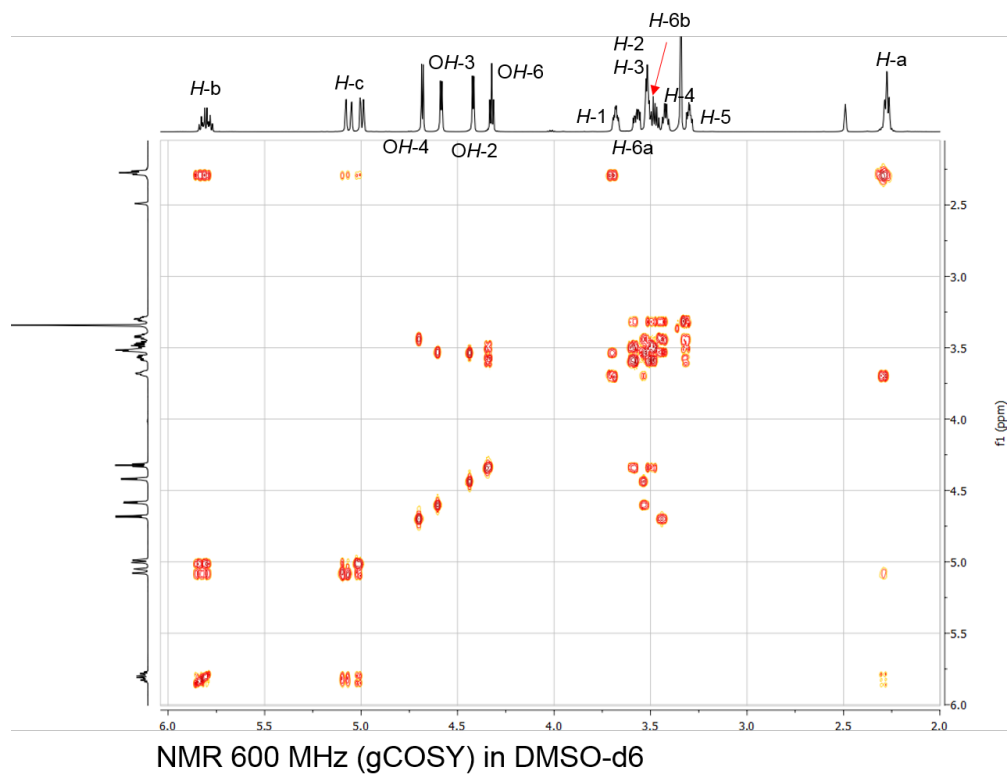

**Figure S6.** Cpd **78**.

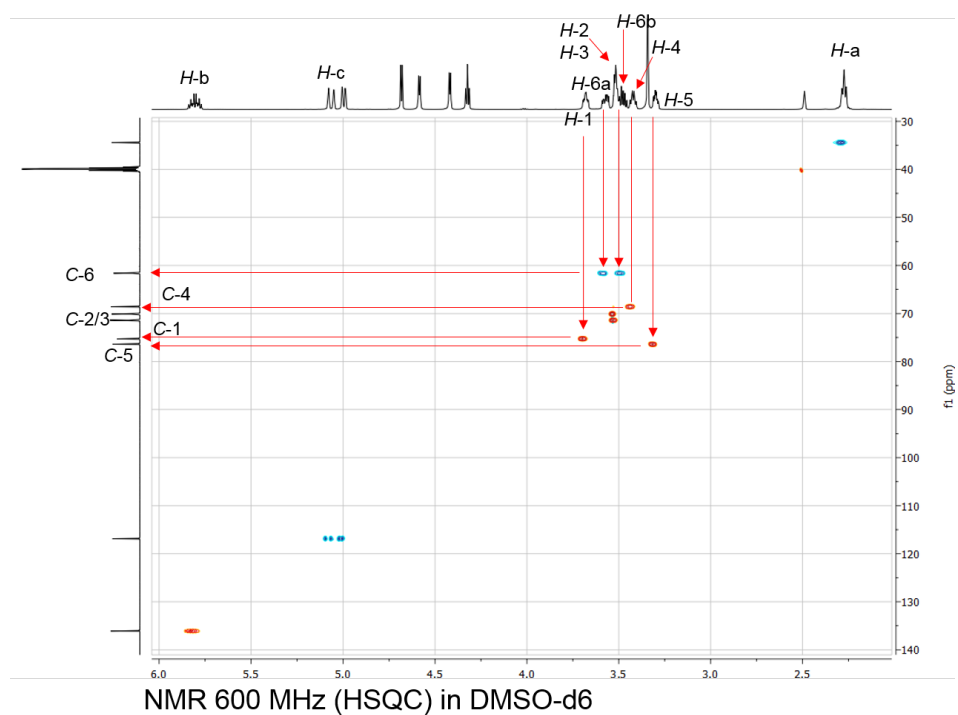

Figure S7. Cpd 78

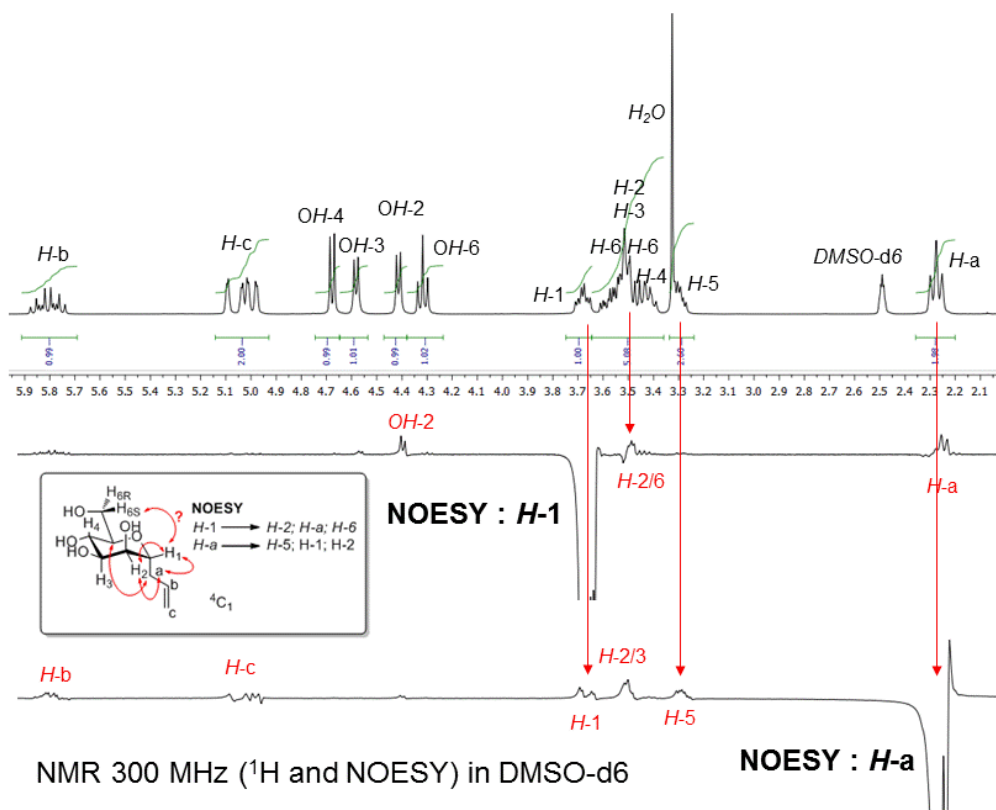

Figure S8.

**Compound 79** was prepared according to a published procedure [2].

### Compound 80

A solution of allyl 2,3,4,6-tetra-*O*-acetyl- $\alpha$ -mannopyranoside **77** (2.7 g, 7.3 mmol) was dissolved in anhydrous DCM (100 mL) and cooled to  $-78^{\circ}\text{C}$ . Ozone was bubbled through the solution until a persistent blue color. The mixture was then deoxygenated by bubbling nitrogen until it was clear. Acetic acid (6.5 mL) and zinc dust (6.5 g) was added to the solution and the mixture was allowed to warm to room temperature overnight. The reaction mixture was filtered through celite and the washing were concentrated to dryness. The crude aldehyde was used for the next step without purification. To a solution of a crude 2,3,4,6-tetra-*O*-acetyl- $\alpha$ -mannopyranosyl aldehyde (1.3 g, 3.5 mmol) in *t*-BuOH (20 mL) and a solution of  $\text{KH}_2\text{PO}_4$  (1 M, 7 mL) were added to a vigorously stirred solution of  $\text{KMnO}_4$  (1 M, 7 mL). The reaction mixture was stirred for 30 minutes. A solution of saturated  $\text{Na}_2\text{SO}_3$  was added until the  $\text{KMnO}_4$  was neutralized, giving a brown precipitate of  $\text{MnO}_2$  which was filtered and washed with EtOH (2 x 20 mL). The EtOH was removed and the remaining solution acidified to pH 3 using 1 N HCl. The acidic solution was then extracted with DCM (3 x 50 mL). The combined extracts were concentrated to dryness resulting in a white foam **80** (1.28 g, 94 %); Rf: 0.41 (Methanol: dichloromethane 1: 9).  $[\alpha]_D^{20} +17.8$  ( $c = 1$ ,  $\text{CHCl}_3$ ).  $^1\text{H}$  NMR (300 MHz,  $\text{CDCl}_3$ ):  $\delta$  5.25-5.21 (1 H, m, H-3), 5.15-5.09 (2 H, m, H-4, H-2), 5.07-4.39 (2 H, m, H-6, H-1), 4.13 (1 H, dd,  $J = 12.1, 3.8$  Hz, H-6), 4.01-3.95 (1 H, m, H-5), 2.74 (1 H, dd,  $J = 15.9, 9.6$  Hz,  $\text{CH}_2\text{CO}$ ), 2.66 (1 H, dd,  $J = 15.9, 2.7$  Hz,  $\text{CH}_2\text{CO}$ );  $^{13}\text{C}$  NMR (75 MHz,  $\text{CDCl}_3$ ):  $\delta$  174.19, 170.65, 169.80, 169.61, 169.52, 72.05, 69.32, 69.22, 68.03, 67.41, 61.49, 35.38, 20.63, 20.55. ESI<sup>+</sup>-HRMS:  $[\text{M}+\text{H}]^+$  calcd for  $\text{C}_{16}\text{H}_{23}\text{O}_{11}$ , 391.1235; found, 391.1243.

### Compound 81

Compound **81** was prepared according to general procedure described above. Colourless oil, 133.76 mg, 88% yield. Rf: 0.12 (Methanol: dichloromethane 0.5: 9.5);  $[\alpha]_D^{20} +2.87$  ( $c = 1$ ,  $\text{CHCl}_3$ ).  $^1\text{H}$  NMR (300 MHz,  $\text{CDCl}_3$ ):  $\delta$  8.96 (1 H, m, NH), 7.52-7.46 (2 H, m, Har), 7.33-7.28 (15 H, m, Har), 7.23-7.19 (8 H, m, Har), 4.56-4.44 (8 H, m, 4  $\text{OCH}_2\text{Ph}$ ), 4.39-4.32 (1 H, m, H-1), 4.22-4.17 (1 H, m, H-5), 4.04-3.98 (1 H, m, H-6), 3.80-3.77 (1 H, m, H-3), 3.64 (1 H, dd,  $J = 8.2, 3.0$  Hz, H-2), 3.59-3.57 (1 H, m, H-4), 3.45 (1 H, dd,  $J = 3.5, 10.4$  Hz, H-6), 2.82-2.65 (2 H, m,  $\text{CHCH}_2$ );  $^{13}\text{C}$  NMR (75 MHz,  $\text{CDCl}_3$ ):  $\delta$  168.95, 128.22, 137.70, 137.56, 137.50, 128.63, 128.45, 128.40, 128.37, 128.11, 127.83, 127.73, 123.69, 120.15, 75.41, 74.83, 74.72, 73.62, 73.22, 72.87, 72.51, 71.83, 67.34, 67.11, 38.54; MS (ESI): 658.41  $[\text{M}+\text{H}]^+$ , calcd. 658.32 for  $\text{C}_{42}\text{H}_{43}\text{NO}_6 + \text{H}^+$

## Compound 82

Compound **82** was prepared according to general procedure described above. Colourless oil, 130 mg, 75% yield. Rf: 0.22 (Methanol: dichloromethane 0.5: 9.5);  $[\alpha]_D^{20} +9.4$  ( $c = 1$ ,  $\text{CHCl}_3$ ).  $^1\text{H}$  NMR (300 MHz,  $\text{CDCl}_3$ ):  $\delta$  7.39-7.14 (25 H, m, Har), 4.57-4.47 (8 H, m, 4  $\text{OCH}_2\text{Ph}$ ), 4.38-4.34 (1 H, m, H-1), 4.31 (2 H, s,  $\text{NHCH}_2\text{Ph}$ ), 4.02-3.85 (1 H, m, H-5), 3.88 (1 H, t,  $J = 9.1$  Hz, H-6), 3.75 (1 H, dd,  $J = 5.1, 3.0$  Hz, H-3), 3.61-3.55 (2 H, m, H-4, H-2), 3.43 (1 H, dd,  $J = 10.5, 3.4$  Hz, H-6), 2.66 (1 H, dd,  $J = 15.9, 2.7$  Hz,  $\text{CH}_2\text{CO}$ ), 2.66 (1 H, dd,  $J = 15.9, 9.6$  Hz,  $\text{CH}_2\text{CO}$ );  $^{13}\text{C}$  NMR (75 MHz,  $\text{CDCl}_3$ ):  $\delta$  170.56, 138.66, 137.74, 137.69, 137.65, 128.43, 128.39, 128.33, 128.07, 127.86, 127.82, 127.77, 127.68, 127.41, 126.91, 74.55, 74.26, 74.19, 73.01, 72.67, 71.77, 67.54, 43.03, 37.39; MS (ESI): 694.49  $[\text{M}+\text{Na}]^+$ , calcd. 694.31 for  $\text{C}_{43}\text{H}_{45}\text{NO}_6 + \text{Na}^+$

## Compound 83

Compound **83** was prepared according to general procedure described above. Colourless oil, 108 mg, 91% yield. Rf: 0.28 (Methanol: dichloromethane 0.5: 9.5);  $[\alpha]_D^{20} +24.0$  ( $c = 1$ ,  $\text{CHCl}_3$ ).  $^1\text{H}$  NMR (300 MHz,  $\text{CDCl}_3$ ):  $\delta$  7.34-7.11 (25 H, m, Har), 7.0 8.96 (1 H, m, NH), 4.54-4.46 (8 H, m, 4  $\text{OCH}_2\text{Ph}$ ), 4.32-4.26 (1 H, m, H-1), 4.08-4.03 (1 H, m, H-5), 3.88 (1 H, t,  $J = 9.5$  Hz, H-6), 3.78-3.57 (1 H, m, H-3), 3.64-3.59 (1 H, m, H-2, H-4), 3.52 (1 H, dd,  $J = 9.8, 3.1$  Hz, H-6), 3.22-3.01 (2 H, m,  $\text{HNCH}_2$ ), 2.68-2.48 (4 H, m,  $\text{CH}_2\text{Ph}$ ,  $\text{CH}_2\text{CO}$ ), 1.68 (2 H, q,  $J = 7.8$  Hz,  $\text{HNCH}_2\text{CH}_2$ );  $^{13}\text{C}$  NMR (75 MHz,  $\text{CDCl}_3$ ):  $\delta$  170.54, 141.69, 137.78, 137.76, 137.67, 128.43, 128.39, 128.29, 128.29, 128.24, 128.05, 127.93, 127.85, 127.82, 127.78, 127.76, 127.70, 125.71, 75.56, 74.69, 74.43, 74.15, 73.18, 72.75, 72.69, 71.79, 67.88, 67.76, 38.93, 37.29, 33.08, 31.11; MS (ESI): 700.31  $[\text{M}+\text{H}]^+$ , calcd. 699.36 for  $\text{C}_{45}\text{H}_{49}\text{NO}_6 + \text{H}^+$

## Compound 84

Compound **84** was prepared according to general procedure described above. Colourless oil, 256 mg, 75% yield. Rf: 0.25 (Methanol: dichloromethane 0.5: 9.5);  $[\alpha]_D^{20} +11.3$  ( $c = 1$ ,  $\text{CHCl}_3$ ).  $^1\text{H}$  NMR (300 MHz,  $\text{CDCl}_3$ ):  $\delta$  8.92 (1 H, brs, NH), 7.41-7.17 (24 H, m, Har), 4.58-4.27 (8 H, m,  $\text{OCH}_2\text{Ph}$ ), 4.36-4.30 (1 H, m, H-1), 4.16-4.13 (1 H, m, H-5), 3.79 (1 H, t,  $J = 9.7$  Hz, H-6), 3.81-3.77 (1 H, m, H-3), 3.63-3.55 (2 H, m, H-4, H-2), 3.42 (1 H, dd,  $J = 9.8, 3.6$  Hz, H-6), 2.73 (1 H, dd,  $J = 15.3, 3.1$  Hz,  $\text{CH}_2\text{CO}$ ), 2.66 (1 H, dd,  $J = 15.3, 9.5$  Hz,  $\text{CH}_2\text{CO}$ );  $^{13}\text{C}$  NMR (75 MHz,  $\text{CDCl}_3$ ):  $\delta$  169.09, 168.20, 137.91, 137.74, 137.70, 134.62, 134.03, 129.63, 128.50, 128.46, 128.43, 128.37, 128.22, 128.13, 128.06, 127.95, 127.91, 127.89, 127.86, 127.79, 127.56, 121.03, 120.43, 77.21, 75.76, 75.24, 75.03, 74.93, 74.04, 73.50, 73.36, 73.06, 72.59, 71.97, 67.64, 67.33, 38.68, 24.71; MS (ESI): 715.51  $[\text{M}+\text{H}]^+$ , calcd. 715.34 for  $\text{C}_{44}\text{H}_{46}\text{N}_2\text{O}_7 + \text{H}^+$

### Compound 85

Compound **85** was prepared according to general procedure described above. Colourless oil, 263 mg, 76% yield. Rf: 0.15 (Methanol: dichloromethane 0.5: 9.5);  $[\alpha]_D^{20} +27.2$  ( $c = 1$ ,  $\text{CHCl}_3$ ).  $^1\text{H}$  NMR (300 MHz,  $\text{CDCl}_3$ ):  $\delta$  8.84 (1 H, m, NH), 7.34-7.19 (22 H, m, Har), 6.63 (2 H, d,  $J = 9.1$  Hz, Har), 4.56-4.38 (8 H, m, 4  $\text{OCH}_2\text{Ph}$ ), 4.39-4.33 (1 H, m, H-1), 4.17-4.14 (1 H, m, H-5), 4.0 (1 H, t,  $J = 9.7$  Hz, H-6), 3.75-3.72 (1 H, m, H-3), 3.65 (1 H, dd,  $J = 7.7, 2.5$  Hz, H-2), 3.59-3.56 (1 H, m, H-4), 3.44 (1 H, dd,  $J = 10.4, 3.3$  Hz, H-6), 2.75 (1 H, dd,  $J = 14.1, 2.5$  Hz,  $\text{CH}_2\text{CO}$ ), 2.68 (1 H, dd,  $J = 14.1, 9.1$  Hz,  $\text{CH}_2\text{CO}$ );  $^{13}\text{C}$  NMR (75 MHz,  $\text{CDCl}_3$ ):  $\delta$  169.13, 152.67, 137.67, 130.94, 128.49, 128.45, 128.40, 128.16, 127.88, 127.79, 122.51, 115.51, 75.64, 75.02, 74.80, 74.09, 73.34, 73.01, 72.62, 71.98, 67.65, 67.42, 38.35; MS (ESI): 696.38  $[\text{M}+\text{Na}]^+$ , calcd. 696.29 for  $\text{C}_{42}\text{H}_{43}\text{NO}_7 + \text{Na}^+$

### Compound 86

Compound **86** was prepared according to general procedure described above. White solid, m.p. 125-127°C, 246 mg, 88% yield. Rf: 0.18 (Methanol: dichloromethane 0.5: 9.5);  $[\alpha]_D^{20} +19.1$  ( $c = 1$ ,  $\text{CHCl}_3$ ).  $^1\text{H}$  NMR (300 MHz,  $\text{CDCl}_3$ ):  $\delta$  7.40-7.21 (20 H, m, Har), 7.12 (1 H, m, NH), 6.91 (2 H, d,  $J = 8.5$  Hz, Har), 6.72 (2 H, d,  $J = 8.5$  Hz, Har), 4.57-4.44 (8 H, m, 4  $\text{OCH}_2\text{Ph}$ ), 4.33-4.26 (1 H, m, H-1), 4.05-4.01 (1 H, m, H-5), 3.92 (1 H, t,  $J = 9.4$  Hz, H-6), 3.78-3.75 (1 H, m, H-3), 3.65-3.58 (2 H, m, H-4, H-2), 3.44 (1 H, dd,  $J = 10.4, 3.4$  Hz, H-6), 3.37-3.26 (2 H, m,  $\text{HNCH}_2$ ), 2.65-2.47 (4 H, m,  $\text{CH}_2\text{CO}$ ,  $\text{CH}_2\text{Ph}$ );  $^{13}\text{C}$  NMR (75 MHz,  $\text{CDCl}_3$ ):  $\delta$  171.13, 154.95, 137.78, 137.71, 137.67, 137.61, 130.01, 129.62, 128.41, 128.37, 128.22, 128.05, 127.92, 127.83, 127.79, 127.68, 127.55, 115.50, 115.34, 75.34, 74.58, 74.45, 74.05, 73.32, 73.14, 72.77, 72.61, 71.69, 67.82, 67.71, 40.97, 37.10, 34.64; MS (ESI): 702.59  $[\text{M}+\text{H}]^+$ , calcd. 702.34 for  $\text{C}_{44}\text{H}_{47}\text{NO}_7 + \text{H}^+$

### Compound 87

Compound **87** was prepared according to general procedure described for **81-86** amides. Colourless oil, 108 mg, 78% yield. Rf: 0.12 (Methanol: dichloromethane 0.5: 9.5);  $[\alpha]_D^{20} +32.80$  ( $c = 1$ ,  $\text{CHCl}_3$ ).  $^1\text{H}$  NMR (300 MHz,  $\text{CDCl}_3$ ):  $\delta$  7.82 (2 H, t,  $J = 9.1$  Hz, Har), 7.48-7.45 (1 H, m, Har), 7.35-7.30 (1 H, m, Har), 5.28-3.24 (1 H, m, H-3), 5.18 (1 H, dd,  $J = 7.4, 3.3$  Hz, H-2), 5.03-4.99 (1 H, m, H-4), 4.61-4.49 (2 H, m, H-6, H-1), 4.18-4.06 (2 H, m, H-6, H-5), 2.83-2.81 (2 H, m,  $\text{CH}_2\text{CO}$ ), 2.11, 2.09, 2.05, 2.02 (12 H, 4 s, 4 OAc);  $^{13}\text{C}$  NMR (75 MHz,  $\text{CDCl}_3$ ):  $\delta$  170.82, 169.61, 169.41, 169.26, 167.79, 158.17, 147.99, 132.05, 126.36, 124.08, 121.51, 120.68, 73.11, 68.51, 67.75, 67.30, 67.10, 60.60, 37.67, 20.75, 20.63, 20.60; MS (ESI): 523.12  $[\text{M}+\text{H}]^+$ , calcd. 523.13 for  $\text{C}_{23}\text{H}_{26}\text{N}_2\text{O}_{10}\text{S} + \text{H}^+$

## Compound 88

Compound **88** was prepared according to general procedure described for **81-86** amides. Colourless oil, 192.7 mg, 68% yield. Rf: 0.15 (Methanol: dichloromethane 0.5: 9.5);  $[\alpha]_D^{20} +11.68$  ( $c = 1$ ,  $\text{CHCl}_3$ ).  $^1\text{H}$  NMR (300 MHz,  $\text{CDCl}_3$ ):  $\delta$  8.41 (1 H, brs, NH), 7.57 (1 H, d,  $J = 7.7$  Hz, Har), 7.35 (1 H, d,  $J = 7.4$  Hz, Har), 7.21-7.16 (1 H, m, Har), 7.13-7.07 (1 H, m, Har), 7.03 (1 H, d,  $J = 2.4$  Hz,  $\text{CH}=\text{C}$ ), 6.11 (1 H, brs, HN), 5.22 (1 H, dd,  $J = 6.8, 3.1$  Hz, H-3), 5.10-5.05 (2 H, m, H-4, H-2), 4.39-4.33 (1 H, m, H-1), 4.26 (1 H, dd,  $J = 12.1, 6.7$  Hz, H-6), 4.09 (1 H, dd,  $J = 12.1, 4.2$  Hz, H-6), 3.89-3.83 (1 H, m, H-5), 3.63-3.56 (2 H, m,  $\text{HNCH}_2$ ), 2.97 (2H, t,  $J = 6.7$  Hz,  $\text{HNCH}_2\text{CH}_2$ ), 2.51-2.27 (2 H, m,  $\text{CH}_2\text{CO}$ ), 2.06, 2.05, 2.04, 2.02 (12 H, 4 s, 4 OAc);  $^{13}\text{C}$  NMR (75 MHz,  $\text{CDCl}_3$ ):  $\delta$  170.62, 169.87, 169.62, 169.46, 168.73, 136.35, 127.31, 122.10, 122.05, 119.33, 118.55, 112.70, 111.27, 71.77, 69.59, 69.17, 67.84, 67.34, 61.52, 39.93, 37.18, 25.07, 20.70, 20.64; MS (ESI): 555.32  $[\text{M}+\text{Na}]^+$ , calcd. 555.19 for  $\text{C}_{26}\text{H}_{32}\text{N}_2\text{O}_{10} + \text{Na}^+$

## Compound 89 : full structural characterization

Compound **89** was prepared according to general procedure described for **81-86** amides. White solid, 170 mg, 72% yield. Rf: 0.23 (Methanol: dichloromethane 0.4:9.6);  $[\alpha]_D^{20} +15.48$  ( $c = 1$ ,  $\text{CHCl}_3$ ).  $^1\text{H}$  NMR (600 MHz,  $\text{CDCl}_3$ ):  $\delta$  7.54 (2 H, sb, NH, Har), 7.29 (3 H, m, Har), 5.27 (1 H, dd,  $J_{1,2} = 5.4$  Hz,  $J_{2,3} = 3.3$  Hz, H-2), 5.19 (1 H, dd,  $J_{3,4} = 7.0$ , Hz, H-3), 5.08 (1 H, t,  $J_{3,4} = J_{4,5} = 7.0$  Hz, H-4), 4.58 (1 H, ddd,  $J_{1,\text{CH}_2\text{A}} = 8.6$  Hz,  $J_{1,2} = 5.4$  Hz,  $J_{1,\text{CH}_2\text{B}} = 5.2$  Hz, H-1), 4.40 (1 H, dd,  $J = 12.0, 6.9$  Hz, H-6a), 4.10 (1 H, dd,  $J = 12.1, 4.0$  Hz, H-6b), 3.88 (1 H, dd,  $J = 10.3, 6.2$  Hz, H-5), 2.98 (1 H, dd,  $J_{\text{CH}_2\text{A},\text{CH}_2\text{B}} = 14.7$  Hz,  $J_{\text{CH}_2\text{A},1} = 8.6$  Hz,  $\text{CH}_2\text{A}\text{CO}$ ), 2.90 (1 H, dd,  $J_{\text{CH}_2\text{A},\text{CH}_2\text{B}} = 14.7$  Hz,  $J_{\text{CH}_2\text{B},1} = 5.2$  Hz,  $\text{CH}_2\text{B}\text{CO}$ ), 2.04, (9 H, s, 3 OAc), 1.95 (3H, s, OAc);  $^{13}\text{C}$  NMR (125 MHz,  $\text{CDCl}_3$ ):  $\delta$  170.5, 170.0, 169.7, 169.4, 169.4 (CO), 147.8, 136.32, 129.33, 128.90, 122.6, 72.66, 69.3, 68.9, 67.8, 67.2, 61.3, 37.6, 20.7, 20.7, 20.6, 20.5. ESI<sup>+</sup>-HRMS:  $[\text{M}+\text{H}]^+$  calcd for  $\text{C}_{23}\text{H}_{28}\text{N}_3\text{O}_{10}$ , 506.1769; found, 506.1787.



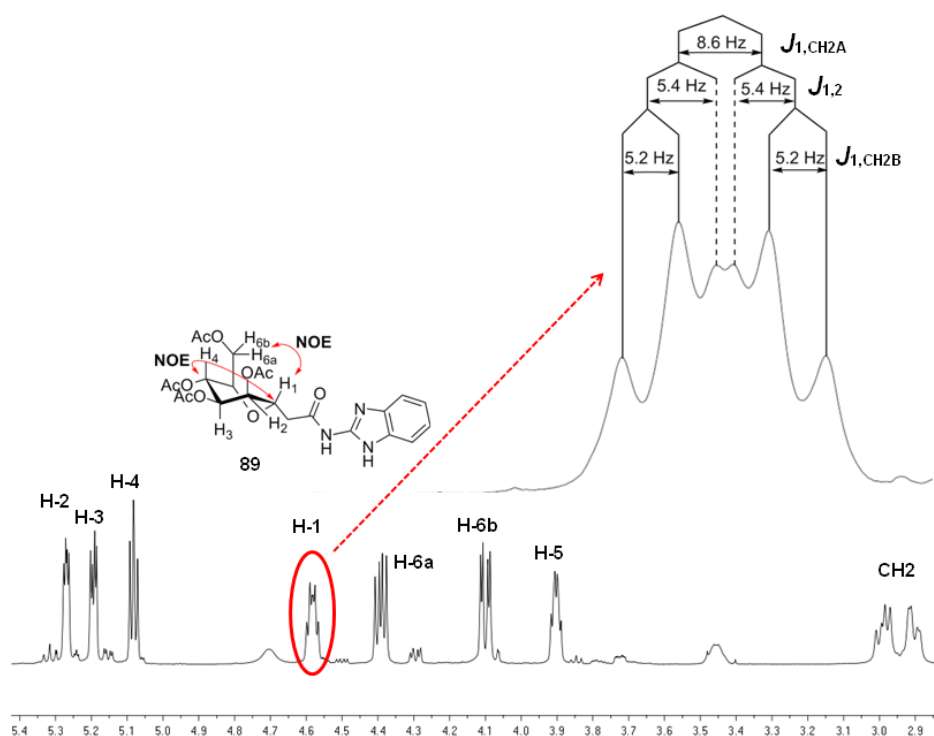

**Figure S9.** 600 MHz  $^1\text{H}$ -NMR ( $\text{CDCl}_3$ ) of **89** illustrating the complete signal analysis of H1 and its connectivity (NOE) to H6a and H4, hence a skewed-boat conformation.

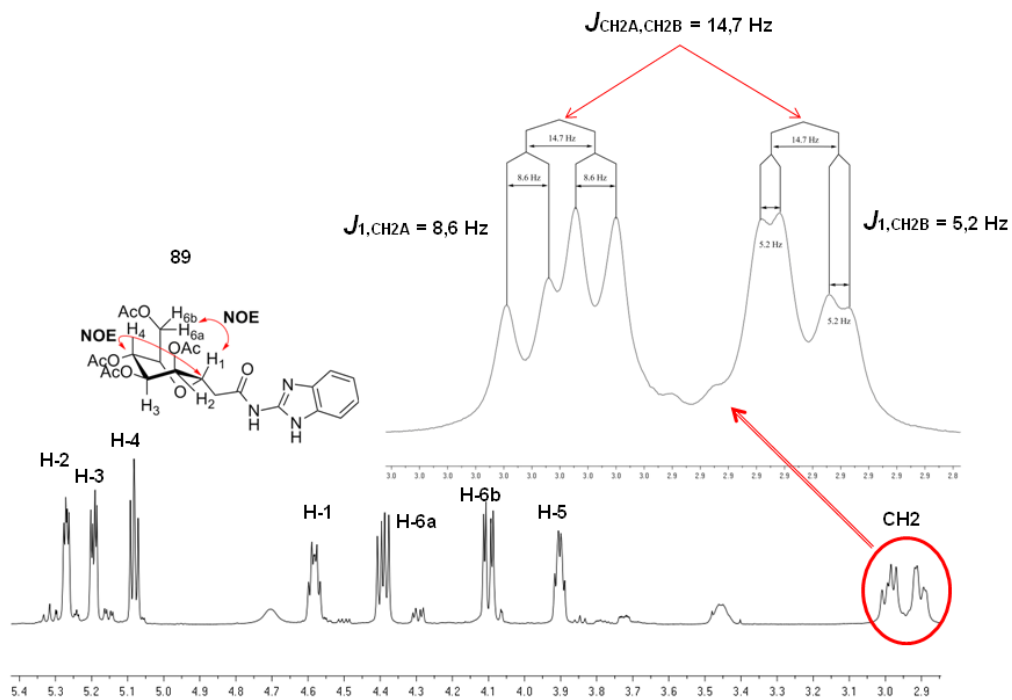

**Figure S10.** 600 MHz  $^1\text{H}$ -NMR ( $\text{CDCl}_3$ ) of **89** with inset showing the exo-methylene HAB system.

### Compound 90

Compound **90** was prepared according to general procedure described for **81-86** amides. Colourless oil, 91 mg, 69% yield. Rf: 0.18 (Methanol: dichloromethane 0.5: 9.5);  $[\alpha]_D^{20} +2.87$  ( $c = 1$ ,  $\text{CHCl}_3$ ).  $^1\text{H}$  NMR (300 MHz,  $\text{CDCl}_3$ ):  $\delta$  7.53-7.48 (2 H, m, Har), 7.29-7.24 (2 H, m, Har), 5.31-3.25 (1 H, m, H-3), 5.18 (1 H, dd,  $J = 6.8, 3.1$  Hz, H-2), 5.07 (1 H, t,  $J = 6.1$  Hz, H-4), 4.61-4.54 (1 H, m, H-1), 4.41 (1 H, dd,  $J = 12.1, 6.8$  Hz, H-6), 4.11 (1 H, dd,  $J = 12.1, 4.1$  Hz, H-6), 3.91-3.85 (1 H, m, H-5), 3.01-2.86 (2 H, m,  $\text{CH}_2\text{CO}$ ), 2.04, 2.0, 1.97, 1.95 (12 H, 4 s, 4 OAc).  $^{13}\text{C}$  NMR (75 MHz,  $\text{CDCl}_3$ ):  $\delta$  170.54, 170.01, 169.69, 169.46, 169.42, 147.85, 122.67, 72.29, 69.26, 68.92, 67.83, 67.20, 61.27, 37.62, 20.74, 20.69, 20.60, 20.52. MS (ESI): 506.16  $[\text{M}+\text{H}]^+$ , calcd. 506.17 for  $\text{C}_{23}\text{H}_{27}\text{N}_3\text{O}_{10} + \text{H}^+$

### Compound 91

Compound **91** was prepared according to general procedure of debenzylation described above. Colourless oil, 30 mg, 83% yield.  $[\alpha]_D^{20} +43.69$  ( $c = 1$ ,  $\text{CH}_3\text{OH}$ ).  $^1\text{H}$  NMR (300 MHz,  $\text{CD}_3\text{OD}$ ):  $\delta$  7.56 (2 H, d,  $J = 7.9$  Hz, Har), 7.28 (2 H, t,  $J = 7.9$  Hz, Har), 7.07 (1 H, t,  $J = 7.3$  Hz, Har), 4.41-4.35 (1 H, m, H-1), 3.87 (1 H, dd,  $J = 12.1, 6.6$  Hz, H-6), 3.79-3.60 (5 H, m, H-6, H-5, H-4, H-3, H-2), 2.78 (1 H, dd,  $J = 14.8, 8.9$  Hz,  $\text{CH}_2\text{CO}$ ), 2.66 (1 H, dd,  $J = 14.8, 5.1$  Hz,  $\text{CH}_2\text{CO}$ );  $^{13}\text{C}$  NMR (75 MHz,  $\text{CD}_3\text{OD}$ ):  $\delta$  171.62, 139.67, 129.74, 125.29, 121.47, 121.32, 77.63, 73.89, 72.47, 71.70, 69.63, 62.19, 38.54; MS (ESI): 320.10  $[\text{M}+\text{Na}]^+$ , calcd. 320.12 for  $\text{C}_{14}\text{H}_{18}\text{NO}_6 + \text{H}^+$

### Compound 92

Compound **92** was prepared according to general procedure of debenzylation described above. Colourless oil, 16 mg, 88% yield.  $[\alpha]_D^{20} +21.43$  ( $c = 1$ ,  $\text{CH}_3\text{OH}$ ).  $^1\text{H}$  NMR (300 MHz,  $\text{CD}_3\text{OD}$ ):  $\delta$  7.38-7.23 (5 H, m, Har), 4.88-4.62 (3 H, m, H-1,  $\text{CH}_2\text{Ph}$ ), 3.82 (1 H, dd,  $J = 11.8, 6.3$  Hz, H-6), 3.74-3.62 (5 H, m, H-6, H-5, H-4, H-3, H-2), 2.88 (1 H, dd,  $J = 14.8, 9.1$  Hz,  $\text{CH}_2\text{CO}$ ), 2.72 (1 H, dd,  $J = 14.8, 5.1$  Hz,  $\text{CH}_2\text{CO}$ );  $^{13}\text{C}$  NMR (75 MHz,  $\text{CD}_3\text{OD}$ ):  $\delta$  - 173.20, 139.85, 129.52, 128.55, 128.18, 77.36, 74.21, 72.47, 71.82, 69.54, 62.23, 44.16, 37.59, 31.97, 27.00, 23.76; HRMS; MS (ESI): 334.13  $[\text{M}+\text{Na}]^+$ , calcd. 334.14 for  $\text{C}_{15}\text{H}_{21}\text{NO}_6 + \text{Na}^+$

### Compound 93

Compound **93** was prepared according to general procedure of debenzylation described above. Colourless oil, 33 mg, 86% yield.  $[\alpha]_D^{20} +39.6$  ( $c = 1$ ,  $\text{CH}_3\text{OH}$ ).  $^1\text{H}$  NMR (300 MHz,  $\text{CD}_3\text{OD}$ ):  $\delta$  7.25-7.20 (2 H, m, Har), 7.15-7.09 (3 H, m, Har), 4.20-4.15 (1 H, m, H-1), 3.74-3.44 (5 H, m, H-6, H-5, H-4, H-3, H-2),

3.47-3.39 (1 H, m, H-6), 3.06 (2 H, t,  $J = 6.8$  Hz,  $\text{HNCH}_2$ ), 2.61-2.48 (3 H, m,  $\text{HCHCO}$ ,  $\text{CH}_2\text{Ph}$ ), 2.27 (1 H, dd,  $J = 15.1, 4.6$  Hz,  $\text{HCHCO}$ ), 1.68 (2 H, q,  $J = 7.1$  Hz,  $\text{HNCH}_2\text{CH}_2$ );  $^{13}\text{C}$  NMR (75 MHz,  $\text{CD}_3\text{OD}$ ):  $\delta$  163.02, 132.70, 119.31, 119.19, 116.75, 65.71, 65.16, 61.47, 61.21, 57.77, 51.59, 29.69, 26.06, 23.06, 20.63; MS (ESI): 340.17  $[\text{M}+\text{H}]^+$ , calcd. 340.17 for  $\text{C}_{17}\text{H}_{25}\text{NO}_6 + \text{H}^+$

#### Compound 94

Compound **94** was prepared according to general procedure of debenzylation described above. Colourless oil. 95 mg, 83% yield.  $[\alpha]_D^{20} +28.4$  ( $c = 1$ ,  $\text{CH}_3\text{OH}$ ).  $^1\text{H}$  NMR (300 MHz,  $\text{CD}_3\text{OD}$ ):  $\delta$  7.46-7.39 (4 H, m, Har), 4.39-4.36 (1 H, m, H-1), 3.83-3.81 (3 H, m, 2 H6, H5), 3.76-3.70 (3 H, m, H-4, H-3, H-2), 2.83 (1 H, dd,  $J = 14.8, 9.6$  Hz,  $\text{CH}_2\text{CO}$ ), 2.61 (1 H, dd,  $J = 14.8, 4.9$  Hz,  $\text{CH}_2\text{CO}$ ), 2.09 (3 H, s,  $\text{OCCCH}_3$ ).  $^{13}\text{C}$  NMR (75 MHz,  $\text{CD}_3\text{OD}$ ):  $\delta$  172.30, 171.62, 135.86, 135.42, 122.26, 121.98, 76.66, 75.09, 72.16, 71.93, 68.94, 62.13, 37.86, 23.78; MS (ESI): 355.15  $[\text{M}+\text{H}]^+$ , calcd. 355.15 for  $\text{C}_{16}\text{H}_{22}\text{N}_2\text{O}_7 + \text{H}^+$

#### Compound 95

Compound **95** was prepared according to general procedure of debenzylation described above. Colourless oil, 43 mg, 91% yield.  $[\alpha]_D^{20} +32.8$  ( $c = 1$ ,  $\text{CH}_3\text{OH}$ ).  $^1\text{H}$  NMR (300 MHz,  $\text{CD}_3\text{OD}$ ):  $\delta$  7.33 (2 H, d,  $J = 8.8$  Hz, Har), 6.73 (2 H, d,  $J = 8.8$  Hz, Har), 4.39-4.33 (1 H, m, H-1), 3.86 (1 H, dd,  $J = 12.1, 6.8$  Hz, H-6), 3.78-3.59 (5 H, m, H-6, H-5, H-4, H-3, H-2), 2.75 (1 H, dd,  $J = 14.8, 9.1$  Hz,  $\text{CH}_2\text{CO}$ ), 2.65 (1 H, dd,  $J = 14.8, 4.9$  Hz,  $\text{CH}_2\text{CO}$ );  $^{13}\text{C}$  NMR (75 MHz,  $\text{CD}_3\text{OD}$ ):  $\delta$  - 171.33, 155.48, 131.48, 123.62, 116.17, 77.52, 74.06, 72.48, 71.75, 69.61, 62.25, 38.30; MS (ESI): 314.12  $[\text{M}+\text{H}]^+$ , calcd. 314.12 for  $\text{C}_{14}\text{H}_{19}\text{NO}_7 + \text{H}^+$

#### Compound 96

Compound **96** was prepared according to general procedure of debenzylation described above. Colourless oil, 88 mg, 83% yield.  $[\alpha]_D^{20} +22.6$  ( $c = 1$ ,  $\text{CH}_3\text{OH}$ ).  $^1\text{H}$  NMR (300 MHz,  $\text{CD}_3\text{OD}$ ):  $\delta$  7.01 (2 H, dd,  $J = 6.3, 1.9$  Hz, Har), 6.69 (2 H, dd,  $J = 6.3, 1.9$  Hz, Har), 4.29-4.23 (1 H, m, H-1), 3.82 (1 H, dd,  $J = 11.8, 6.6$  Hz, H-6), 3.78-3.59 (4 H, m, H-5, H-4, H-3, H-2), 3.56-3.51 (1 H, m, H-6), 3.34 (2 H, t,  $J = 7.6$  Hz,  $\text{HNCH}_2\text{CH}_2$ ), 2.68 (2 H, t,  $J = 7.6$  Hz,  $\text{HNCH}_2\text{CH}_2$ ), 2.56 (1 H, dd,  $J = 14.8, 9.0$  Hz,  $\text{CH}_2\text{CO}$ ), 2.44 (1 H, dd,  $J = 14.8, 5.2$  Hz,  $\text{CH}_2\text{CO}$ );  $^{13}\text{C}$  NMR (75 MHz,  $\text{CD}_3\text{OD}$ ):  $\delta$  173.14, 156.87, 131.26, 130.71, 116.25, 77.25, 74.18, 72.41, 71.78, 69.49, 62.20, 42.43, 37.44, 35.63; MS (ESI): 365.40  $[\text{M}+\text{Na}]^+$ , calcd. 365.14 for  $\text{C}_{16}\text{H}_{23}\text{NO}_7 + \text{Na}^+$

## Compound 97

Compound **97** was prepared according to general procedure of de-*O*-acetylation described above. 91 mg, 91% yield.  $[\alpha]_D^{20} +19.8$  ( $c = 1$ , CH<sub>3</sub>OH). <sup>1</sup>H NMR (300 MHz, CD<sub>3</sub>OD):  $\delta$  7.56 (2 H, d,  $J = 8.5$  Hz, Har), 7.29 (2 H, d,  $J = 8.5$  Hz, Har), 4.48 (1 H, br s, NH), 4.39-4.34 (1 H, m, H-1), 3.88 (1 H, dd,  $J = 11.8, 6.9$  Hz, H-6), 3.77-3.62 (5 H, m, H-6, H-5, H-4, H-3, H-2), 2.76 (1 H, dd,  $J = 14.8, 9.0$  Hz, CH<sub>2</sub>CO), 2.69 (1 H, dd,  $J = 15.9, 5.9$  Hz, CH<sub>2</sub>CO); <sup>13</sup>C NMR (75 MHz, CD<sub>3</sub>OD):  $\delta$  171.67, 138.59, 130.06, 129.71, 122.72, 122.58, 77.80, 73.55, 72.46, 71.59, 69.71, 62.14, 38.63; MS (ESI): 354.40 [M+Na]<sup>+</sup>, calcd. 354.07 for C<sub>14</sub>H<sub>18</sub>ClNO<sub>6</sub> + Na<sup>+</sup>

## Compound 98

Compound **98** was prepared according to general procedure of de-*O*-acetylation described above. 68 mg, 91% yield.  $[\alpha]_D^{20} +23.8$  ( $c = 1$ , CH<sub>3</sub>OH). <sup>1</sup>H NMR (600 MHz, DMSO-*d*<sub>6</sub>):  $\delta$  12.3 (1H, sb, NH), 7.95 (1H, d,  $J = 7.6$  Hz, Har), 7.71 (1H, d,  $J = 7.6$  Hz, Har), 7.41 (1H, ddd,  $J = 8.2, 7.2, 1.3$  Hz, Har), 7.28 (1H, ddd,  $J = 8.2, 7.3, 1.2$  Hz, Har), 4.83 (1H, d, 4.4 Hz, OH-4), 4.72 (1H, d,  $J = 4.5$  Hz, OH-2), 4.63 (1H, sb, OH-3), 4.23 (1H, t,  $J = 5.8$  Hz, OH-6), 4.16 (1H, m, H-1), 3.52 (4H, m, H-2, H-3, H-6<sup>a</sup> and H-6<sup>b</sup>), 3.46 (1H, td,  $J = 6.4, 4.7$  Hz, H-4), 3.36 (1H, td,  $J = 6.0, 4.3$  Hz, H-5) and 2.72 ppm (2H, m, CH<sub>2</sub>CO); <sup>13</sup>C NMR (150 MHz, DMSO-*d*<sub>6</sub>):  $\delta$  170.8 (CO), 158.2 (C<sub>q</sub>-arom), 149.0 (C<sub>q</sub>-arom), 131.9 (C<sub>q</sub>-arom), 126.5, 124.0, 122.2, 121.0 (4 x CH-arom), 77.3 (C-5), 71.9 (C-1), 71.4, 70.0, 68.5 (C-2, C-3, C-4), 61.1 (C-6) and 37.4 ppm (CH<sub>2</sub>). MS (ESI): 355.10 [M+H]<sup>+</sup>, calcd. 355.10 for C<sub>15</sub>H<sub>18</sub>N<sub>2</sub>O<sub>6</sub>S + H<sup>+</sup>.

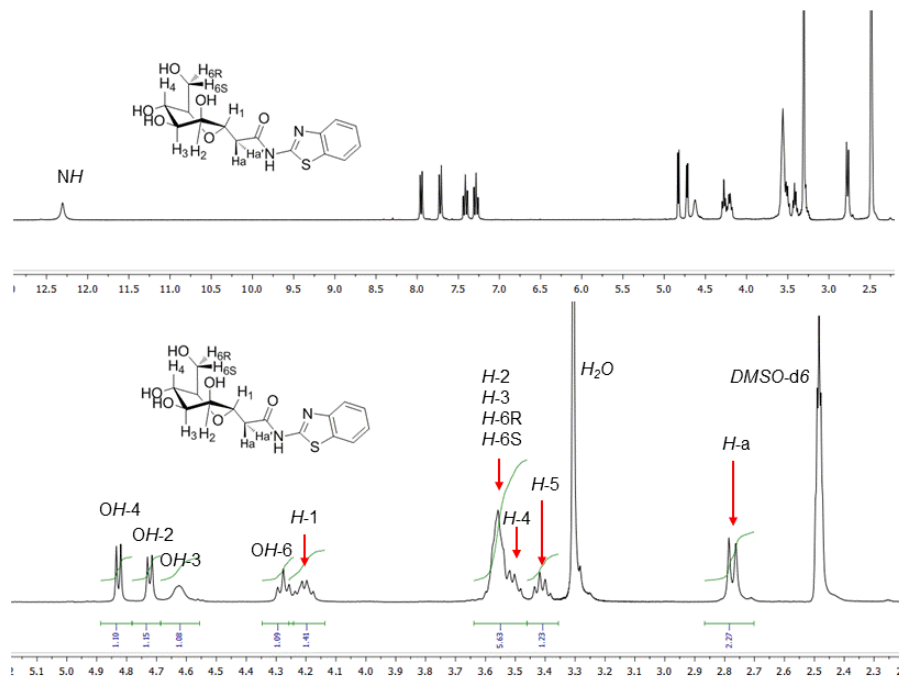

**Figure S11.** 300 MHz <sup>1</sup>H-NMR (DMSO-*d*<sub>6</sub>) of Cpd **98**.

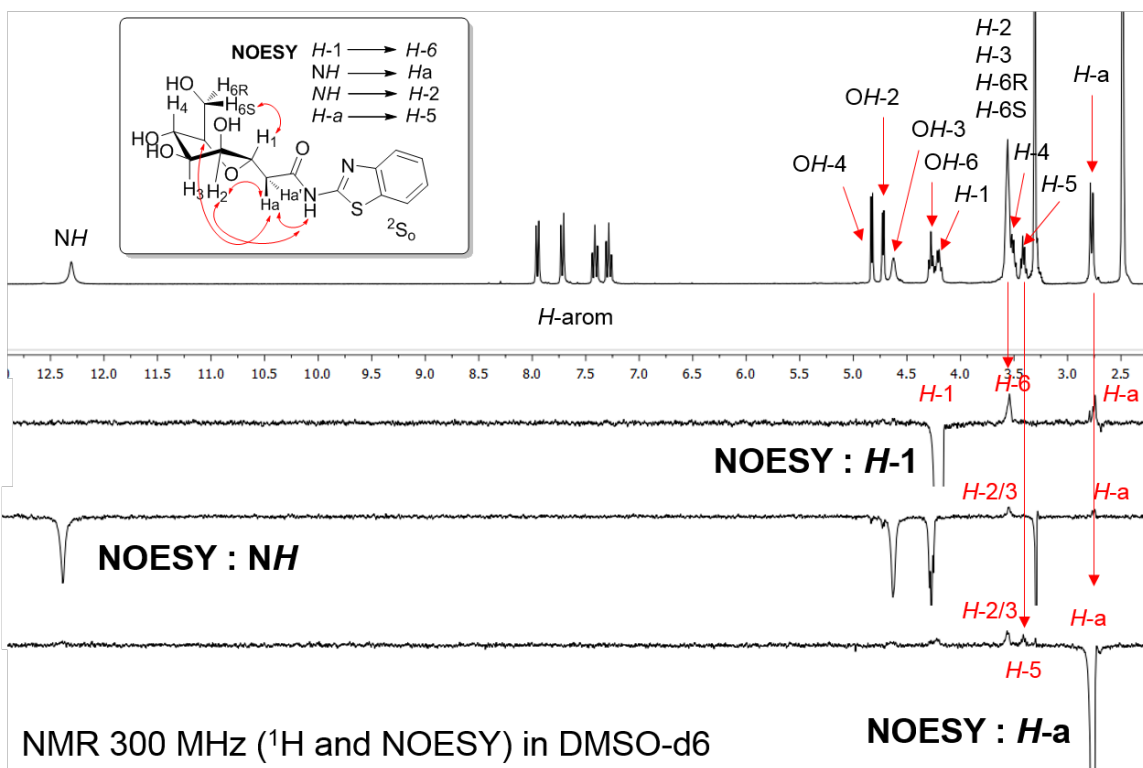

**Figure S12.** Cpd **98** NOESY spectrum.

### Compound **99**

Compound **99** was prepared according to general procedure of de-*O*-acetylation described above. 43 mg, 90% yield.  $[\alpha]_D^{20} +17.6$  ( $c = 1$ , CH<sub>3</sub>OH). <sup>1</sup>H NMR (300 MHz):  $\delta$  7.61-7.52 (2 H, m, Har), 7.27-7.24 (2 H, m, Har), 4.46-4.44 (1 H, m, H-1), 4.33-4.27 (1 H, m, H-6), 3.85-3.73 (4 H, m, H-6, H-5, H-4, H-3), 3.58-3.49 (1 H, m, H-2), 2.94 (1 H, dd,  $J = 14.8, 9.1$  Hz, CH<sub>2</sub>CO), 2.84 (1 H, dd,  $J = 14.8, 5.4$  Hz, CH<sub>2</sub>CO); <sup>13</sup>C NMR (75 MHz):  $\delta$  173.71, 147.16, 136.02, 123.78, 115.14, 77.26, 76.95, 74.26, 72.11, 71.48, 69.03, 62.11, 52.83, 37.18. ESI<sup>+</sup>-HRMS:  $[M+H]^+$  calcd for C<sub>15</sub>H<sub>21</sub>N<sub>4</sub>O<sub>5</sub>, 338.1347; found, 338.1352. MS (ESI): 338.13  $[M+H]^+$ , calcd. 338.14 for C<sub>15</sub>H<sub>19</sub>N<sub>3</sub>O<sub>6</sub> + H<sup>+</sup>

### Compound **100**

Compound **100** was prepared according to general procedure of de-*O*-acetylation described above. 86 mg, 78% yield.  $[\alpha]_D^{20} +22.6$  ( $c = 1$ , CH<sub>3</sub>OH). <sup>1</sup>H NMR (300 MHz, CD<sub>3</sub>OD):  $\delta$  8.09 (1 H, brs, NH), 7.56 (1 H, d,  $J = 7.4$  Hz, Har), 7.29 (1 H, d,  $J = 8.2$  Hz, Har), 7.09-7.07 (1 H, m, CH=C), 7.04-6.96 (1 H, m, Har), 4.28-4.25 (1 H, m, H-1), 3.83 (1 H, dd,  $J = 11.8, 6.9$  Hz, H-6), 3.71-3.65 (4 H, m, H-6, H-5, H-4, H-3), 3.55-3.48 (3 H, m, HNCH<sub>2</sub>CH<sub>2</sub>, H-2), 2.94 (3 H, t,  $J = 7.1$  Hz, HNCH<sub>2</sub>CH<sub>2</sub>), 2.57 (1 H, dd,  $J = 14.8, 9.1$  Hz, CH<sub>2</sub>CO), 2.84 (1 H, dd,  $J = 14.8, 4.9$  Hz, CH<sub>2</sub>CO); <sup>13</sup>C NMR (75 MHz, CD<sub>3</sub>OD):  $\delta$  173.21, 138.16,

128.76, 123.46, 122.30, 119.58, 119.26, 113.22, 112.22, 81.97, 77.36, 74.14, 72.46, 71.77, 69.55, 62.28, 41.39, 37.60, 26.22; MS (ESI): 365.40  $[M+H]^+$ , calcd. 365.40 for  $C_{18}H_{24}N_2O_6 + H^+$

### Compound 101

Compound **101** was prepared according to general procedure described above. Colourless oil, 115.6 mg, 83% yield. Rf: 0.19 (AcOEt: Hexanes 3: 7);  $[\alpha]_D^{20} +18.5$  ( $c = 1$ ,  $CHCl_3$ ).  $^1H$  NMR (300 MHz):  $\delta$  7.25-7.16 (5 H, m, Har), 5.18-5.14 (2 H, m, H-3, H-4), 5.11-5.08 (1 H, m, H-2), 4.26 (1 H, dd,  $J = 12.1$ , 6.3 Hz, H-6), 4.02 (1 H, dd,  $J = 12.1$ , 3.0 Hz, H-5), 3.89-3.84 (1 H, m, H-1), 3.80-3.75 (1 H, m, H-6), 3.65 (2 H, s,  $CH_2Ph$ ), 2.46-2.35 (2 H, m,  $CH_2CH_2CH_2S$ ), 2.08, 2.04, 2.01, 1.97 (12 H, 4 s, OAc), 1.87-1.76 (2 H, m,  $CH_2CH_2CH_2S$ ), 1.67-1.56 (2 H, m,  $CH_2CH_2CH_2S$ );  $^{13}C$  NMR (75 MHz):  $\delta$  170.55, 170.15, 169.86, 169.55, 138.23, 128.71, 128.41, 126.91, 74.68, 70.63, 70.12, 68.88, 66.75, 62.41, 36.04, 30.52, 27.20, 24.75, 20.86, 20.67, 20.65, 20.59; MS (ESI): 497.30  $[M+H]^+$ , calcd. 497.20 for  $C_{24}H_{32}SO_9 + H^+$

### Compound 102

Compound **102** was prepared according to general procedure described above. Colourless oil, 93 mg, 78% yield. Rf: 0.22 (AcOEt: Hexanes 3: 7);  $[\alpha]_D^{20} +25.6$  ( $c = 1$ ,  $CHCl_3$ ).  $^1H$  NMR (300 MHz):  $\delta$  5.30-5.13 (3 H, m, H-4, H-3, H-2), 4.30 (1 H, dd,  $J = 12.1$ , 6.3 Hz, H-6), 4.06 (1 H, dd,  $J = 12.1$ , 2.7 Hz, H-5), 3.97-3.92 (1 H, m, H-1), 3.87-3.82 (1 H, m, H-6), 2.56-2.45 (4 H, m,  $CH_2CH_2CH_2S$ ,  $SCH_2CH_2CH_2CH_3$ ), 2.12, 2.07, 2.05, 2.01 (12 H, 4 s, OAc), 1.96-1.85 (2 H, m,  $CH_2CH_2CH_2S$ ), 1.72-1.58 (2H, m,  $SCH_2CH_2CH_2CH_3$ ), 1.56-1.51 (2 H, m,  $CH_2CH_2CH_2S$ ), 1.43-1.31 (2 H, m,  $SCH_2CH_2CH_2CH_3$ ), 0.89 (3 H, t,  $J = 7.4$  Hz,  $SCH_2CH_2CH_2CH_3$ );  $^{13}C$  NMR (75 MHz):  $\delta$  170.18, 169.92, 169.88, 169.57, 74.70, 70.69, 70.17, 68.90, 66.80, 62.41, 31.63, 31.34, 27.26, 25.23, 21.89, 20.87, 20.67, 20.65, 20.60, 13.53; MS (ESI): 463.30  $[M+H]^+$ , calcd. 463.20 for  $C_{21}H_{34}SO_9 + H^+$

### Compound 103

Compound **103** was prepared according to general procedure described above. Colourless oil, 165 mg, 91% yield. Rf: 0.22 (AcOEt: Hexanes 3: 7);  $[\alpha]_D^{20} +22.4$  ( $c = 1$ ,  $CHCl_3$ ).  $^1H$  NMR (300 MHz):  $\delta$  5.23-5.12 (3 H, m, H-4, H-3, H-2), 4.29 (1 H, dd,  $J = 12.0$ , 6.3 Hz, H-6), 4.05 (1 H, dd,  $J = 12.0$ , 2.7 Hz, H-5), 3.96-3.91 (1 H, m, H-1), 3.86-3.82 (1 H, m, H-6), 2.55-2.42 (4 H, m,  $CH_2CH_2CH_2S$ ,  $SCH_2CH_2CH_3$ ), 2.08, 2.07, 2.04, 2.01 (12 H, 4 s, OAc), 1.96-1.84 (2 H, m,  $CH_2CH_2CH_2S$ ), 1.71-1.51 (4 H, m,  $CH_2CH_2CH_2S$ ,  $SCH_2CH_2CH_3$ ), 0.95 (3 H, t,  $J = 7.41$  Hz,  $SCH_2CH_2CH_3$ );  $^{13}C$  NMR (75 MHz):  $\delta$  170.54,

170.15, 169.85, 169.55, 74.66, 70.66, 70.15, 68.87, 66.76, 62.38, 33.95, 31.24, 27.23, 25.22, 22.80, 20.84, 20.64, 20.63, 20.57, 13.36; MS (ESI): 449.20  $[M+H]^+$ , calcd. 449.17 for  $C_{20}H_{32}SO_9 + H^+$

### Compound 104

Compound **104** was prepared according to general procedure described above. Colourless oil, 145 mg, 95% yield. Rf: 0.22 (AcOEt: Hexanes 3: 7);  $[\alpha]_D^{20} +29.3$  ( $c = 1$ ,  $CHCl_3$ ).  $^1H$  NMR (300 MHz):  $\delta$  5.27-5.13 (2 H, m, H-4, H-3), 5.12-5.11 (1 H, m, H-2), 4.29 (1 H, dd,  $J = 12.1, 6.3$  Hz, H-6), 4.05 (1 H, dd,  $J = 12.1, 2.7$  Hz, H-5), 3.96-3.91 (1 H, m, H-1), 3.86-3.81 (1 H, m, H-6), 2.59-2.52 (4 H, m,  $CH_2CH_2CH_2S$ ,  $SCH_2CH_3$ ), 1.91, 1.89, 1.88, 1.73 (12 H, 4 s, OAc), 1.84-1.74 (2 H, m,  $CH_2CH_2CH_2S$ ), 1.73-1.59 (2 H, m,  $CH_2CH_2CH_2S$ ), 1.22 (3 H, t,  $J = 7.4$  Hz,  $SCH_2CH_3$ );  $^{13}C$  NMR (75 MHz):  $\delta$  170.55, 170.16, 169.86, 169.55, 74.64, 70.65, 70.14, 68.86, 66.76, 62.40, 30.79, 27.22, 25.66, 25.11, 20.84, 20.64, 20.57, 14.64; MS (ESI): 435.16  $[M+H]^+$ , calcd. 435.16 for  $C_{19}H_{30}SO_9 + H^+$

### Compound 105

Compound **105** was prepared according to general procedure described above. Colourless oil, 136 mg, 71% yield. Rf: 0.18 (AcOEt: Hexanes 3: 7);  $[\alpha]_D^{20} +32.6$  ( $c = 1$ ,  $CHCl_3$ ).  $^1H$  NMR (300 MHz):  $\delta$  5.25-5.15 (3 H, m, H-4, H-3, H-2), 4.31 (1 H, dd,  $J = 12.1, 6.0$  Hz, H-6), 4.07 (1 H, dd,  $J = 12.1, 2.7$  Hz, H-5), 3.97-3.93 (1 H, m, H-1), 3.87-3.83 (1 H, m, H-6), 2.89 (1 H, sep,  $J = 6.6$  Hz,  $SCH(CH_3)_2$ ), 2.62-2.50 (2 H, m,  $CH_2CH_2CH_2S$ ), 2.12, 2.08, 2.03, 2.02 (12 H, 4 s, OAc), 1.91-1.86 (2 H, m,  $CH_2CH_2CH_2S$ ), 1.75-1.61 (2 H, m,  $CH_2CH_2CH_2S$ ), 1.23 (6 H, d,  $J = 6.6$  Hz,  $SCH(CH_3)_2$ );  $^{13}C$  NMR (75 MHz):  $\delta$  170.61, 170.22, 169.91, 169.60, 74.74, 70.72, 70.18, 68.94, 66.81, 62.45, 34.74, 29.78, 27.43, 25.45, 23.34, 20.90, 20.68, 20.63; MS (ESI): 449.20  $[M+H]^+$ , calcd. 449.17 for  $C_{20}H_{32}SO_9 + H^+$

### Compound 106

Compound **106** was prepared according to general procedure of de-*O*-acetylation described above. 48 mg, 92% yield.  $[\alpha]_D^{20} +41.7$  ( $c = 1$ ,  $CH_3OH$ ).  $^1H$  NMR (300 MHz,  $D_2O$ ):  $\delta$  7.02-6.92 (5 H, m, Har), 3.70-3.58 (4 H, m, 2 H-6, H-5, H-1), 3.56-3.53 (2 H, m, H-3, H-2), 3.40 (2 H, s,  $CH_2Ph$ ), 3.20-3.14 (1 H, m, H-4), 1.49-1.39 (4 H, m,  $CH_2CH_2CH_2S$ ,  $CH_2CH_2CH_2S$ );  $^{13}C$  NMR (75 MHz,  $D_2O$ ):  $\delta$  138.16, 128.46, 128.11, 126.54, 77.54, 72.79, 71.16, 70.57, 66.59, 60.74, 35.08, 30.21, 26.26, 24.68; HRMS (ESI): 329.1422  $[M+H]^+$ , calcd. 329.1417 for  $C_{16}H_{24}SO_5 + H^+$

### Compound 107

Compound **107** was prepared according to general procedure of de-*O*-acetylation described above. 58 mg, 95% yield.  $[\alpha]_D^{20} +19.6$  ( $c = 1$ , CH<sub>3</sub>OH). <sup>1</sup>H NMR (300 MHz, D<sub>2</sub>O): δ 3.78-3.71 (3 H, m, H-6, H-5, H-1), 3.68-3.59 (2 H, m, H-6, H-3), 3.57-3.50 (1H, m, H-2), 3.35-3.32 (1 H, m, H-4), 2.47-2.38 (4 H, m, CH<sub>2</sub>CH<sub>2</sub>CH<sub>2</sub>S, SCH<sub>2</sub>CH<sub>2</sub>CH<sub>2</sub>CH<sub>3</sub>), 1.76-1.69 (2 H, m, CH<sub>2</sub>CH<sub>2</sub>CH<sub>2</sub>S), 1.59-1.37 (4 H, m, SCH<sub>2</sub>CH<sub>2</sub>CH<sub>2</sub>CH<sub>3</sub>, CH<sub>2</sub>CH<sub>2</sub>CH<sub>2</sub>S), 1.31-1.19 (2 H, m, SCH<sub>2</sub>CH<sub>2</sub>CH<sub>2</sub>CH<sub>3</sub>), 0.76 (3 H, t,  $J = 7.2$  Hz, SCH<sub>2</sub>CH<sub>2</sub>CH<sub>2</sub>CH<sub>3</sub>); <sup>13</sup>C NMR (75 MHz, D<sub>2</sub>O): δ 77.51, 73.08, 71.18, 70.56, 66.65, 60.75, 30.94, 30.79, 26.36, 25.04, 21.24, 12.87; HRMS (ESI): 317.1407 [M+Na]<sup>+</sup>, calcd. 317.1501 for C<sub>13</sub>H<sub>26</sub>SO<sub>5</sub> + H<sup>+</sup>

### Compound 108

Compound **108** was prepared according to general procedure of de-*O*-acetylation described above. 86 mg, 92 % yield.  $[\alpha]_D^{20} +23.6$  ( $c = 1$ , CH<sub>3</sub>OH). <sup>1</sup>H NMR (300 MHz, D<sub>2</sub>O): δ 3.79-3.71 (3 H, m, H-6, H-5, H-1), 3.67-3.63 (1 H, m, H-6), 3.56 (1 H, dd,  $J = 12.1, 5.6$  Hz, H-3), 3.51-3.44 (1H, m, H-2), 3.39-3.34 (1H, m, H-4), 1.57-1.38 (4 H, m, CH<sub>2</sub>CH<sub>2</sub>CH<sub>2</sub>S, SCH<sub>2</sub>CH<sub>2</sub>CH<sub>3</sub>), 1.76-1.67 (2 H, m, CH<sub>2</sub>CH<sub>2</sub>CH<sub>2</sub>S), 1.57-1.38 (4 H, m, CH<sub>2</sub>CH<sub>2</sub>CH<sub>2</sub>S, SCH<sub>2</sub>CH<sub>2</sub>CH<sub>3</sub>), 0.79 (3 H, t,  $J = 7.3$  Hz, SCH<sub>2</sub>CH<sub>2</sub>CH<sub>3</sub>); <sup>13</sup>C NMR (75 MHz, D<sub>2</sub>O): δ 77.52, 73.07, 71.04, 70.39, 66.85, 60.79, 32.80, 30.25, 26.08, 24.75, 21.89, 12.32; HRMS (ESI): 281.1417 [M+H]<sup>+</sup>, calcd. 281.1344 for C<sub>12</sub>H<sub>24</sub>SO<sub>5</sub> + H<sup>+</sup>

### Compound 109

Compound **109** was prepared according to general procedure of de-*O*-acetylation described above. 39 mg, 91% yield.  $[\alpha]_D^{20} +13.9$  ( $c = 1$ , CH<sub>3</sub>OH). <sup>1</sup>H NMR (300 MHz, D<sub>2</sub>O): δ 3.76-3.69 (4 H, m, 2 H-6, H-5, H-1), 3.61-3.41 (3 H, m, H-4, H-3, H-2), 2.51-2.43 (4 H, m, CH<sub>2</sub>CH<sub>2</sub>CH<sub>2</sub>S, SCH<sub>2</sub>CH<sub>3</sub>), 1.75-1.71 (2 H, m, CH<sub>2</sub>CH<sub>2</sub>CH<sub>2</sub>S), 1.65-1.48 (2 H, m, CH<sub>2</sub>CH<sub>2</sub>CH<sub>2</sub>S), 1.11 (3 H, t,  $J = 7.2$  Hz, SCH<sub>2</sub>CH<sub>3</sub>); <sup>13</sup>C NMR (75 MHz, D<sub>2</sub>O): δ 77.57, 73.08, 71.05, 70.37, 66.88, 60.81, 29.76, 26.07, 24.64, 13.48; HRMS (ESI): 267.1266 [M+H]<sup>+</sup>, calcd. 267.1260 for C<sub>11</sub>H<sub>22</sub>SO<sub>5</sub> + H<sup>+</sup>

### Compound 110

Compound **110** was prepared according to general procedure of de-*O*-acetylation described above. 68 mg, 91% yield.  $[\alpha]_D^{20} +23.8$  ( $c = 1$ , CH<sub>3</sub>OH). <sup>1</sup>H NMR (300 MHz, D<sub>2</sub>O): δ 3.79-3.71 (3 H, m, H-6, H-5, H-1), 3.67-3.63 (1 H, m, H-6), 3.57 (1 H, dd,  $J = 11.8, 5.8$  Hz, H-3), 3.51-3.44 (1 H, m, H-2), 3.38-3.33 (1 H, m, H-4), 2.87 (1 H, sep,  $J = 6.7$  Hz, SCH(CH<sub>3</sub>)<sub>2</sub>), 2.57-2.43 (2 H, m, CH<sub>2</sub>CH<sub>2</sub>CH<sub>2</sub>S), 1.80-1.67 (2 H, m, CH<sub>2</sub>CH<sub>2</sub>CH<sub>2</sub>S), 1.57-1.39 (2 H, m, CH<sub>2</sub>CH<sub>2</sub>CH<sub>2</sub>S), 1.10 (6 H, d,  $J = 6.6$  Hz, SCH(CH<sub>3</sub>)<sub>2</sub>); <sup>13</sup>C NMR (75



MHz, D<sub>2</sub>O):  $\delta$  77.52, 73.05, 71.02, 70.35, 66.83, 60.77, 34.07, 28.76, 26.16, 24.86, 22.06; HRMS (ESI): 303.1244 [M+Na]<sup>+</sup>, calcd. 303.1344 for C<sub>12</sub>H<sub>24</sub>SO<sub>5</sub> + Na<sup>+</sup>

### Compound 111

Compound **111** was prepared according to general Heck cross coupling procedure described above. Colourless oil, 61 mg, 92% yield. Rf: 0.27 (AcOEt: Hexanes 3: 7);  $[\alpha]_D^{20} +24.3$  ( $c = 1$ , CHCl<sub>3</sub>). <sup>1</sup>H NMR (300 MHz, CDCl<sub>3</sub>):  $\delta$  7.45-7.15 (5 H, m, Har), 6.51 (1 H, d,  $J = 15.6$  Hz, CH=CHPh), 6.20-6.06 (1 H, m, CH=CHPh), 5.31 (1 H, dd,  $J = 8.52, 3.3$  Hz, H-3), 5.24-5.15 (2 H, m, H-2, H-4), 4.34 (1 H, dd,  $J = 12.1, 6.8$  Hz, H-6), 4.19-4.06 (2 H, m, H-1, H-6), 3.95 (1 H, td,  $J = 11.2, 2.7$  Hz, H-5), 2.74-2.55 (2 H, m, CH<sub>2</sub>CH=CHPh). 2.10, 2.05 (12H, 4s, 4 OAc); <sup>13</sup>C NMR (75 MHz, CDCl<sub>3</sub>):  $\delta$  170.6, 170.13, 169.87, 169.63, 136.86, 133.07, 129.57, 128.45, 127.38, 126.09, 132.93, 73.93, 70.64, 68.62, 67.03, 62.24, 32.78, 20.86, 20.70, 20.64, 20.47; MS (ESI): 449.19 [M+H]<sup>+</sup>, calcd. 449.17 for C<sub>23</sub>H<sub>28</sub>O<sub>9</sub> + H<sup>+</sup>

### Compound 112

Compound **112** was prepared according to general procedure described above. Colourless oil, 320 mg, 87% yield. Rf: 0.18 (AcOEt: Hexanes 3: 7);  $[\alpha]_D^{20} +22.6$  ( $c = 1$ , CHCl<sub>3</sub>). <sup>1</sup>H NMR (300 MHz, CDCl<sub>3</sub>):  $\delta$  7.62-7.36 (9 H, m, Har), 6.57 (1 H, d,  $J = 15.9$  Hz, CH=CHPh), 6.22 (1 H, dt,  $J = 15.9, 7.1$  Hz, CH=CHPh), 5.35 (1 H, dd,  $J = 8.5, 3.3$  Hz, H-3), 5.28-5.22 (2 H, m, H-4, H-2), 4.38 (1 H, dd,  $J = 12.1, 6.8$  Hz, H-6), 4.20-4.10 (2 H, m, H-6, H-1), 3.99 (1 H, m, H-5), 2.27-2.57 (2 H, m, CH<sub>2</sub>CH=CHPh), 2.15-2.04 (12 H, 4s, 4 OAc); <sup>13</sup>C NMR (75 MHz, CDCl<sub>3</sub>):  $\delta$  170.68, 170.17, 169.91, 169.66, 140.59, 140.16, 135.95, 132.69, 128.73, 127.25, 127.16, 126.84, 126.56, 125.75, 124.11, 73.98, 70.75, 70.07, 68.67, 67.09, 62.29, 32.91, 20.89, 20.73, 20.67, 20.55; MS (ESI): 525.20 [M+H]<sup>+</sup>, calcd. 525.20 for C<sub>29</sub>H<sub>32</sub>O<sub>9</sub> + H<sup>+</sup>

### Compound 113

Compound **113** was prepared according to general procedure described above. Colourless oil, 52 mg, 98% yield. Rf: 0.25 (AcOEt: Hexanes 3: 7);  $[\alpha]_D^{20} +18.17$  ( $c = 1$ , CHCl<sub>3</sub>). <sup>1</sup>H NMR (300 MHz, CDCl<sub>3</sub>):  $\delta$  7.61-7.58 (1 H, m, Har), 7.46-7.30 (8 H, m, Har), 6.5 (1 H, d,  $J = 15.6$  Hz, CH=CHPh), 6.1 (1 H, dt,  $J = 15.6, 6.8$  Hz, CH=CHPh), 5.29-5.20 (3 H, m, H-4, H-3, H-2), 4.34 (1 H, d,  $J = 12.1, 6.3$  Hz, H-6), 4.31-4.04 (2 H, m, H-6, H-1), 3.88 (1 H, m, H-5), 2.62-2.49 (2 H, m, CH<sub>2</sub>CH=CHPh), 2.13-2.06 (12 H, 4s, 4 OAc); <sup>13</sup>C NMR (75 MHz, CDCl<sub>3</sub>):  $\delta$  170.58, 170.07, 169.75, 169.55, 140.73, 140.37, 134.92, 132.10,

130.04, 129.65, 127.97, 127.35, 127.30, 126.91, 129.96, 124.80, 74.24, 70.53, 69.94, 68.59, 66.84, 62.20, 32.81, 20.84, 20.64, 20.58, 20.51; MS (ESI): 547.39  $[M+Na]^+$ , calcd. 547.19 for  $C_{29}H_{32}O_9 + Na^+$

### Compound 114

Compound **114** was prepared according to general procedure described above. Colourless oil, 300 mg, 89% yield. Rf: 0.22 (AcOEt: Hexanes 3: 7);  $[\alpha]_D^{20} +19.6$  ( $c = 1$ ,  $CHCl_3$ ).  $^1H$  NMR (300 MHz,  $CDCl_3$ ):  $\delta$  8.12 (2 H, d,  $J = 7.7$  Hz, Har), 7.86-7.76 (2 H, m, Har), 7.59-7.41 (4 H, m, Har), 7.28 (1 H, d,  $J = 15.6$  Hz,  $CH=CHPh$ ), 6.25-6.15 (1 H, m,  $CH=CHPh$ ), 5.40-5.21 (3 H, m, H-4, H-3, H-2), 4.38 (1 H, dd,  $J = 11.8$ , 6.6 Hz, H-6), 4.26-4.11 (2 H, m, H-6, H-1), 4.05-4.01 (1 H, m, H-5), 2.89-2.65 (2 H, m,  $CH_2CH=CHPh$ ), 2.10-2.0 (12 H, 4s, 4 OAc);  $^{13}C$  NMR (75 MHz,  $CDCl_3$ ):  $\delta$  170.71, 170.23, 169.97, 169.68, 134.76, 133.52, 130.53, 128.45, 127.84, 127.32, 126.04, 125.75, 125.54, 123.83, 74.20, 70.79, 70.11, 68.74, 67.05, 62.38, 33.12, 20.96, 20.78, 20.72, 20.56; MS (ESI): 499.34  $[M+H]^+$ , calcd. 499.20 for  $C_{27}H_{30}O_9 + H^+$

### Compound 115

Compound **115** was prepared according to general procedure of de-*O*-acetylation described above. 18 mg, 88% yield.  $[\alpha]_D^{20} +19.8$  ( $c = 1$ ,  $CH_3OH$ ).  $^1H$  NMR (300 MHz,  $CD_3OD$ ):  $\delta$  7.38-7.35 (2 H, m, Har), 7.28-7.23 (2 H, m, Har), 7.19-7.14 (1 H, m, Har), 6.49 (1 H, d,  $J = 15.9$  Hz,  $CH=CHPh$ ), 6.33-6.23 (1 H, m,  $CH=CHPh$ ), 3.98 (1 H, td,  $J = 6.6$ , 2.4 Hz, H-6), 3.82-3.80 (1 H, m, H-5), 3.78-3.72 (3 H, m, H-6, H-3, H-1), 3.67-3.62 (1 H, m, H-2), 3.56-3.50 (1 H, m, H-4), 2.69-2.59 (1 H, m,  $CH_2CH=CH$ ), 2.54-2.44 (1 H, m,  $CH_2CH=CH$ ).  $^{13}C$  NMR (75 MHz,  $CD_3OD$ ):  $\delta$  138.88, 133.46, 129.48, 128.14, 127.17, 127.12, 78.65, 76.26, 72.61, 72.14, 69.37, 63.03, 33.94; HRMS (ESI): 303.1202  $[M+Na]^+$ , calcd. 303.1203 for  $C_{15}H_{20}O_5 + Na^+$

### Compound 116

Compound **116** was prepared according to general procedure of de-*O*-acetylation described above. 29.3 mg, 96% yield.  $[\alpha]_D^{20} +30.2$  ( $c = 1$ ,  $CH_3OH$ ).  $^1H$  NMR (300 MHz,  $CD_3OD$ ):  $\delta$  7.63 (4 H, dd,  $J = 12.8$ , 7.9 Hz, Har), 7.48-7.31 (5 H, m, Har), 6.5 (1 H, d,  $J = 15.6$  Hz,  $CH=CHPh$ ), 6.40-6.31 (1 H, m,  $CH=CHPh$ ), 4.74-4.62 (1 H, m, H-6), 4.49-4.38 (1 H, m, H-5), 3.79-3.78 (1 H, m, H-1), 3.58-3.41 (4 H, m, H-4, H-3, H-2), 2.49-2.44 (2 H, m,  $CH_2CH=CH$ );  $^{13}C$  NMR (75 MHz,  $CD_3OD$ ):  $\delta$  139.71, 138.56, 130.55, 128.92, 127.33, 126.74, 126.44, 126.39, 76.17, 74.96, 70.98, 69.69, 68.24, 61.14, 33.24. ESI<sup>+</sup>-HRMS:  $[M+NH_4]^+$  calcd for  $C_{21}H_{28}NO_5$ , 374.1962; found, 374.1960. HRMS (ESI): 379.1515  $[M+Na]^+$ , calcd. 379.1521 for  $C_{21}H_{24}O_5 + Na^+$

## Compound 117 : full structural characterization

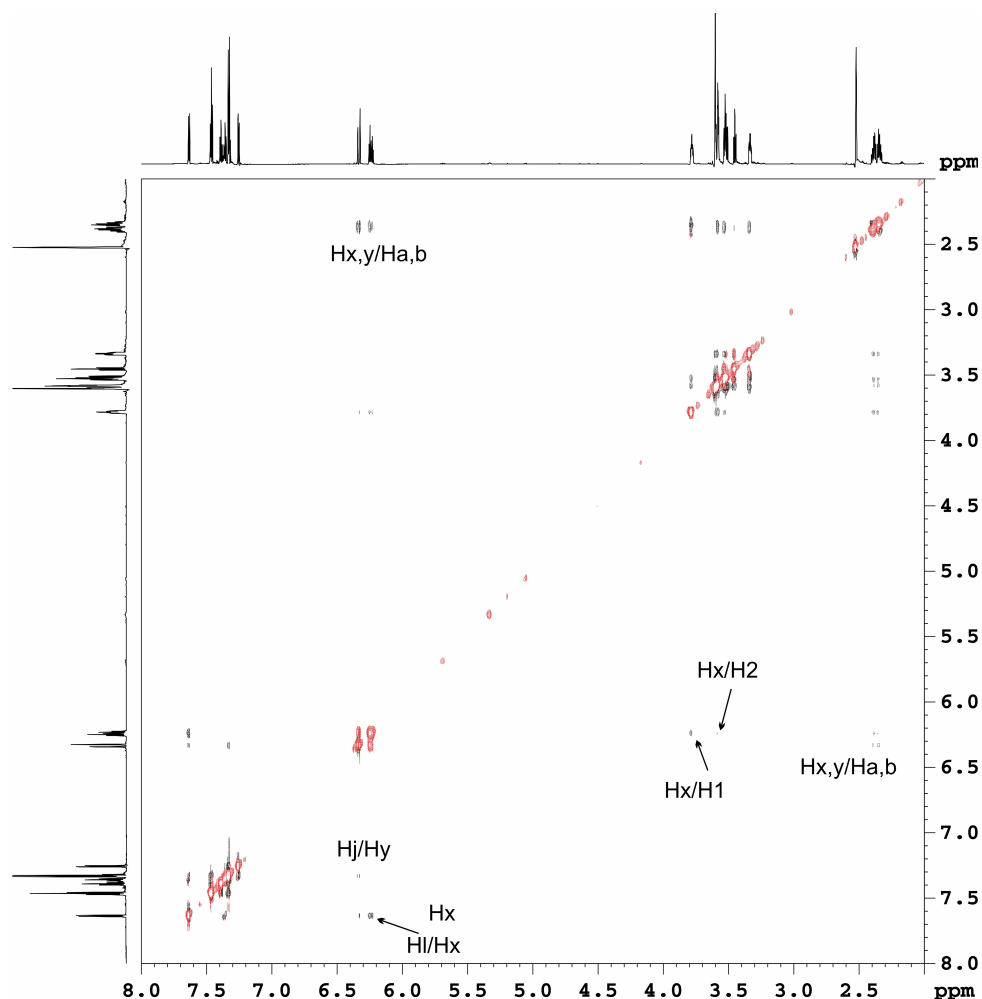

**Figure S13.** High field (900 MHz) NMR ROESY spectra of **117** in DMSO- $d_6$ .

Compound **117** was prepared according to general procedure of de-*O*-acetylation described above. 31 mg, 92% yield.  $[\alpha]_D^{20} +27.2$  ( $c = 1$ ,  $\text{CH}_3\text{OH}$ ).  $^1\text{H}$  NMR (300 MHz,  $\text{CD}_3\text{OD}$ ):  $\delta$  7.62-7.59 (1 H, m, Har), 7.43-7.18 (8 H, m, Har), 6.4 (1 H, d,  $J = 15.6$  Hz,  $\text{CH}=\text{CHPh}$ ), 6.23-6.13 (1 H, m,  $\text{CH}=\text{CHPh}$ ), 3.96 (1 H, td,  $J = 6.6, 2.2$  Hz, H-6), 3.77-3.67 (3 H, m, H-6, H-5, H-1), 3.69-3.63 (2 H, m, H-3, H-2), 3.60-3.44 (1 H, m, H-4), 2.55-2.47 (1 H, m,  $\text{CH}_2\text{CH}=\text{CH}$ ), 2.41-2.32 (1 H, m,  $\text{CH}_2\text{CH}=\text{CH}$ );  $^{13}\text{C}$  NMR (75 MHz,  $\text{CD}_3\text{OD}$ ):  $\delta$  142.45, 141.78, 136.65, 132.38, 130.77, 129.15, 128.52, 128.20, 128.15, 128.05, 127.08, 78.73, 76.02, 72.54, 72.19, 69.27, 62.98, 34.16; MS (ESI): 379.15  $[\text{M}+\text{Na}]^+$ , calcd. 379.15 for  $\text{C}_{21}\text{H}_{24}\text{O}_5 + \text{Na}^+$

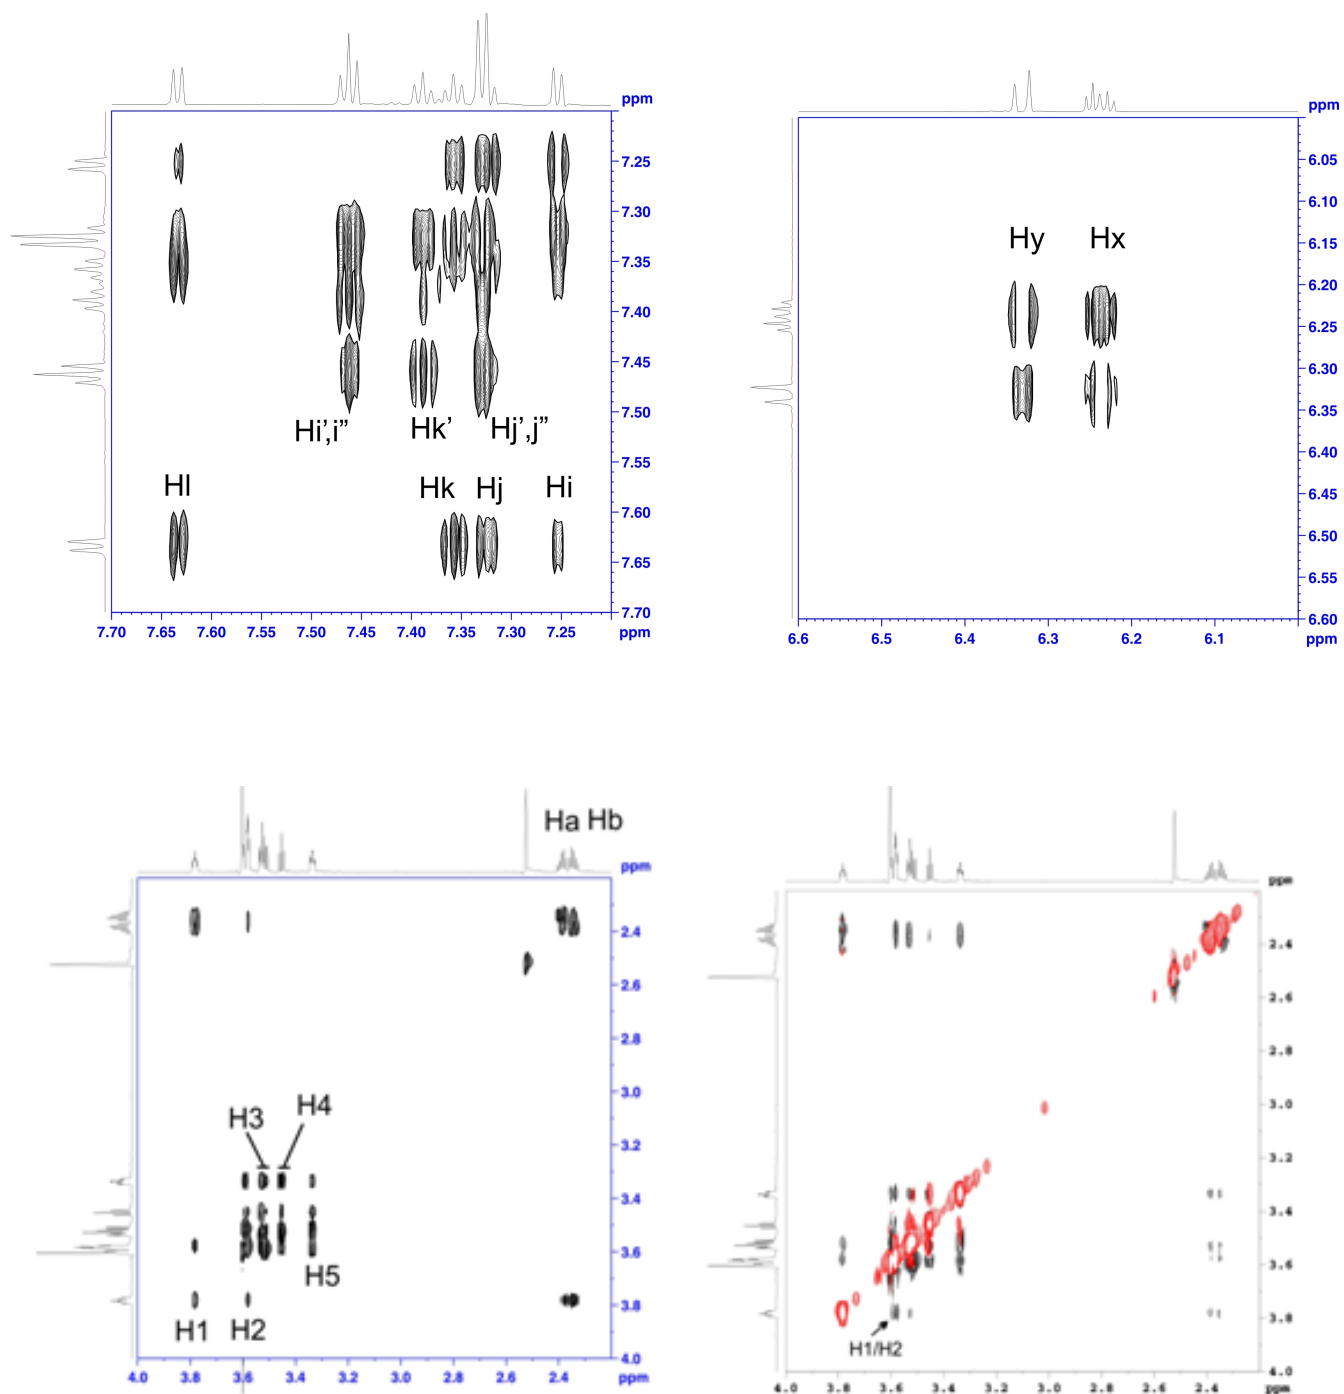

**Figure S14-S16.**  $^1\text{H}$ -NMR analysis of **117** in  $\text{DMSO-d}_6$ .

| Proton                                    | $\delta$ | $\delta$ Carbon                                          | Coupling constants (Hz)              | main nOe contacts with |
|-------------------------------------------|----------|----------------------------------------------------------|--------------------------------------|------------------------|
| H1                                        | 3,783    | 76,8                                                     |                                      | H2                     |
| H2                                        | 3,582    | 71,3                                                     | $^3J_{2,1} : 2.7$ $^3J_{2,3} : 3.1$  |                        |
| H3                                        | 3,531    | 72,4                                                     | $^3J_{3,4} : 7.5$                    |                        |
| H4                                        | 3,453    | 69,3                                                     | $^3J_{4,5} : 7.5$                    |                        |
| H5                                        | 3,335    | 77,3                                                     | $^3J_{5,6} : 7.0$ $^3J_{5,6'} : 3.2$ |                        |
| H6                                        | 3,598    | 62,6                                                     | $^2J_{6,6'} : 12.0$                  |                        |
| H6'                                       | 3,517    |                                                          |                                      |                        |
| Ha                                        | 2,385    | 35,3                                                     |                                      | Hx, Hy                 |
| Hb                                        | 2,347    |                                                          |                                      | Hx, Hy                 |
| Hx                                        | 6,238    | 130                                                      |                                      | Hl, Hl                 |
| Hy                                        | 6,331    | 131,2                                                    | $^3J_{x,y} : 15.3$                   | Ha, Hb, Hi', i''       |
| Hl                                        | 7,634    | 127,5                                                    | $^3J_{l,j} : 7.3$ $^4J_{l,k} : 1.7$  | Hx, Hj                 |
| Hj                                        | 7,358    | 128,9                                                    |                                      |                        |
| Hk                                        | 7,325    | 129                                                      |                                      |                        |
| Hi                                        | 7,254    | 131,5                                                    | $^3J_{i,k} : 7.3$ $^4J_{l,j} : 1.7$  | Hi' or i''             |
| Hj', j''                                  | (t)7.462 | 129,8                                                    | $^3J_{j',j''} : 7.6$                 |                        |
| Hi', i''                                  | (d)7.329 | 131,1                                                    | $^3J_{j',j''} : 6.8$                 |                        |
| Hk'                                       | 7,388    | 128,8                                                    | $^3J_{k,j',j''} : 7.3$               |                        |
| <b>Quaternary carbon for benzyl (ppm)</b> |          | Cbzl 1,1 : 136.5<br>Cbzl 1,2 : 141.2<br>Cbzl 2,1 : 141.9 |                                      |                        |

**Table S1.** Results from the detailed analysis of **117** by 600 MHz NMR.

Assignments based on COSY, ROESY and TOCSY. Value obtained at 293 K in DMSO, quaternary carbons were attributed with the help of HMBC experiments.

### Compound 118

Compound **118** was prepared according to general procedure of de-*O*-acetylation described above. 82 mg, 97 % yield.  $[\alpha]_D^{20} +13.6$  ( $c = 1$ , CH<sub>3</sub>OH).  $^1\text{H}$  NMR (300 MHz, DMSO-*d*<sub>6</sub>):  $\delta$  8.19-8.17 (1 H, m, Har), 7.94-7.79 (2 H, m, Har), 7.66-7.46 (4 H, m, Har), 7.26 (1H, d,  $J = 15.9$  Hz, CH=CHPh), 6.35-6.28 (1 H, m, CH=CHPh), 4.76-4.65 (2H, m, H-6, H-5), 4.52-4.41 (2 H, m, H-6, H-1), 3.64-3.32 (3 H, m, H-4, H-3, H-2), 2.59-2.49 (2 H, m, CH<sub>2</sub>CH=CH);  $^{13}\text{C}$  NMR (75 MHz, DMSO-*d*<sub>6</sub>):  $\delta$  134.81, 133.25, 130.75,

130.44, 128.32, 127.96, 127.20, 126.03, 125.77, 125.36, 123.77, 123.17, 76.12, 75.00, 71.04, 69.81, 68.26, 61.16, 33.40; HRMS (ESI): 353.1365  $[M+Na]^+$ , calcd. 353.1364 for  $C_{19}H_{22}O_5 + Na^+$

### Compound 119

Compound 119 was prepared according to general procedure of hydrogenation described above. 53.5 mg, 95% yield.  $[\alpha]_D^{20} +33.5$  ( $c = 1$ ,  $CH_3OH$ ).  $^1H$  NMR (300 MHz,  $CD_3OD$ ):  $\delta$  7.17-7.01 (5 H, m, Har), 3.79-3.70 (1H, m, H-6), 3.68 (1 H, dd,  $J = 11.8, 2.7$  Hz, H-5), 3.63-3.51 (4 H, m, H-6, H-3, H-2, H-1), 3.27-3.24 (1 H, m, H-4), 2.60-2.49 (2H, m,  $CH_2CH_2CH_2Ph$ ), 1.75-1.52 (3 H, m,  $HCHCH_2CH_2Ph$ ), 1.42-1.32 (1 H, m,  $HCHCH_2CH_2Ph$ );  $^{13}C$  NMR (75 MHz,  $CD_3OD$ ):  $\delta$  143.45, 129.4, 129.3, 126.75, 78.82, 75.56, 73.08, 72.78, 69.19, 62.98, 36.41, 29.05, 28.81; HRMS (ESI): 283.1539  $[M+H]^+$ , calcd. 283.1540 for  $C_{15}H_{22}O_5 + H^+$

### Compound 120

Compound 120 was prepared according to general procedure of hydrogenation described above. 48.2 mg, 96% yield.  $[\alpha]_D^{20} +21.8$  ( $c = 1$ ,  $CH_3OH$ ).  $^1H$  NMR (300 MHz,  $CD_3OD$ ):  $\delta$  7.49-7.41 (4 H, m, Har), 7.33-7.27 (2 H, m, Har), 7.22-7.18 (3 H, m, Har), 3.81-3.75 (1 H, m, H-6), 3.69 (1 H, dd,  $J = 11.8, 2.7$  Hz, H-5), 3.62-3.48 (4 H, m, H-6, H-3, H-2, H-1), 3.31-3.27 (1 H, m, H-4), 2.65-2.52 (2H, m,  $CH_2CH_2CH_2Ph$ ), 1.79-1.65 (2H, m,  $CH_2CH_2CH_2Ph$ ), 1.45-1.37 (2 H, m,  $CH_2CH_2CH_2Ph$ );  $^{13}C$  NMR (75 MHz,  $CD_3OD$ ):  $\delta$  142.68, 142.37, 139.99, 129.96, 129.78, 128.03, 127.90, 127.78, 78.80, 75.70, 73.11, 72.84, 69.31, 63.11, 36.03, 29.12, 28.74; HRMS (ESI): 381.1682  $[M+Na]^+$ , calcd. 381.1672 for  $C_{21}H_{26}O_5 + Na^+$

### Compound 121

Compound 121 was prepared according to general procedure of hydrogenation described above. 48.2 mg, 96% yield.  $[\alpha]_D^{20} +18.4$  ( $c = 1$ ,  $CH_3OH$ ).  $^1H$  NMR (300 MHz,  $CD_3OD$ ):  $\delta$  7.45-7.21 (7 H, m, Har), 7.13 (1 H, d,  $J = 7.1$ , Har), 7.0 (1 H, d,  $J = 7.1$ , Har), 3.58-3.52 (1 H, m, H-6), 3.44-3.26 (4 H, m, H-6, H-5, H-3, H-1), 3.16-3.14 (2H, m, H-2, H-4), 2.56-2.48 (2H, m,  $CH_2CH_2CH_2Ph$ ), 1.56-1.43 (3 H, m,  $HCHCH_2CH_2Ph$ ), 1.38-1.13 (1 H, m,  $HCHCH_2CH_2Ph$ ).  $^{13}C$  NMR (75 MHz,  $CD_3OD$ ):  $\delta$  142.14, 141.36, 141.28, 139.40, 130.23, 129.68, 128.90, 128.17, 127.52, 75.38, 74.98, 71.16, 70.54, 68.05, 61.25, 32.39, 28.64, 27.04; HRMS (ESI): 359.1855  $[M+H]^+$ , calcd. 359.1853 for  $C_{21}H_{26}O_5 + H^+$

## Compound 122

Compound **122** was prepared according to general procedure of debenzylation described above. 57.3 mg, 96% yield.  $[\alpha]_D^{20} +16.8$  ( $c = 1$ , CH<sub>3</sub>OH). <sup>1</sup>H NMR (300 MHz, CD<sub>3</sub>OD):  $\delta$  7.95 (1 H, d,  $J = 7.9$  Hz, Har), 7.69-7.55 (2 H, m, Har), 7.39-7.21 (4 H, m, Har), 3.80-3.77 (1 H, m, H-6), 3.69-3.94 (4 H, m, H-6, H-5, H-3, H-1), 3.28-3.20 (1 H, m, H-2), 3.04-2.99 (1 H, m, H-4), 2.62-2.54 (2H, m, CH<sub>2</sub>CH<sub>2</sub>CH<sub>2</sub>Ph), 1.82-1.55 (2H, m, CH<sub>2</sub>CH<sub>2</sub>CH<sub>2</sub>Ph), 1.49-1.40 (2H, m, CH<sub>2</sub>CH<sub>2</sub>CH<sub>2</sub>Ph); <sup>13</sup>C NMR (75 MHz, CD<sub>3</sub>OD):  $\delta$  139.52, 135.40, 133.15, 129.90, 129.69, 127.57, 126.99, 126.72, 126.40, 124.84, 78.65, 75.60, 73.09, 72.81, 69.17, 62.92, 33.28, 29.43, 28.18; HRMS (ESI): 333.1700  $[M+H]^+$ , calcd. 333.1696 for C<sub>19</sub>H<sub>24</sub>O<sub>5</sub> + H<sup>+</sup>

## Compound 123

Compound **123** was prepared according to general procedure of hydrogenation of **78** as described above. 48 mg, 95% yield.  $[\alpha]_D^{20} +24.6$  ( $c = 1$ , CH<sub>3</sub>OH). <sup>1</sup>H NMR (300 MHz, CD<sub>3</sub>OD):  $\delta$  3.75-3.69 (1 H, m, H-6), 3.65 (m, dd,  $J = 11.8, 2.7$  Hz, H-5), 3.60-3.48 (4 H, m, H-6, H-3, H-2, H-1), 3.29-3.23 (1 H, m, H-4), 1.67-1.57 (1 H, m, HCHCH<sub>2</sub>CH<sub>3</sub>), 1.42-1.17 (3H, m, HCHCH<sub>2</sub>CH<sub>3</sub>), 0.82 (3H, t,  $J = 7$  Hz, CH<sub>2</sub>CH<sub>3</sub>); <sup>13</sup>C NMR (75 MHz, CD<sub>3</sub>OD):  $\delta$  78.75, 75.48, 73.14, 72.83, 69.22, 63.06, 31.74, 20.13, 14.17; HRMS (ESI): 207.1221  $[M+H]^+$ , calcd. 207.1227 for C<sub>9</sub>H<sub>18</sub>O<sub>5</sub> + H<sup>+</sup>

## Surface plasmon resonance solution affinity

### Synthesis of 8-aminooctyl $\alpha$ -D-mannopyranoside (**5b**) as a competitive steady state binder

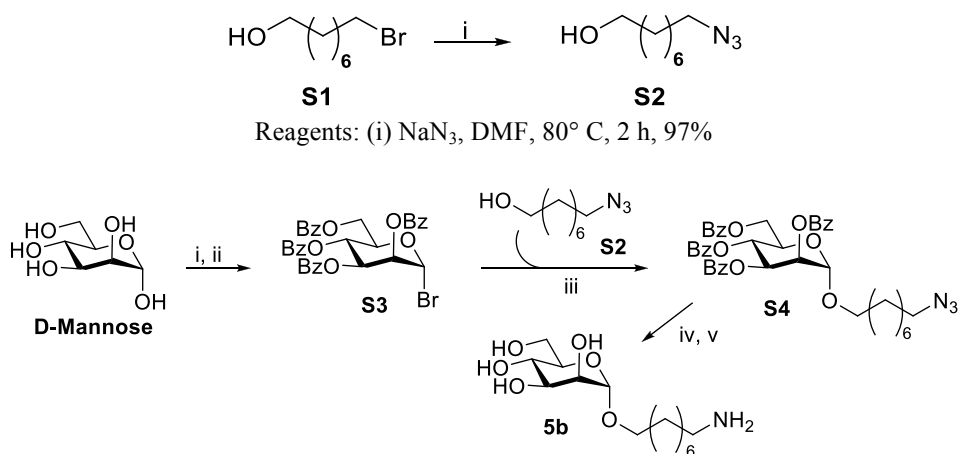

**Scheme S5.** Reagents: (i) BzCl, DMAP, pyridine, 0° C  $\rightarrow$  rt, 36 h, quant.; (ii) HBr (33% in AcOH), AcOH, 0° C  $\rightarrow$  rt, 36 h; (iii) AgOTf, DCM, 0° C  $\rightarrow$  rt, 24 h, 85% over 2 steps; (iv) NaOMe, MeOH, rt, 2 h, 95%; (v) Pd/C, H<sub>2</sub>, MeOH, (H-cube), 80%.

**1-Azido-octan-8-ol (S2).** Compound **S1** (200 mg, 0.96 mmol) and sodium azide were dissolved in DMF (5 mL) and stirred for 2 h at 80 °C. The reaction mixture was poured onto ice-water (50 mL) and stirred for 30 min, extracted two times with EtOAc (25 mL), dried over Na<sub>2</sub>SO<sub>4</sub>, filtrated, concentrated *in vacuo* and purified with flash column chromatography (toluene) to yield compound **S2** (156 mg, 0.931 mmol, 97%). <sup>1</sup>H NMR (500 MHz, CDCl<sub>3</sub>): δ = 3.62 (t, *J*=6.5, 2H) and 3.24 (t, *J*=7.0, 2H) (H-1, H-8), 1.54-1.63 (m, 5H, H-2, H-7, OH), 1.34-1.41 (m, 8H, H-3 - H-6). <sup>13</sup>C NMR (125 MHz, CDCl<sub>3</sub>): δ = 62.9 (CH<sub>2</sub>OH), 51.4 (CH<sub>2</sub>N<sub>3</sub>), 32.7, 29.2, 29.0, 28.8, 26.6 and 25.6 (C-2-7).

**8-Azido-octyl 2,3,4,6-tetra-O-benzoyl-α-D-mannopyranoside (S4).** D-Mannose (1.0 g, 5.6 mmol) was dissolved in pyridine (20 mL) and DMAP (catalytic amount, 15 mg) was added. Benzoyl chloride (10.2 mL, 88.8 mmol) was added dropwise. After 36 h the solvent was removed under reduced pressure and co-evaporated with toluene and purified by flash silica gel chromatography (toluene) to give perbenzoylated mannose which was dissolved in HBr/HOAc (39% HBr in AcOH, 45 mL) and the mixture was stirred for 36 h at rt. The reaction mixture was diluted with CH<sub>2</sub>Cl<sub>2</sub> (75 mL) and washed with ice water and NaHCO<sub>3</sub> (aqueous saturated solution, 50 mL), dried over MgSO<sub>4</sub>, filtrated and concentrated *in vacuo* to give crude compound **S3**. The bromo sugar **S3** (152 mg, 0.23 mmol) was dissolved in dry CH<sub>2</sub>Cl<sub>2</sub> (2 mL) and stirred for 15 min in the presence of molecular sieves (4 Å) at 0 °C under an Ar atmosphere. Then a solution of AgOTf (77 mg, 0.30 mmol) and **S2** (80 mg, 0.48 mmol) in toluene (1 mL) was added drop wise. After 24 h TLC (1:1, CH<sub>2</sub>Cl<sub>2</sub>-toluene) showed complete reaction and the mixture was filtered through Celite and concentrated. Purification using silica gel flash chromatography gave compound **S4** (148 mg, 0.197 mmol, 85%). *R<sub>f</sub>*: 0.72 (toluene). <sup>1</sup>H NMR (500 MHz, CDCl<sub>3</sub>): δ = 8.14 – 8.02 (m, 4H), 8.01 – 7.93 (m, 2H), 7.88 – 7.79 (m, 2H), 7.63 – 7.53 (m, 2H), 7.49 (t, *J*=7.4, 1H), 7.45 – 7.32 (m, 7H), 7.25 (t, *J*=7.8, 2H), (all H-aromatic), 6.11 (t, *J*=10.1, 1H, H-4), 5.94 (dd, *J*=10.1, 3.3, 1H, H-3), 5.70 (dd, *J*=3.1, 1.8, 1H, H-2), 5.10 (d, *J*=1.4, 1H, H-1), 4.71 (dd, *J*=12.1, 2.5, 1H, H-6<sub>a</sub>), 4.50 (dd, *J*=12.1, 4.6, 1H, H-6<sub>b</sub>), 4.46 – 4.40 (m, 1H, H-5), 3.83 (dt, *J*=9.6, 6.7, 1H, H-1'<sub>a</sub>), 3.58 (dt, *J*=9.6, 6.6, 1H, H-1'<sub>b</sub>), 3.26 (t, *J*=7.0, 2H, CH<sub>2</sub>N<sub>3</sub>), 1.88 – 1.66 (m, 2H, H-2'), 1.66 – 1.56 (m, 2H, H-7'), 1.50 – 1.30 (m, 8H, H-3'-H-6'). <sup>13</sup>C NMR (125 MHz, CDCl<sub>3</sub>): δ = 166.13, 165.51 (double peak) and 165.46 (C=O), 133.43, 133.40, 133.14 and 133.04 (C-quaternary), 129.92, 129.84, 129.79, 129.72, 129.72, 129.41, 129.15, 129.05, 128.57, 128.42 and 128.29 (C-aromatic), 97.67 (C-1), 70.69 (C-2), 70.18 (C-3), 68.88 (C-5), 68.74 (C-1'), 67.13 (C-4), 63.01 (C-6), 51.46 (CH<sub>2</sub>N<sub>3</sub>), 29.34, 29.23, 29.06, 28.84, 26.66 and 26.05 (C-2' – C-7'). LRMS [*M*+Na]<sup>+</sup> calculated for C<sub>42</sub>H<sub>43</sub>N<sub>3</sub>O<sub>10</sub>: 772.8, found 772.4



**8-Aminooctyl  $\alpha$ -D-mannopyranoside (5b).** Compound **S4** (148 mg, 0.197 mmol) was dissolved in MeOH (5 mL) and  $\text{CH}_2\text{Cl}_2$  (1 mL) and treated with NaOMe (0.2 mL, 1M in MeOH). After stirring for 2 h at rt the reaction was neutralized using Dowex<sup>®</sup> acidic ion-exchange resin and purified by silica gel flash column chromatography (EtOAc-MeOH, 7:2) to give the 8-azidooctyl  $\alpha$ -D-mannopyranoside (60 mg, 95%) as a clear resin. This azide (60 mg, 0.180 mmol) was dissolved in MeOH (6 mL) and hydrogenated using an H-cube at 25° C, 30 bar and a flow rate of 0.3 mL/min. Purification over a 600 mg C18 MAXI-CLEAN cartridge (Alltech) afforded compound **5b** (48 mg, 80%).  $R_f$ : 0.15 (9:3:2:0.1, EtOAc/DCM/MeOH/H<sub>2</sub>O); <sup>1</sup>H NMR (500 MHz, D<sub>2</sub>O):  $\delta$  = 4.76 (s, 1H, H-1), 3.57 (m 3H); 3.71 (m, 2H), 3.43 (m, 1H); 3.51 (m, 2H), 2.54 (t,  $J$ =7.0, 2H), 1.23-1.52 (m, 12H, H-3' - H-6'). <sup>13</sup>C NMR (125 MHz, D<sub>2</sub>O):  $\delta$  = 99.7 (C-1), 72.7, 70.7, 70.1, 67.9 and 66.8 (C-2-5, C-1'), 60.9 (C-6), 40.4 (CH<sub>2</sub>NH<sub>2</sub>), 31.0, 28.5, 28.43, 28.41, 26.0 and 25.3 (C-2'-7'). LRMS  $[M+H]^+$  calculated for C<sub>14</sub>H<sub>29</sub>NO<sub>6</sub>: 308.4, found 308.2.

#### Steady state affinity measurement with compound 8-aminooctyl $\alpha$ -D-mannopyranoside (5b)

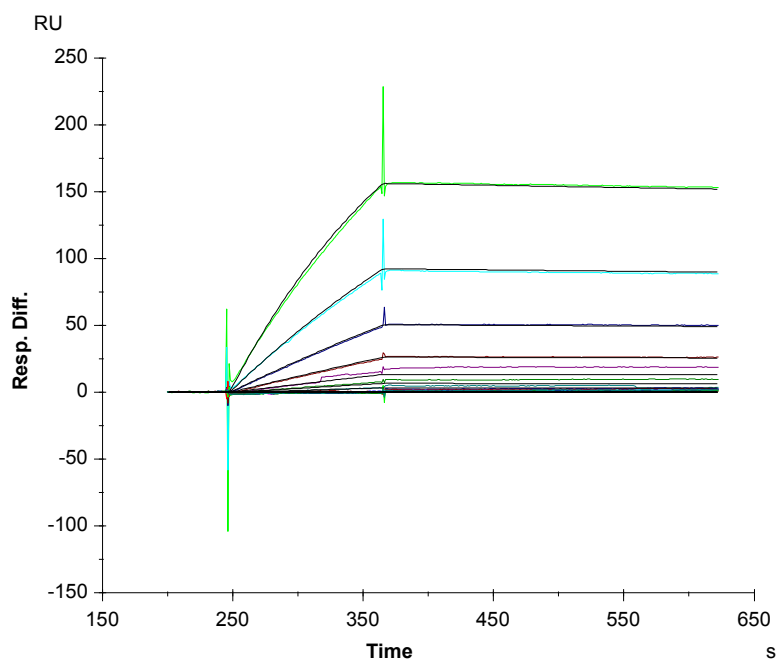

**Figure S18.** Steady state affinity ( $K_d = 16.9 \text{ nM} \pm 0.4$ ,  $\chi^2 = 3.37$ ) of FimH lectin with **5b**

#### SPR measurements and solution affinity fits for lead compounds oligomannose-3, n-heptyl $\alpha$ -D-mannose (5) and n-octyl $\alpha$ -D-mannose (5a)

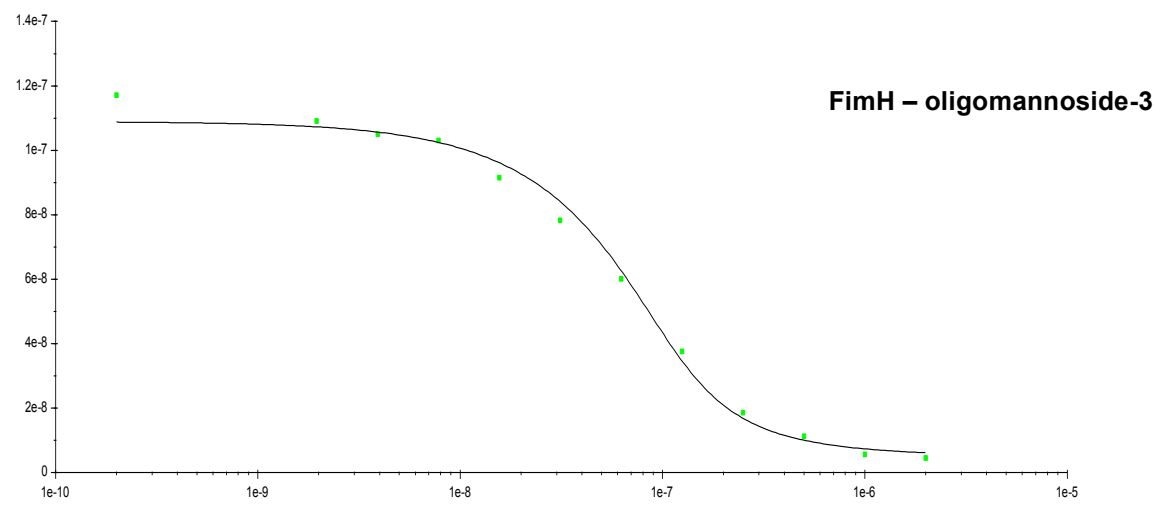

| KA(1/M)    | KD(M)         | Initial Conc B | constant | Chi2         |
|------------|---------------|----------------|----------|--------------|
| 49462067.1 | 2.02175133e-8 | 5.10445473e-9  | 1.70E-17 | 1.0371967e-7 |

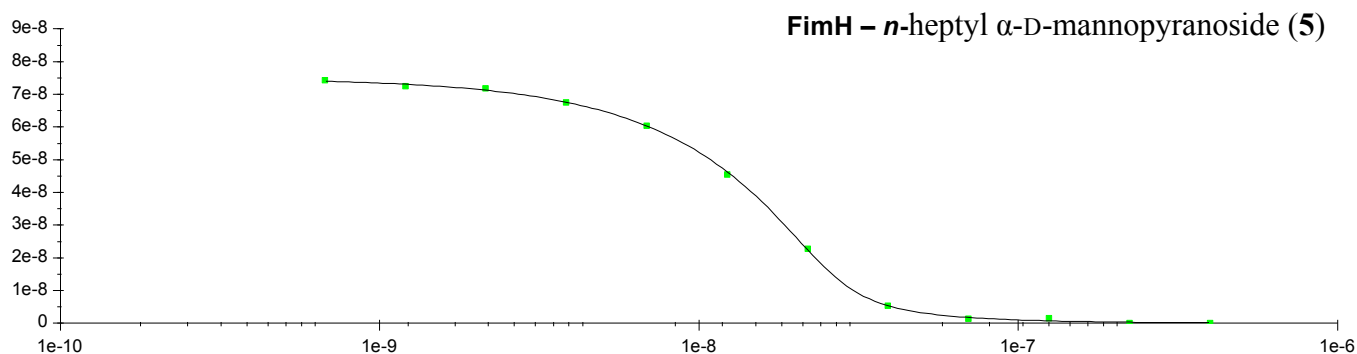

| KA(1/M)   | KD(M)         | Initial Conc B | Chi2     |
|-----------|---------------|----------------|----------|
| 231691100 | 4.31609155e-9 | 7.49411143e-8  | 2.51E-19 |

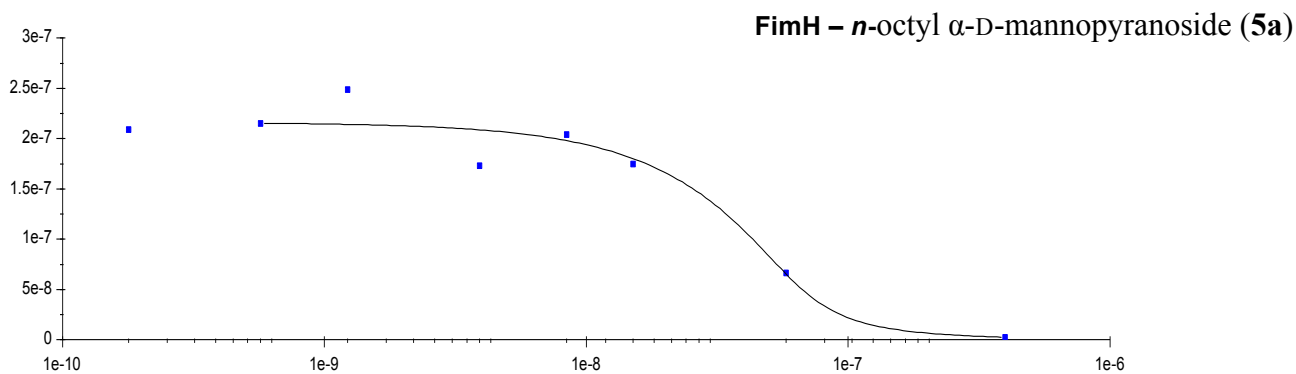

| KA(1/M)    | KD(M)         | Initial Conc B | Chi2     |
|------------|---------------|----------------|----------|
| 46550590.5 | 2.14820046e-8 | 2.16099467e-7  | 5.11E-16 |

**Figure S19.** Inhibition curves and fitted equilibrium constants for lead compounds with FimH

The FimH lectin domain concentrations were plotted in function of the mannoside concentration to obtain inhibition curves. The fit of the solution affinity interaction model yielded the FimH – mannoside affinity

in most cases. Exceptions were compounds that either had low solubility in aqueous solvents, or subnanomolar affinity compounds. The latter showed an apparent stoichiometrical binding to FimH within the concentration range of sugar from micromolar up to nanomolar, for which no solution affinity sigmoidal could be fitted (**Figure S10**). The affinity of these compounds (**62**, **118**, **120** and **122**) was marked by nf (no good fit could be obtained).

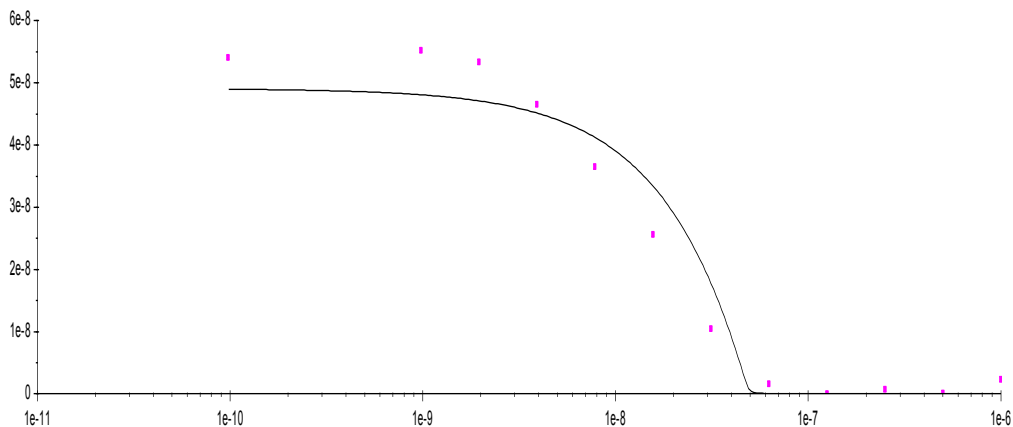

**Figure S20.** Example of a linear titration curve (fuchsia) that does not follow a sigmoidal fit (black line). This apparent stoichiometric binding to FimH was obtained for inhibitors with low solubilities and nanomolar affinities. Although SPR did thus not allow to measure subnanomolar affinities, HAI (this manuscript) and ITC measurements [15] confirmed that none of the ligands has subnanomolar affinities for FimH.

**Comparisons of the potency of compounds using inhibition assays based on whole cell interactions (HAI) vs based on molecular interactions either via competition (SPR) or direct (ITC)**

In this tabulated comparison appear two series of *O*-linked compounds with linkers from alkynyl over alkenyl to alkyl to otherwise the structurally similar substituents: series **51**, **23**, and **27**, and series **53**, **25** and **29**. When combining HAI, SPR and ITC data for the first series, **51**, **23**, **27**, as well as the second one, **53**, **25**, **29**, it can be concluded that in both cases the alkenyl linker is favored. Alkyls are slightly less soluble than alkenyls and it is presumable that **27** and **29** have suffered from the lack of DMSO in the SPR experiment, indicated by the observation in the HAI assay that they are equally well or better inhibitors as compared to the compounds with alkenyl linkers. By enabling complete solubility of the compound in the HAI assay, using 10% DMSO, the HAI data disambiguate the higher affinities for a double bond (**22-25**) over a single bond (**26-29**) at post-glycosidic linkage atomic positions two to three. Whereas SPR displays non-fittable data in competition assay for less water-soluble compounds with close to nanomolar or subnanomolar affinities, such as for the alkenyl **62**, the HAI assay overcomes this problem because it is very tolerant to the presence of DMSO.

| <b>Cpd</b> | <b>K<sub>d</sub> SPR (nM)</b> | <b>IC<sub>50</sub> HAI (μM)</b> | <b>K<sub>d</sub> ITC (nM)</b> |
|------------|-------------------------------|---------------------------------|-------------------------------|
| <b>51</b>  | 405 ± 24                      | 100                             | 60 ± 9.5                      |
| <b>23</b>  | 3.0 ± 1.1                     | 25                              | nd                            |
| <b>27</b>  | 10 ± 0.3                      | 25                              | 1.5 ± 0.3                     |
| <b>53</b>  | 120 ± 18                      | 50                              | nd                            |
| <b>25</b>  | 5.0 ± 1.4                     | 50                              | 71 ± 23                       |
| <b>29</b>  | 22 ± 3.0                      | 25                              | nd                            |
| <b>5</b>   | 4.3 ± 0.3                     | 6.25                            | 7.7 ± 1.7                     |
| <b>61</b>  | 6.9 ± 1.0                     | 12.5                            | 21 ± 6.8                      |
| <b>62</b>  | nf                            | 25                              | 90 ± 21                       |
| <b>37</b>  | 14 ± 5.0                      | 25                              | 59 ± 5                        |
| <b>116</b> | 17 ± 3.5                      | 100                             | 58 ± 14                       |
| <b>120</b> | nf                            | 12.5                            | nd                            |
| <b>56</b>  | 53 ± 2.3                      | 50                              | 91 ± 11                       |
| <b>55</b>  | 83 ± 5.6                      | 50                              | 105 ± 34                      |
| <b>4</b>   | 151                           | 100                             | 156 ± 45                      |
| <b>118</b> | nf                            | 25                              | 23 ± 5.5                      |
| <b>122</b> | nf                            | 12.5                            | nd                            |

**Table S2:** Comparison of affinity trends using three complementary methods.

Inhibition of haemagglutination was performed to bridge lacking information on the affinity from SPR and/or ITC. In the HAI assay, DMSO was added at a 10% concentration to maintain these most hydrophobic compounds in solution. nd: not determined. nf: not fittable.

## Molecular dynamics simulations

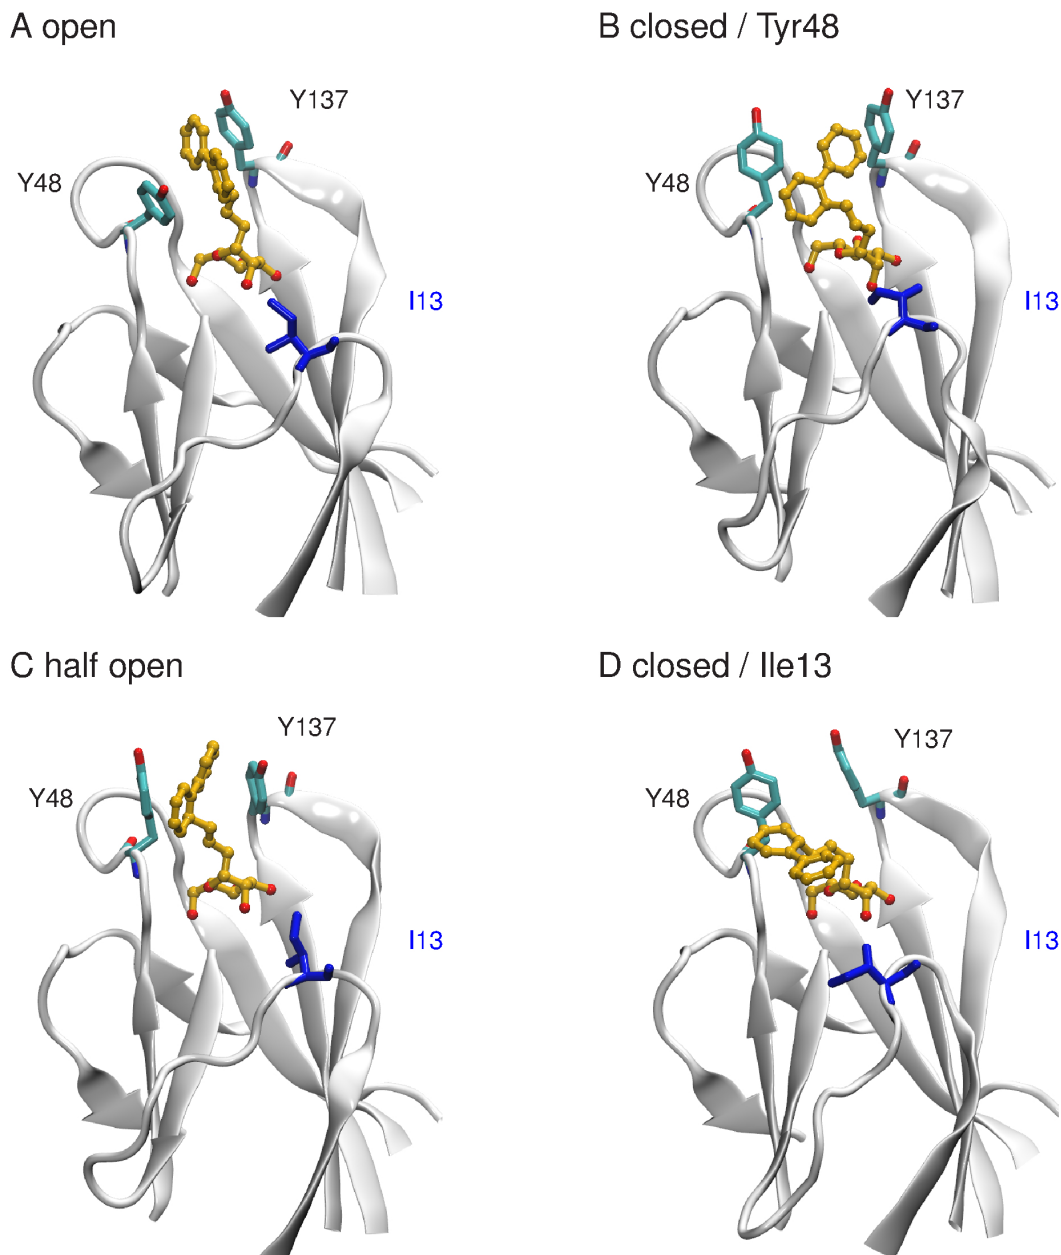

**Figure S21:** Four binding positions have been observed for the aglycon of **117** bound to FimH during molecular dynamics simulations. (1) the *open* conformer, in which the tyrosine gate is *open* and the second aromatic ring of **117** is almost parallel  $\pi$ - $\pi$  stacked between Tyr48 and Tyr137; (2) the *closed/Tyr48* conformer, in which the tyrosine gate is *closed* with the first aromatic ring of **117** in a nearly parallel aromatic stacking interaction with Tyr48 and the second ring in T-stacking with Tyr137; (3) the *half-open* conformer, in which the aglycon part of **117** inserts partially between the two tyrosines; and (4) the *closed/Ile13* conformer, in which the first ring of the aglycon of **117** has stabilised the closing of the gate and the aglycon is oriented towards the Ile13 residue that resides in the clamp loop of the FimH

adhesin [3]. Upon visual inspection the poses in the lower row are less populated as the ones in the upper row. In all images, the protein is depicted as a white cartoon. The **117** ligand (orange) and important protein residues are shown in ball-and-stick representation. Ile13 in the clamp loop of FimH is colored blue.

**Movie S1:** The movement of **117** in the simulation after removal of the structural water. The protein is shown in white cartoon, the clamp loop region in lime, and important residues are shown as sticks: the tyrosine gate residues Tyr48, Ile52 and Tyr137 are in purple and the clamp loop residue Ile13 is shown in lime. Additionally, the oxygens of all waters within 3 Å of the sugar oxygens of **117** and the protein are shown as small red spheres.

## **References**

1. Touaibia, M.; Wellens, A.; Shiao, T.C.; Wang, Q.; Sirois, S.; Bouckaert, J.; Roy, R. Mannosylated g(0) dendrimers with nanomolar affinities to escherichia coli fimh. *ChemMedChem.* **2007**, *2*, 1190-1201.
2. Roy, R.; Dominique, R.; Das, S.K. Extended alkenyl glycosides by ruthenium-catalyzed cross-metathesis reaction and application toward novel c-linked pseudodisaccharides. *J Org Chem* **1999**, *64*, 5408-5412.
3. Le Trong, I.; Aprikian, P.; Kidd, B.A.; Forero-Shelton, M.; Tchesnokova, V.; Rajagopal, P.; Rodriguez, V.; Interlandi, G.; Klevit, R.; Vogel, V., *et al.* Structural basis for mechanical force regulation of the adhesin fimh via finger trap-like beta sheet twisting. *Cell* **2010**, *141*, 645-655.
